# Supplementary material
Source: MDPI journal article supplement (https://www.mdpi.com/2311-5637/6/3/90)
Supplement: s1 [file s1]

## Sheet: ITS_sequences
Table S1: List of yeast strains isolated in this study
	this study
dex	qseqid	GenBankAccession	sseqid	query_dna	species	note	stitle	pident	match_length	evalue	nident	mismatch	gapopen	gaps	qseq	sseq	phyl	ord	fam	genus
1	G2_163_02-3	MT988151	MH863790.1	TACCTGATCCGAGGTCACCTTGTAAGCAAAAAAGGTATAGACCGGGTGCCGCCAAACCCTAGATCCGATACGTGCTCAGTTAAGAAGCTCAGTGTACCGGGGGTTCAACAGCCGCCGTCATTGTCTTTAGGAGGGGTCTAGGGGTACCTAAACCAAACCGTCCAACACCAAGCCGGGGGCTTGAGGGGTGAAAATGACGCTCGAACAGGCATGCCCTTCGGAATACCAAAGGGCGCAATGTGCGTTCAAAGATTCGATGACTCACTGGAATTCTGCAATTCGCATTACTTATCGCATTTCGCTGCGTTCTTCATCGATGCCAGAACCAAGAGATCCGTTGTTGAAAGTTTTGCTTTAATTTTTTTGTTTACTCAGACAATACATGTTTTGTTCAAGAGT…	Exophiala aff. xenobiotica		MH863790.1 Exophiala xenobiotica strain CBS 125840 small subunit ribosomal RNA gene, partial sequence; internal transcribed spacer 1, 5.8S ribosomal RNA gene, and internal transcribed spacer 2, complete sequence; and large subunit ribosomal RNA gene, partial sequence	99.825	571	0	570	0	1	1	TACCTGATCCGAGGTCA-CCTTGTAAGCAAAAAAGGTATAGACCGGGTGCCGCCAAACCCTAGATCCGATACGTGCTCAGTTAAGAAGCTCAGTGTACCGGGGGTTCAACAGCCGCCGTCATTGTCTTTAGGAGGGGTCTAGGGGTACCTAAACCAAACCGTCCAACACCAAGCCGGGGGCTTGAGGGGTGAAAATGACGCTCGAACAGGCATGCCCTTCGGAATACCAAAGGGCGCAATGTGCGTTCAAAGATTCGATGACTCACTGGAATTCTGCAATTCGCATTACTTATCGCATTTCGCTGCGTTCTTCATCGATGCCAGAACCAAGAGATCCGTTGTTGAAAGTTTTGCTTTAATTTTTTTGTTTACTCAGACAATACATGTTTTGTTCAAGAG…	TACCTGATCCGAGGTCAACCTTGTAAGCAAAAAAGGTATAGACCGGGTGCCGCCAAACCCTAGATCCGATACGTGCTCAGTTAAGAAGCTCAGTGTACCGGGGGTTCAACAGCCGCCGTCATTGTCTTTAGGAGGGGTCTAGGGGTACCTAAACCAAACCGTCCAACACCAAGCCGGGGGCTTGAGGGGTGAAAATGACGCTCGAACAGGCATGCCCTTCGGAATACCAAAGGGCGCAATGTGCGTTCAAAGATTCGATGACTCACTGGAATTCTGCAATTCGCATTACTTATCGCATTTCGCTGCGTTCTTCATCGATGCCAGAACCAAGAGATCCGTTGTTGAAAGTTTTGCTTTAATTTTTTTGTTTACTCAGACAATACATGTTTTGTTCAAGAG…	Ascomycota	Chaetothyriales	Herpotrichiellaceae	Exophiala
2	B181	MT988152		CCGAGGTCACCTAGAAAATAAAGGTTTCAGTCGGCAGAGTTCCTCTCCTTTGMCAKACGTTCGAATAAATTCTACTACGCCTAAAGCCGGAGTGGCCTCGCCGAGGTCTTTAAGGCGCGCCCAACTAAGGACGACGCCCAATACCAAGCATAGCTTGAGTGGTGTAATGACGCTCGAACAGGCATGCCCCTCGGAATACCAAGGGGCGCAATGTGCGTTCAAAGATTCGATGATTCACTGAATTCTGCAATTCACATTACTTATCGCATTTCGCTGCGTTCTTCATCGATGCGAGAACCAAGAGATCCGTTGTTGAAAGTTTTGATTTATTCAAAATTTTAACTCAGACGACCGGTTAAATAACAAGAGTTTGGTTTAACTCTGGCGGGCGCTCGCCTG…	Aureobasidium sp.				536	0	532	2	2	2	CCGAGGTC-ACCTAG-AAAATAAAGGTTTCAGTCGGCAGAGTTCCTCTCCTTTGMCAKACGTTCGAATAAATTCTACTACGCCTAAAGCCGGAGTGGCCTCGCCGAGGTCTTTAAGGCGCGCCCAACTAAGGACGACGCCCAATACCAAGCATAGCTTGAGTGGTGTAATGACGCTCGAACAGGCATGCCCCTCGGAATACCAAGGGGCGCAATGTGCGTTCAAAGATTCGATGATTCACTGAATTCTGCAATTCACATTACTTATCGCATTTCGCTGCGTTCTTCATCGATGCGAGAACCAAGAGATCCGTTGTTGAAAGTTTTGATTTATTCAAAATTTTAACTCAGACGACCGGTTAAATAACAAGAGTTTGGTTTAACTCTGGCGGGCGCTCGCC…	CCGAGGTCAACCTAGAAAAATAAAGGTTTCAGTCGGCAGAGTTCCTCTCCTTTGACAGACGTTCGAATAAATTCTACTACGCCTAAAGCCGGAGTGGCCTCGCCGAGGTCTTTAAGGCGCGCCCAACTAAGGACGACGCCCAATACCAAGCATAGCTTGAGTGGTGTAATGACGCTCGAACAGGCATGCCCCTCGGAATACCAAGGGGCGCAATGTGCGTTCAAAGATTCGATGATTCACTGAATTCTGCAATTCACATTACTTATCGCATTTCGCTGCGTTCTTCATCGATGCGAGAACCAAGAGATCCGTTGTTGAAAGTTTTGATTTATTCAAAATTTTAACTCAGACGACCGGTTAAATAACAAGAGTTTGGTTTAACTCTGGCGGGCGCTCGCC…	Ascomycota	Dothideales	Saccotheciaceae	Aureobasidium
3	B185	MT988153		ACCTGTAAAAAATAAAGGTTTCAGTCGGCAGAAGTCCTCTCCATTGMCAGACGTTCGAATAAATTCTACTACGCCTAAAGCCGGTGAGGCCTCGCCGAGGTCTTTAAGGCGCGCCCAACTAAGGACGACGCCCAATACCAAGCATAGCTTGAGTGGTGTAATGACGCTCGAACAGGCATGCCCCTCGGAATACCAAGGGGCGCAATGTGCGTTCAAAGATTCGATGATTCACTGAATTCTGCAATTCACATTACTTATCGCATTTCGCTGCGTTCTTCATCGATGCGAGAACCAAGAGATCCGTTGTTGAAAGTTTTGATTTATTCAAAATTTTAACTCAGACGACCGGTTTAATAACAAGAGTTTGGTTTAACTCTGGCGGGCACTCGCCTGGGACGA…	Aureobasidium sp.				545	0	544	1	0	0	ACCTGTAAAAAATAAAGGTTTCAGTCGGCAGAAGTCCTCTCCATTGMCAGACGTTCGAATAAATTCTACTACGCCTAAAGCCGGTGAGGCCTCGCCGAGGTCTTTAAGGCGCGCCCAACTAAGGACGACGCCCAATACCAAGCATAGCTTGAGTGGTGTAATGACGCTCGAACAGGCATGCCCCTCGGAATACCAAGGGGCGCAATGTGCGTTCAAAGATTCGATGATTCACTGAATTCTGCAATTCACATTACTTATCGCATTTCGCTGCGTTCTTCATCGATGCGAGAACCAAGAGATCCGTTGTTGAAAGTTTTGATTTATTCAAAATTTTAACTCAGACGACCGGTTTAATAACAAGAGTTTGGTTTAACTCTGGCGGGCACTCGCCTGGGACGA…	ACCTGTAAAAAATAAAGGTTTCAGTCGGCAGAAGTCCTCTCCATTGACAGACGTTCGAATAAATTCTACTACGCCTAAAGCCGGTGAGGCCTCGCCGAGGTCTTTAAGGCGCGCCCAACTAAGGACGACGCCCAATACCAAGCATAGCTTGAGTGGTGTAATGACGCTCGAACAGGCATGCCCCTCGGAATACCAAGGGGCGCAATGTGCGTTCAAAGATTCGATGATTCACTGAATTCTGCAATTCACATTACTTATCGCATTTCGCTGCGTTCTTCATCGATGCGAGAACCAAGAGATCCGTTGTTGAAAGTTTTGATTTATTCAAAATTTTAACTCAGACGACCGGTTTAATAACAAGAGTTTGGTTTAACTCTGGCGGGCACTCGCCTGGGACGA…	Ascomycota	Dothideales	Saccotheciaceae	Aureobasidium
4	G1_010	MT988154	KT898741.1	CGAGGTCACCTAGAAAATAAAGGTTTCAGTCGGCAGAGTTCCTCTCCTTTGACAGACGTTCGAATAAATTCTACTACGCCTAAAGCCGGAGTGGCCTCGCCGAGGTCTTTAAGGCGCGCCCAACTAAGGACGACGCCCAATACCAAGCATAGCTTGAGTGGTGTAATGACGCTCGAACAGGCATGCCCCTCGGAATACCAAGGGGCGCAATGTGCGTTCAAAGATTCGATGATTCACTGAATTCTGCAATTCACATTACTTATCGCATTTCGCTGCGTTCTTCATCGATGCGAGAACCAAGAGATCCGTTGTTGAAAGTTTTGATTTATTCAAAATTTTAACTCAGACGACCGGTTAAATAACAAGAGTTTGGTTTAACTCTGGCGGGCGCTCGCCTGG…	Aureobasidium sp.		KT898741.1 Aureobasidium pullulans strain A175 18S ribosomal RNA gene, partial sequence; internal transcribed spacer 1 and 5.8S ribosomal RNA gene, complete sequence; and internal transcribed spacer 2, partial sequence	100	531	0	531	0	0	0	CGAGGTCACCTAGAAAATAAAGGTTTCAGTCGGCAGAGTTCCTCTCCTTTGACAGACGTTCGAATAAATTCTACTACGCCTAAAGCCGGAGTGGCCTCGCCGAGGTCTTTAAGGCGCGCCCAACTAAGGACGACGCCCAATACCAAGCATAGCTTGAGTGGTGTAATGACGCTCGAACAGGCATGCCCCTCGGAATACCAAGGGGCGCAATGTGCGTTCAAAGATTCGATGATTCACTGAATTCTGCAATTCACATTACTTATCGCATTTCGCTGCGTTCTTCATCGATGCGAGAACCAAGAGATCCGTTGTTGAAAGTTTTGATTTATTCAAAATTTTAACTCAGACGACCGGTTAAATAACAAGAGTTTGGTTTAACTCTGGCGGGCGCTCGCCTGG…	CGAGGTCACCTAGAAAATAAAGGTTTCAGTCGGCAGAGTTCCTCTCCTTTGACAGACGTTCGAATAAATTCTACTACGCCTAAAGCCGGAGTGGCCTCGCCGAGGTCTTTAAGGCGCGCCCAACTAAGGACGACGCCCAATACCAAGCATAGCTTGAGTGGTGTAATGACGCTCGAACAGGCATGCCCCTCGGAATACCAAGGGGCGCAATGTGCGTTCAAAGATTCGATGATTCACTGAATTCTGCAATTCACATTACTTATCGCATTTCGCTGCGTTCTTCATCGATGCGAGAACCAAGAGATCCGTTGTTGAAAGTTTTGATTTATTCAAAATTTTAACTCAGACGACCGGTTAAATAACAAGAGTTTGGTTTAACTCTGGCGGGCGCTCGCCTGG…	Ascomycota	Dothideales	Saccotheciaceae	Aureobasidium
5	G1_011	MT988155	MG669476.1	GTCACCTAGAAAAATAAAGGTTTCAGTCGGCAGAGTTCCTCTCCTTTGACAGACGTTCGAATAAATTCTACTACGCCTAAAGCCGGAGTGGCCTCGCCGAGGTCTTTAAGGCGCGCCCAACTAAGGACGACGCCCAATACCAAGCATAGCTTGAGTGGTGTAATGACGCTCGAACAGGCATGCCCCTCGGAATACCAAGGGGCGCAATGTGCGTTCAAAGATTCGATGATTCACTGAATTCTGCAATTCACATTACTTATCGCATTTCGCTGCGTTCTTCATCGATGCGAGAACCAAGAGATCCGTTGTTGAAAGTTTTGATTTATTCAAAATTTTAACTCAGACGACCGGTTAAATAACAAGAGTTTGGTTTAACTCTGGCGGGCGCTCGCCTGGGAC…	Aureobasidium sp.		MG669476.1 Aureobasidium pullulans isolate LW14 small subunit ribosomal RNA gene, partial sequence; internal transcribed spacer 1 and 5.8S ribosomal RNA gene, complete sequence; and internal transcribed spacer 2, partial sequence	100	528	0	528	0	0	0	GTCACCTAGAAAAATAAAGGTTTCAGTCGGCAGAGTTCCTCTCCTTTGACAGACGTTCGAATAAATTCTACTACGCCTAAAGCCGGAGTGGCCTCGCCGAGGTCTTTAAGGCGCGCCCAACTAAGGACGACGCCCAATACCAAGCATAGCTTGAGTGGTGTAATGACGCTCGAACAGGCATGCCCCTCGGAATACCAAGGGGCGCAATGTGCGTTCAAAGATTCGATGATTCACTGAATTCTGCAATTCACATTACTTATCGCATTTCGCTGCGTTCTTCATCGATGCGAGAACCAAGAGATCCGTTGTTGAAAGTTTTGATTTATTCAAAATTTTAACTCAGACGACCGGTTAAATAACAAGAGTTTGGTTTAACTCTGGCGGGCGCTCGCCTGGGAC…	GTCACCTAGAAAAATAAAGGTTTCAGTCGGCAGAGTTCCTCTCCTTTGACAGACGTTCGAATAAATTCTACTACGCCTAAAGCCGGAGTGGCCTCGCCGAGGTCTTTAAGGCGCGCCCAACTAAGGACGACGCCCAATACCAAGCATAGCTTGAGTGGTGTAATGACGCTCGAACAGGCATGCCCCTCGGAATACCAAGGGGCGCAATGTGCGTTCAAAGATTCGATGATTCACTGAATTCTGCAATTCACATTACTTATCGCATTTCGCTGCGTTCTTCATCGATGCGAGAACCAAGAGATCCGTTGTTGAAAGTTTTGATTTATTCAAAATTTTAACTCAGACGACCGGTTAAATAACAAGAGTTTGGTTTAACTCTGGCGGGCGCTCGCCTGGGAC…	Ascomycota	Dothideales	Saccotheciaceae	Aureobasidium
6	G1_012	MT988156	MG845226.1	TGATCCGAGGTCACCTAGAAAATAAAGGTTTCAGTCGGCAGAGTTCCTCTCCTTTGACAGACGTTCGAATAAATTCTACTACGCCTAAAGCCGGAGTGGCCTCGCCGAGGTCTTTAAGGCGCGCCCAACTAAGGACGACGCCCAATACCAAGCATAGCTTGAGTGGTGTAATGACGCTCGAACAGGCATGCCCCTCGGAATACCAAGGGGCGCAATGTGCGTTCAAAGATTCGATGATTCACTGAATTCTGCAATTCACATTACTTATCGCATTTCGCTGCGTTCTTCATCGATGCGAGAACCAAGAGATCCGTTGTTGAAAGTTTTGATTTATTCAAAATTTTAACTCAGACGACCGGTTAAATAACAAGAGTTTGGTTTAACTCTGGCGGGCGCTCG…	Aureobasidium sp.		MG845226.1 Aureobasidium sp. strain NR88 small subunit ribosomal RNA gene, partial sequence; internal transcribed spacer 1 and 5.8S ribosomal RNA gene, complete sequence; and internal transcribed spacer 2, partial sequence	100	536	0	536	0	0	0	TGATCCGAGGTCACCTAGAAAATAAAGGTTTCAGTCGGCAGAGTTCCTCTCCTTTGACAGACGTTCGAATAAATTCTACTACGCCTAAAGCCGGAGTGGCCTCGCCGAGGTCTTTAAGGCGCGCCCAACTAAGGACGACGCCCAATACCAAGCATAGCTTGAGTGGTGTAATGACGCTCGAACAGGCATGCCCCTCGGAATACCAAGGGGCGCAATGTGCGTTCAAAGATTCGATGATTCACTGAATTCTGCAATTCACATTACTTATCGCATTTCGCTGCGTTCTTCATCGATGCGAGAACCAAGAGATCCGTTGTTGAAAGTTTTGATTTATTCAAAATTTTAACTCAGACGACCGGTTAAATAACAAGAGTTTGGTTTAACTCTGGCGGGCGCTCG…	TGATCCGAGGTCACCTAGAAAATAAAGGTTTCAGTCGGCAGAGTTCCTCTCCTTTGACAGACGTTCGAATAAATTCTACTACGCCTAAAGCCGGAGTGGCCTCGCCGAGGTCTTTAAGGCGCGCCCAACTAAGGACGACGCCCAATACCAAGCATAGCTTGAGTGGTGTAATGACGCTCGAACAGGCATGCCCCTCGGAATACCAAGGGGCGCAATGTGCGTTCAAAGATTCGATGATTCACTGAATTCTGCAATTCACATTACTTATCGCATTTCGCTGCGTTCTTCATCGATGCGAGAACCAAGAGATCCGTTGTTGAAAGTTTTGATTTATTCAAAATTTTAACTCAGACGACCGGTTAAATAACAAGAGTTTGGTTTAACTCTGGCGGGCGCTCG…	Ascomycota	Dothideales	Saccotheciaceae	Aureobasidium
7	G1_013	MT988157	KY436109.1	GAGGTCACCTAGAAAAATAAAGGTTTCAGTCGGCAGAGTTCCTCTCCTTTGACAGACGTTCGAATAAATTCTACTACGCCTAAAGCCGGAGTGGCCTCGCCGAGGTCTTTAAGGCGCGCCCAACTAAGGACGACGCCCAATACCAAGCATAGCTTGAGTGGTGTAATGACGCTCGAACAGGCATGCCCCTCGGAATACCAAGGGGCGCAATGTGCGTTCAAAGATTCGATGATTCACTGAATTCTGCAATTCACATTACTTATCGCATTTCGCTGCGTTCTTCATCGATGCGAGAACCAAGAGATCCGTTGTTGAAAGTTTTGATTTATTCAAAATTTTAACTCAGACGACCGGTTAAATAACAAGAGTTTGGTTTAACTCTGGCGGGCGCTCGCCTGG…	Aureobasidium sp.		KY436109.1 Aureobasidium sp. isolate PCR50 18S ribosomal RNA gene, partial sequence; internal transcribed spacer 1, 5.8S ribosomal RNA gene, and internal transcribed spacer 2, complete sequence; and 28S ribosomal RNA gene, partial sequence	100	531	0	531	0	0	0	GAGGTCACCTAGAAAAATAAAGGTTTCAGTCGGCAGAGTTCCTCTCCTTTGACAGACGTTCGAATAAATTCTACTACGCCTAAAGCCGGAGTGGCCTCGCCGAGGTCTTTAAGGCGCGCCCAACTAAGGACGACGCCCAATACCAAGCATAGCTTGAGTGGTGTAATGACGCTCGAACAGGCATGCCCCTCGGAATACCAAGGGGCGCAATGTGCGTTCAAAGATTCGATGATTCACTGAATTCTGCAATTCACATTACTTATCGCATTTCGCTGCGTTCTTCATCGATGCGAGAACCAAGAGATCCGTTGTTGAAAGTTTTGATTTATTCAAAATTTTAACTCAGACGACCGGTTAAATAACAAGAGTTTGGTTTAACTCTGGCGGGCGCTCGCCTGG…	GAGGTCACCTAGAAAAATAAAGGTTTCAGTCGGCAGAGTTCCTCTCCTTTGACAGACGTTCGAATAAATTCTACTACGCCTAAAGCCGGAGTGGCCTCGCCGAGGTCTTTAAGGCGCGCCCAACTAAGGACGACGCCCAATACCAAGCATAGCTTGAGTGGTGTAATGACGCTCGAACAGGCATGCCCCTCGGAATACCAAGGGGCGCAATGTGCGTTCAAAGATTCGATGATTCACTGAATTCTGCAATTCACATTACTTATCGCATTTCGCTGCGTTCTTCATCGATGCGAGAACCAAGAGATCCGTTGTTGAAAGTTTTGATTTATTCAAAATTTTAACTCAGACGACCGGTTAAATAACAAGAGTTTGGTTTAACTCTGGCGGGCGCTCGCCTGG…	Ascomycota	Dothideales	Saccotheciaceae	Aureobasidium
8	B159	MT988158	NR_154518.1	GTGATTTAACGGCCGTGAGGGCTCGAAAACTCCSCGGCGAGACGTAATGCCACAACGCTGGGAGACGAGACCGCTCAGCCGGAGACTTTGAGGCGCGCGGGGGATTGCTCCTCCGCGAGACGCCCAATACCCAGCGAGGCTGGAGTGGTGTAATGACGCTCGAACGGGCATGCCCCCCGGAATACCAGGGGGCGCAATGTGCGTTCAAAGATTCGATGATTCACTGAATTCTGCAATTCACATTACTTATCGCATTTCGCTGCGTTCTTCATCGATGCCAGAACCAAGAGATCCGTTGTTGAAAGTTTTGTTTCGATTTACTCGTAAACTCCGACGCAAAGATGCAGTGTTGAGTGGTCCTCCGGGGGCGCCGGTCAGGGTCGCCCCCGAAGCAACGGG…	Xenoramularia aff. neerlandica		NR_154518.1 Xenoramularia neerlandica CPC 18377 ITS region; from TYPE material	98.242	512	0	503	7	2	2	GTGATTTAACGGCCGTGAGGGCTCGAAAACTCCSCGGCGAGACGTAATGCCACAACGCTGGGAGACGAGACCGCTCAGCCGGAGACTTTGAGGCGCGCGGGGGATTGCTCCTCCGCGAGACGCCCAATACCCAGCGAGGCTGGAGTGGTGTAATGACGCTCGAACGGGCATGCCCCCCGGAATACCAGGGGGCGCAATGTGCGTTCAAAGATTCGATGATTCACTGAATTCTGCAATTCACATTACTTATCGCATTTCGCTGCGTTCTTCATCGATGCCAGAACCAAGAGATCCGTTGTTGAAAGTTTTGTTTCGATTTACTCGTAAACTCCGACGCAAAGATGCAGTGTTGA-GTGGTCCTCCGGGGGCGCCGGTCAGGGTCGCCCCCGAAGCAACGG…	GTGATTTAACGGCCGTGAGGGCTCGAAA-CTCCGCGGCGAGACGTGATGCCACAACGCTGGGAGACGAGACCGCTCAGCCGGAGACTTTGAGGCGCGCGGGGGATTGCTCCCCCGCGAGACGCCCAATACCCAGCGAGGCTGGAGTGGTGTAATGACGCTCGAACGGGCATGCCCCCCGGAATACCAGGGGGCGCAATGTGCGTTCAAAGATTCGATGATTCACTGAATTCTGCAATTCACATTACTTATCGCATTTCGCTGCGTTCTTCATCGATGCCAGAACCAAGAGATCCGTTGTTGAAAGTTTTGTTTCGATTTACTCGTAAACTCCGACGCAAAGATGCAGTGTTTAAGTGGTCCTCCGGGGGCGCCCGGCAGGGTCGCCCCCGAAGCAACGG…	Ascomycota	Mycosphaerellales	Mycosphaerellaceae	Xenoramularia
9	B070	MT988159	NR_155224.1	GAGGTCAACTTTGTTTGTTGTTGTAAGGCCGAGCCTGTGTAATAAACAAATACTTTACTGGTCAACGAGTTGGATAAACCTAATACATTGAAAACAGTTCAGCACTATCTAGTACCACTCATGCCAATACATTTCAAGCAAACGCTTAGTCTGACTAAGAGTATCACTCAAAACCAAATCCGAAGATTTGAGAGAGAAATGACGCTCAAACAGGCATGCCCTTTGGAATACCAAAGGGCGCAATGTGCGTTCAAAGATTCGATGATTCACGAAAATCTGCAATTCATATTACTTATCGCATTTCGCTGCGTTCTTCATCGATGCGAGAACCAAGAGATCCGTTGTTGAAAGTTTTGAAGATTTTTGATATTAATCAACAAATTGACAATAAAATTAAAA…	[Candida] aff. oleophila	[Candida] railenensis; NR_077080.1; MK267798.1; MK267799.1; MK268152.1	NR_155224.1 [Candida] oleophila CBS 2219 ITS region; from TYPE material >KY102254.1 [Candida] oleophila culture CBS:2219 small subunit ribosomal RNA gene, partial sequence; internal transcribed spacer 1, 5.8S ribosomal RNA gene, and internal transcribed spacer 2, complete sequence; and large subunit ribosomal RNA gene, partial sequence	100	585	0	585	0	0	0	GAGGTCAACTTTGTTTGTTGTTGTAAGGCCGAGCCTGTGTAATAAACAAATACTTTACTGGTCAACGAGTTGGATAAACCTAATACATTGAAAACAGTTCAGCACTATCTAGTACCACTCATGCCAATACATTTCAAGCAAACGCTTAGTCTGACTAAGAGTATCACTCAAAACCAAATCCGAAGATTTGAGAGAGAAATGACGCTCAAACAGGCATGCCCTTTGGAATACCAAAGGGCGCAATGTGCGTTCAAAGATTCGATGATTCACGAAAATCTGCAATTCATATTACTTATCGCATTTCGCTGCGTTCTTCATCGATGCGAGAACCAAGAGATCCGTTGTTGAAAGTTTTGAAGATTTTTGATATTAATCAACAAATTGACAATAAAATTAAAA…	GAGGTCAACTTTGTTTGTTGTTGTAAGGCCGAGCCTGTGTAATAAACAAATACTTTACTGGTCAACGAGTTGGATAAACCTAATACATTGAAAACAGTTCAGCACTATCTAGTACCACTCATGCCAATACATTTCAAGCAAACGCTTAGTCTGACTAAGAGTATCACTCAAAACCAAATCCGAAGATTTGAGAGAGAAATGACGCTCAAACAGGCATGCCCTTTGGAATACCAAAGGGCGCAATGTGCGTTCAAAGATTCGATGATTCACGAAAATCTGCAATTCATATTACTTATCGCATTTCGCTGCGTTCTTCATCGATGCGAGAACCAAGAGATCCGTTGTTGAAAGTTTTGAAGATTTTTGATATTAATCAACAAATTGACAATAAAATTAAAA…	Ascomycota	Saccharomycetales	Debaryomycetaceae	[Candida]
10	B071	MT988160	NR_155224.1	CTTTGTTTGTTGTTGTAAGGCCGAGCCTGTGTAATAAACAAATACTTTACTGGTCAACGAGTTGGATAAACCTAATACATTGAAAACAGTTCAGCACTATCTAGTACCACTCATGCCAATACATTTCAAGCAAACGCTTAGTCTGACTAAGAGTATCACTCAAAACCAAATCCGAAGATTTGAGAGAGAAATGACGCTCAAACAGGCATGCCCTTTGGAATACCAAAGGGCGCAATGTGCGTTCAAAGATTCGATGATTCACGAAAATCTGCAATTCATATTACTTATCGCATTTCGCTGCGTTCTTCATCGATGCGAGAACCAAGAGATCCGTTGTTGAAAGTTTTGAAGATTTTTGATATTAATCAACAAATTGACAATAAAATTAAAATAACAATT…	[Candida] aff. oleophila	[Candida] railenensis; NR_077080.1; MK267798.1; MK267799.1; MK268152.1	NR_155224.1 [Candida] oleophila CBS 2219 ITS region; from TYPE material >KY102254.1 [Candida] oleophila culture CBS:2219 small subunit ribosomal RNA gene, partial sequence; internal transcribed spacer 1, 5.8S ribosomal RNA gene, and internal transcribed spacer 2, complete sequence; and large subunit ribosomal RNA gene, partial sequence	100	577	0	577	0	0	0	CTTTGTTTGTTGTTGTAAGGCCGAGCCTGTGTAATAAACAAATACTTTACTGGTCAACGAGTTGGATAAACCTAATACATTGAAAACAGTTCAGCACTATCTAGTACCACTCATGCCAATACATTTCAAGCAAACGCTTAGTCTGACTAAGAGTATCACTCAAAACCAAATCCGAAGATTTGAGAGAGAAATGACGCTCAAACAGGCATGCCCTTTGGAATACCAAAGGGCGCAATGTGCGTTCAAAGATTCGATGATTCACGAAAATCTGCAATTCATATTACTTATCGCATTTCGCTGCGTTCTTCATCGATGCGAGAACCAAGAGATCCGTTGTTGAAAGTTTTGAAGATTTTTGATATTAATCAACAAATTGACAATAAAATTAAAATAACAATT…	CTTTGTTTGTTGTTGTAAGGCCGAGCCTGTGTAATAAACAAATACTTTACTGGTCAACGAGTTGGATAAACCTAATACATTGAAAACAGTTCAGCACTATCTAGTACCACTCATGCCAATACATTTCAAGCAAACGCTTAGTCTGACTAAGAGTATCACTCAAAACCAAATCCGAAGATTTGAGAGAGAAATGACGCTCAAACAGGCATGCCCTTTGGAATACCAAAGGGCGCAATGTGCGTTCAAAGATTCGATGATTCACGAAAATCTGCAATTCATATTACTTATCGCATTTCGCTGCGTTCTTCATCGATGCGAGAACCAAGAGATCCGTTGTTGAAAGTTTTGAAGATTTTTGATATTAATCAACAAATTGACAATAAAATTAAAATAACAATT…	Ascomycota	Saccharomycetales	Debaryomycetaceae	[Candida]
11	B094	MT988161	NR_155224.1	TTGAGGTCAACTTTGTTTGTTGTTGTAAGGCCGAGCCTGTGTAATAAACAAATACTTTACTGGTCAACGAGTTGGATAAACCTAATACATTGAAAACAGTTCAGCACTATCTAGTACCACTCATGCCAATACATTTCAAGCAAACGCTTAGTCTGACTAAGAGTATCACTCAAAACCAAATCCGAAGATTTGAGAGAGAAATGACGCTCAAACAGGCATGCCCTTTGGAATACCAAAGGGCGCAATGTGCGTTCAAAGATTCGATGATTCACGAAAATCTGCAATTCATATTACTTATCGCATTTCGCTGCGTTCTTCATCGATGCGAGAACCAAGAGATCCGTTGTTGAAAGTTTTGAAGATTTTTGATATTAATCAACAAATTGACAATAAAATTAA…	[Candida] aff. oleophila	[Candida] railenensis; NR_077080.1; MK267798.1; MK267799.1; MK268152.1	NR_155224.1 [Candida] oleophila CBS 2219 ITS region; from TYPE material >KY102254.1 [Candida] oleophila culture CBS:2219 small subunit ribosomal RNA gene, partial sequence; internal transcribed spacer 1, 5.8S ribosomal RNA gene, and internal transcribed spacer 2, complete sequence; and large subunit ribosomal RNA gene, partial sequence	99.828	580	0	579	0	1	1	TTGAGGTCAACTTTGTTTGTTGTTGTAAGGCCGAGCCTGTGTAATAAACAAATACTTTACTGGTCAACGAGTTGGATAAACCTAATACATTGAAAACAGTTCAGCACTATCTAGTACCACTCATGCCAATACATTTCAAGCAAACGCTTAGTCTGACTAAGAGTATCACTCAAAACCAAATCCGAAGATTTGAGAGAGAAATGACGCTCAAACAGGCATGCCCTTTGGAATACCAAAGGGCGCAATGTGCGTTCAAAGATTCGATGATTCACGAAAATCTGCAATTCATATTACTTATCGCATTTCGCTGCGTTCTTCATCGATGCGAGAACCAAGAGATCCGTTGTTGAAAGTTTTGAAGATTTTTGATATTAATCAACAAATTGACAATAAAATTAA…	TTGAGGTCAACTTTGTTTGTTGTTGTAAGGCCGAGCCTGTGTAATAAACAAATACTTTACTGGTCAACGAGTTGGATAAACCTAATACATTGAAAACAGTTCAGCACTATCTAGTACCACTCATGCCAATACATTTCAAGCAAACGCTTAGTCTGACTAAGAGTATCACTCAAAACCAAATCCGAAGATTTGAGAGAGAAATGACGCTCAAACAGGCATGCCCTTTGGAATACCAAAGGGCGCAATGTGCGTTCAAAGATTCGATGATTCACGAAAATCTGCAATTCATATTACTTATCGCATTTCGCTGCGTTCTTCATCGATGCGAGAACCAAGAGATCCGTTGTTGAAAGTTTTGAAGATTTTTGATATTAATCAACAAATTGACAATAAAATTAA…	Ascomycota	Saccharomycetales	Debaryomycetaceae	[Candida]
12	B073	MT988162	NR_077080.1	CGAGCCTGTGTAATAAACAAATACTTTACTGGGTCAATGAGTTGGATAAACCTAATACATTGAAAACAGTTCAGCACTATCTAGTACCACTCATGCCAATACATTTCAAGCAAACGCTTAGTCTGACTAAGAGTATCACTCAAAACCAAATCCGAAGATTTGAGAGAGAAATGACGCTCAAACAGGCATGCCCTTTGGAATACCAAAGGGCGCAATGTGCGTTCAAAGATTCGATGATTCACGAAAATCTGCAATTCATATTACTTATCGCATTTCGCTGCGTTCTTCATCGATGCGAGAACCAAGAGATCCGTTGTTGAAAGTTTTGAAGATTTTTGATATTAATCAACAAATTGACATAAAATTAAAAATAACAATTCAATAATAAATATTGAAGTT…	[Candida] aff. railenensis	[Candida] railenensis; NR_077080.1; MK267798.1; MK267799.1; MK268152.1	NR_077080.1 [Candida] railenensis CBS 8164 ITS region; from TYPE material >EU343803.1 [Candida] railenensis strain CBS 8164 18S ribosomal RNA gene, partial sequence; internal transcribed spacer 1, 5.8S ribosomal RNA gene, and internal transcribed spacer 2, complete sequence; and 28S ribosomal RNA gene, partial sequence >KJ706228.1 Candida railenensis strain DBMY8 18S ribosomal RNA gene, partial s…	99.818	549	0	548	0	1	1	CGAGCCTGTGTAATAAACAAATACTTTACTGGGTCAATGAGTTGGATAAACCTAATACATTGAAAACAGTTCAGCACTATCTAGTACCACTCATGCCAATACATTTCAAGCAAACGCTTAGTCTGACTAAGAGTATCACTCAAAACCAAATCCGAAGATTTGAGAGAGAAATGACGCTCAAACAGGCATGCCCTTTGGAATACCAAAGGGCGCAATGTGCGTTCAAAGATTCGATGATTCACGAAAATCTGCAATTCATATTACTTATCGCATTTCGCTGCGTTCTTCATCGATGCGAGAACCAAGAGATCCGTTGTTGAAAGTTTTGAAGATTTTTGATATTAATCAACAAATTGACATAAAATTAAAAATAACAATTCAATAATAAATATTGAAGTT…	CGAGCCTGTGTAATAAACAAATACTTTACTGG-TCAATGAGTTGGATAAACCTAATACATTGAAAACAGTTCAGCACTATCTAGTACCACTCATGCCAATACATTTCAAGCAAACGCTTAGTCTGACTAAGAGTATCACTCAAAACCAAATCCGAAGATTTGAGAGAGAAATGACGCTCAAACAGGCATGCCCTTTGGAATACCAAAGGGCGCAATGTGCGTTCAAAGATTCGATGATTCACGAAAATCTGCAATTCATATTACTTATCGCATTTCGCTGCGTTCTTCATCGATGCGAGAACCAAGAGATCCGTTGTTGAAAGTTTTGAAGATTTTTGATATTAATCAACAAATTGACATAAAATTAAAAATAACAATTCAATAATAAATATTGAAGTT…	Ascomycota	Saccharomycetales	Debaryomycetaceae	[Candida]
13	B092	MT988192	MH918800.1	ACTCACTTATCCCTCCCTAGATCAACACCGAGTTGGTAAAACCTAATACAGTATTAACCCCCGCCGCTCGCGCAAACGAGCAGCAGATTAATAGAGAAGCTTGCGCTCGTGTCCCACATACTGATATGGCCTACAATTTCAAGTTAACTCAWWAACGAGAGTATCACTCACTACCAAACACAAYGTGTTTGAGAAGGAAATGACGCTCAAACAGGCATGCCCCCCGGAATACCAGAGGGCGCAATGTGCGTTCAAAGATTCGATGATTCACGGAATTCTGCAATTCACATTACGTATCGCATTTCGCTGCGTTCTTCATCGATGCGAGAACCAAGAGATCCATTRTTGAAAGTTTTGAAGTTGTTTTCTACTAAAAGAAATCTTGTGTTGACTGAATTA…	[Candida] glabrata		MH918800.1 [Candida] glabrata voucher CG-3PI internal transcribed spacer 1, partial sequence; 5.8S ribosomal RNA gene, complete sequence; and internal transcribed spacer 2, partial sequence	99.103	446	0	442	4	0	0	ACTCACTTATCCCTCCCTAGATCAACACCGAGTTGGTAAAACCTAATACAGTATTAACCCCCGCCGCTCGCGCAAACGAGCAGCAGATTAATAGAGAAGCTTGCGCTCGTGTCCCACATACTGATATGGCCTACAATTTCAAGTTAACTCAWWAACGAGAGTATCACTCACTACCAAACACAAYGTGTTTGAGAAGGAAATGACGCTCAAACAGGCATGCCCCCCGGAATACCAGAGGGCGCAATGTGCGTTCAAAGATTCGATGATTCACGGAATTCTGCAATTCACATTACGTATCGCATTTCGCTGCGTTCTTCATCGATGCGAGAACCAAGAGATCCATTRTTGAAAGTTTTGAAGTTGTTTTCTACTAAAAGAAATCTTGTGTTGACTGAATTA…	ACTCACTTATCCCTCCCTAGATCAACACCGAGTTGGTAAAACCTAATACAGTATTAACCCCCGCCGCTCGCGCAAACGAGCAGCAGATTAATAGAGAAGCTTGCGCTCGTGTCCCACATACTGATATGGCCTACAATTTCAAGTTAACTCAAAAACGAGAGTATCACTCACTACCAAACACAATGTGTTTGAGAAGGAAATGACGCTCAAACAGGCATGCCCCCCGGAATACCAGAGGGCGCAATGTGCGTTCAAAGATTCGATGATTCACGGAATTCTGCAATTCACATTACGTATCGCATTTCGCTGCGTTCTTCATCGATGCGAGAACCAAGAGATCCATTGTTGAAAGTTTTGAAGTTGTTTTCTACTAAAAGAAATCTTGTGTTGACTGAATTA…	Ascomycota	Saccharomycetales	Saccharomycetaceae	[Candida]
14	B093	MT988193	MH918800.1	TTAAAGACGTCTGTCTGCCCAGCACGCACARAACACTCACTTATCCCTCCCTAGATCAACACCGAGTTGGTAAAACCTAATACAGTATTAACCCCCGCCGCTCGCGCAAACGAGCAGCAGATTAATAGAGAAGCTTGCGCTCGTGTCCCACATACTGATATGGCCTACAATTTCAAGTTAACTCAAAAACGAGAGTATCACTCACTACCAAACACAAYGTGTTTGAGAAGGAAATGACGCTCAAACAGGCATGCCCCCCGGAATACCAGAGGGCGCAATGTGCGTTCAAAGATTCGATGATTCACGGAATTCTGCAATTCACATTACGTATCGCATTTCGCTGCGTTCTTCATCGATGCGAGAACCAAGAGATCCATTRTTGAAAGTTTTGAAGTTGTT…	[Candida] glabrata		MH918800.1 [Candida] glabrata voucher CG-3PI internal transcribed spacer 1, partial sequence; 5.8S ribosomal RNA gene, complete sequence; and internal transcribed spacer 2, partial sequence	99.375	480	0	477	3	0	0	TTAAAGACGTCTGTCTGCCCAGCACGCACARAACACTCACTTATCCCTCCCTAGATCAACACCGAGTTGGTAAAACCTAATACAGTATTAACCCCCGCCGCTCGCGCAAACGAGCAGCAGATTAATAGAGAAGCTTGCGCTCGTGTCCCACATACTGATATGGCCTACAATTTCAAGTTAACTCAAAAACGAGAGTATCACTCACTACCAAACACAAYGTGTTTGAGAAGGAAATGACGCTCAAACAGGCATGCCCCCCGGAATACCAGAGGGCGCAATGTGCGTTCAAAGATTCGATGATTCACGGAATTCTGCAATTCACATTACGTATCGCATTTCGCTGCGTTCTTCATCGATGCGAGAACCAAGAGATCCATTRTTGAAAGTTTTGAAGTTGTT…	TTAAAGACGTCTGTCTGCCCAGCACGCACAGAACACTCACTTATCCCTCCCTAGATCAACACCGAGTTGGTAAAACCTAATACAGTATTAACCCCCGCCGCTCGCGCAAACGAGCAGCAGATTAATAGAGAAGCTTGCGCTCGTGTCCCACATACTGATATGGCCTACAATTTCAAGTTAACTCAAAAACGAGAGTATCACTCACTACCAAACACAATGTGTTTGAGAAGGAAATGACGCTCAAACAGGCATGCCCCCCGGAATACCAGAGGGCGCAATGTGCGTTCAAAGATTCGATGATTCACGGAATTCTGCAATTCACATTACGTATCGCATTTCGCTGCGTTCTTCATCGATGCGAGAACCAAGAGATCCATTGTTGAAAGTTTTGAAGTTGTT…	Ascomycota	Saccharomycetales	Saccharomycetaceae	[Candida]
15	B102	MT988194	KJ009319.1	CAACTTAAAGACGTCTGTCTGCCCAGCACGCACARAACACTCACTTATCCCTCCCTAGATCAACACCGAGTTGGTAAAACCTAATACAGTATTAACCCCCGCCGCTCGCGCAAACGAGCAGCAGATTAATAGAGAAGCTTGCGCTCGTGTCCCACATACTGATATGGCCTACAATTTCAAGTTAACTCAAAAACGAGAGTATCACTCACTACCAAACACAAYGTGTTTGAGAAGGAAATGACGCTCAAACAGGCATGCCCCCCGGAATACCAGAGGGCGCAATGTGCGTTCAAAGATTCGATGATTCACGGAATTCTGCAATTCACATTACGTATCGCATTTCGCTGCGTTCTTCATCGATGCGAGAACCAAGAGATCCATTRTTGAAAGTTTTGAAGT…	[Candida] glabrata		KJ009319.1 Candida glabrata strain CBS 12440 internal transcribed spacer 1, partial sequence; 5.8S ribosomal RNA gene and internal transcribed spacer 2, complete sequence; and 28S ribosomal RNA gene, partial sequence	99.38	484	0	481	3	0	0	CAACTTAAAGACGTCTGTCTGCCCAGCACGCACARAACACTCACTTATCCCTCCCTAGATCAACACCGAGTTGGTAAAACCTAATACAGTATTAACCCCCGCCGCTCGCGCAAACGAGCAGCAGATTAATAGAGAAGCTTGCGCTCGTGTCCCACATACTGATATGGCCTACAATTTCAAGTTAACTCAAAAACGAGAGTATCACTCACTACCAAACACAAYGTGTTTGAGAAGGAAATGACGCTCAAACAGGCATGCCCCCCGGAATACCAGAGGGCGCAATGTGCGTTCAAAGATTCGATGATTCACGGAATTCTGCAATTCACATTACGTATCGCATTTCGCTGCGTTCTTCATCGATGCGAGAACCAAGAGATCCATTRTTGAAAGTTTTGAAGT…	CAACTTAAAGACGTCTGTCTGCCCAGCACGCACAAAACACTCACTTATCCCTCCCTAGATCAACACCGAGTTGGTAAAACCTAATACAGTATTAACCCCCGCCGCTCGCGCAAACGAGCAGCAGATTAATAGAGAAGCTTGCGCTCGTGTCCCACATACTGATATGGCCTACAATTTCAAGTTAACTCAAAAACGAGAGTATCACTCACTACCAAACACAACGTGTTTGAGAAGGAAATGACGCTCAAACAGGCATGCCCCCCGGAATACCAGAGGGCGCAATGTGCGTTCAAAGATTCGATGATTCACGGAATTCTGCAATTCACATTACGTATCGCATTTCGCTGCGTTCTTCATCGATGCGAGAACCAAGAGATCCATTGTTGAAAGTTTTGAAGT…	Ascomycota	Saccharomycetales	Saccharomycetaceae	[Candida]
16	B104	MT988195	MH918800.1	AACTTAAAGACGTCTGTCTGCCCAGCACGCACARAACACTCACTTATCCCTCCCTAGATCAACACCGAGTTGGTAAAACCTAATACAGTATTAACCCCCGCCGCTCGCGCAAACGAGCAGCAGATTAATAGAGAAGCTTGCGCTCGTGTCCCACATACTGATATGGCCTACAATTTCAAGTTAACTCAAAAACGAGAGTATCACTCACTACCAAACACAAYGTGTTTGAGAAGGAAATGACGCTCAAACAGGCATGCCCCCCGGAATACCAGAGGGCGCAATGTGCGTTCAAAGATTCGATGATTCACGGAATTCTGCAATTCACATTACGTATCGCATTTCGCTGCGTTCTTCATCGATGCGAGAACCAAGAGATCCATTRTTGAAAGTTTTGAAGTT…	[Candida] glabrata		MH918800.1 [Candida] glabrata voucher CG-3PI internal transcribed spacer 1, partial sequence; 5.8S ribosomal RNA gene, complete sequence; and internal transcribed spacer 2, partial sequence	99.379	483	0	480	3	0	0	AACTTAAAGACGTCTGTCTGCCCAGCACGCACARAACACTCACTTATCCCTCCCTAGATCAACACCGAGTTGGTAAAACCTAATACAGTATTAACCCCCGCCGCTCGCGCAAACGAGCAGCAGATTAATAGAGAAGCTTGCGCTCGTGTCCCACATACTGATATGGCCTACAATTTCAAGTTAACTCAAAAACGAGAGTATCACTCACTACCAAACACAAYGTGTTTGAGAAGGAAATGACGCTCAAACAGGCATGCCCCCCGGAATACCAGAGGGCGCAATGTGCGTTCAAAGATTCGATGATTCACGGAATTCTGCAATTCACATTACGTATCGCATTTCGCTGCGTTCTTCATCGATGCGAGAACCAAGAGATCCATTRTTGAAAGTTTTGAAGTT…	AACTTAAAGACGTCTGTCTGCCCAGCACGCACAGAACACTCACTTATCCCTCCCTAGATCAACACCGAGTTGGTAAAACCTAATACAGTATTAACCCCCGCCGCTCGCGCAAACGAGCAGCAGATTAATAGAGAAGCTTGCGCTCGTGTCCCACATACTGATATGGCCTACAATTTCAAGTTAACTCAAAAACGAGAGTATCACTCACTACCAAACACAATGTGTTTGAGAAGGAAATGACGCTCAAACAGGCATGCCCCCCGGAATACCAGAGGGCGCAATGTGCGTTCAAAGATTCGATGATTCACGGAATTCTGCAATTCACATTACGTATCGCATTTCGCTGCGTTCTTCATCGATGCGAGAACCAAGAGATCCATTGTTGAAAGTTTTGAAGTT…	Ascomycota	Saccharomycetales	Saccharomycetaceae	[Candida]
17	B107	MT988196	KP131705.1	CTCCCTAGATCAACACCGAGTTGGTAAAACCTAATACAGTATTAACCCCCGCCGCTCGCGCAAACGAGCAGCAGATTAATAGAGAAGCTTGCGCTCGTGTCCCACATACTGATATGGCCTACAATTTCAAGTTAACTCAAAAACGAGAGTATCACTCACTACCAAACACAATGTGTTTGAGAAGGAAATGACGCTCAAACAGGCATGCCCCCCGGAATACCAGAGGGCGCAATGTGCGTTCAAAGATTCGATGATTCACGGAATTCTGCAATTCACATTACGTATCGCATTTCGCTGCGTTCTTCATCGATGCGAGAACCAAGAGATCCATTRTTGAAAGTTTTGAAGTTGTTTTCTACTAAAAGAAATCTTGTGTTGACTGAATTAGTTTAAAAAAAT…	[Candida] glabrata		KP131705.1 Candida glabrata strain CNRMA7.834 isolate ISHAM-ITS_ID MITS652 18S ribosomal RNA gene, partial sequence; internal transcribed spacer 1, 5.8S ribosomal RNA gene, and internal transcribed spacer 2, complete sequence; and 28S ribosomal RNA gene, partial sequence	99.212	761	0	755	6	0	0	CTCCCTAGATCAACACCGAGTTGGTAAAACCTAATACAGTATTAACCCCCGCCGCTCGCGCAAACGAGCAGCAGATTAATAGAGAAGCTTGCGCTCGTGTCCCACATACTGATATGGCCTACAATTTCAAGTTAACTCAAAAACGAGAGTATCACTCACTACCAAACACAATGTGTTTGAGAAGGAAATGACGCTCAAACAGGCATGCCCCCCGGAATACCAGAGGGCGCAATGTGCGTTCAAAGATTCGATGATTCACGGAATTCTGCAATTCACATTACGTATCGCATTTCGCTGCGTTCTTCATCGATGCGAGAACCAAGAGATCCATTRTTGAAAGTTTTGAAGTTGTTTTCTACTAAAAGAAATCTTGTGTTGACTGAATTAGTTTAAAAAAAT…	CTCCCTAGATCAACACCGAGTTGGTAAAACCTAATACAGTATTAACCCCCGCCGCTCGCGCAAACGAGCAGCAGATTAATAGAGAAGCTTGCGCTCGTGTCCCACATACTGATATGGCCTACAATTTCAAGTTAACTCAAAAACGAGAGTATCACTCACTACCAAACACAATGTGTTTGAGAAGGAAATGACGCTCAAACAGGCATGCCCCCCGGAATACCAGAGGGCGCAATGTGCGTTCAAAGATTCGATGATTCACGGAATTCTGCAATTCACATTACGTATCGCATTTCGCTGCGTTCTTCATCGATGCGAGAACCAAGAGATCCATTGTTGAAAGTTTTGAAGTTGTTTTCTACTAAAAGAAATCTTGTGTTGACTGAATTAGTTTAAAAAAAT…	Ascomycota	Saccharomycetales	Saccharomycetaceae	[Candida]
18	B117	MT988197	MH918800.1	TCCCTAGATCAACACCGAGTTGGTAAAACCTAATACAGTATTAACCCCCGCCGCTCGCGCAAACGAGCAGCAGATTAATAGAGAAGCTTGCGCTCGTGTCCCACATACTGATATGGCCTACAATTTCAAGTTAACTCAAAAACGAGAGTATCACTCACTACCAAACACAAYGTGTTTGAGAAGGAAATGACGCTCAAACAGGCATGCCCCCCGGAATACCAGAGGGCGCAATGTGCGTTCAAAGATTCGATGATTCACGGAATTCTGCAATTCACATTACGTATCGCATTTCGCTGCGTTCTTCATCGATGCGAGAACCAAGAGATCCATTRTTGAAAGTTTTGAAGTTGTTTTCTACTAAAAGAAATCTTGTGTTGACTGAATTAGTTTAAAAAAATA…	[Candida] glabrata		MH918800.1 [Candida] glabrata voucher CG-3PI internal transcribed spacer 1, partial sequence; 5.8S ribosomal RNA gene, complete sequence; and internal transcribed spacer 2, partial sequence	99.538	433	0	431	2	0	0	TCCCTAGATCAACACCGAGTTGGTAAAACCTAATACAGTATTAACCCCCGCCGCTCGCGCAAACGAGCAGCAGATTAATAGAGAAGCTTGCGCTCGTGTCCCACATACTGATATGGCCTACAATTTCAAGTTAACTCAAAAACGAGAGTATCACTCACTACCAAACACAAYGTGTTTGAGAAGGAAATGACGCTCAAACAGGCATGCCCCCCGGAATACCAGAGGGCGCAATGTGCGTTCAAAGATTCGATGATTCACGGAATTCTGCAATTCACATTACGTATCGCATTTCGCTGCGTTCTTCATCGATGCGAGAACCAAGAGATCCATTRTTGAAAGTTTTGAAGTTGTTTTCTACTAAAAGAAATCTTGTGTTGACTGAATTAGTTTAAAAAAATA…	TCCCTAGATCAACACCGAGTTGGTAAAACCTAATACAGTATTAACCCCCGCCGCTCGCGCAAACGAGCAGCAGATTAATAGAGAAGCTTGCGCTCGTGTCCCACATACTGATATGGCCTACAATTTCAAGTTAACTCAAAAACGAGAGTATCACTCACTACCAAACACAATGTGTTTGAGAAGGAAATGACGCTCAAACAGGCATGCCCCCCGGAATACCAGAGGGCGCAATGTGCGTTCAAAGATTCGATGATTCACGGAATTCTGCAATTCACATTACGTATCGCATTTCGCTGCGTTCTTCATCGATGCGAGAACCAAGAGATCCATTGTTGAAAGTTTTGAAGTTGTTTTCTACTAAAAGAAATCTTGTGTTGACTGAATTAGTTTAAAAAAATA…	Ascomycota	Saccharomycetales	Saccharomycetaceae	[Candida]
19	B118	MT988198	KJ009319.1	TTGAGGTCAACTTAAAGACGTCTGTCTGCCCAGCACGCACARAACACTCACTTATCCCTCCCTAGATCAACACCGAGTTGGTAAAACCTAATACAGTATTAACCCCCGCCGCTCGCGCAAACGAGCAGCAGATTAATAGAGAAGCTTGCGCTCGTGTCCCACATACTGATATGGCCTACAATTTCAAGTTAACTCAAAAACGAGAGTATCACTCACTACCAAACACAAYGTGTTTGAGAAGGAAATGACGCTCAAACAGGCATGCCCCCCGGAATACCAGAGGGCGCAATGTGCGTTCAAAGATTCGATGATTCACGGAATTCTGCAATTCACATTACGTATCGCATTTCGCTGCGTTCTTCATCGATGCGAGAACCAAGAGATCCATTRTTGAAAGTT…	[Candida] glabrata		KJ009319.1 Candida glabrata strain CBS 12440 internal transcribed spacer 1, partial sequence; 5.8S ribosomal RNA gene and internal transcribed spacer 2, complete sequence; and 28S ribosomal RNA gene, partial sequence	99.389	491	0	488	3	0	0	TTGAGGTCAACTTAAAGACGTCTGTCTGCCCAGCACGCACARAACACTCACTTATCCCTCCCTAGATCAACACCGAGTTGGTAAAACCTAATACAGTATTAACCCCCGCCGCTCGCGCAAACGAGCAGCAGATTAATAGAGAAGCTTGCGCTCGTGTCCCACATACTGATATGGCCTACAATTTCAAGTTAACTCAAAAACGAGAGTATCACTCACTACCAAACACAAYGTGTTTGAGAAGGAAATGACGCTCAAACAGGCATGCCCCCCGGAATACCAGAGGGCGCAATGTGCGTTCAAAGATTCGATGATTCACGGAATTCTGCAATTCACATTACGTATCGCATTTCGCTGCGTTCTTCATCGATGCGAGAACCAAGAGATCCATTRTTGAAAGTT…	TTGAGGTCAACTTAAAGACGTCTGTCTGCCCAGCACGCACAAAACACTCACTTATCCCTCCCTAGATCAACACCGAGTTGGTAAAACCTAATACAGTATTAACCCCCGCCGCTCGCGCAAACGAGCAGCAGATTAATAGAGAAGCTTGCGCTCGTGTCCCACATACTGATATGGCCTACAATTTCAAGTTAACTCAAAAACGAGAGTATCACTCACTACCAAACACAACGTGTTTGAGAAGGAAATGACGCTCAAACAGGCATGCCCCCCGGAATACCAGAGGGCGCAATGTGCGTTCAAAGATTCGATGATTCACGGAATTCTGCAATTCACATTACGTATCGCATTTCGCTGCGTTCTTCATCGATGCGAGAACCAAGAGATCCATTGTTGAAAGTT…	Ascomycota	Saccharomycetales	Saccharomycetaceae	[Candida]
20	B124	MT988199	MH918800.1	AACACTCACTTATCCCTCCCTAGATCAACACCGAGTTGGTAAAACCTAATACAGTATTAACCCCCGCCGCTCGCGCAAACGAGCAGCAGATTAATAGAGAAGCTTGCGCTCGTGTCCCACATACTGATATGGCCTACAATTTCAAGTTAACTCAAAAACGAGAGTATCACTCACTACCAAACACAAYGTGTTTGAGAAGGAAATGACGCTCAAACAGGCATGCCCCCCGGAATACCAGAGGGCGCAATGTGCGTTCAAAGATTCGATGATTCACGGAATTCTGCAATTCACATTACGTATCGCATTTCGCTGCGTTCTTCATCGATGCGAGAACCAAGAGATCCATTRTTGAAAGTTTTGAAGTTGTTTTCTACTAAAAGAAATCTTGTGTTGACTGAA…	[Candida] glabrata		MH918800.1 [Candida] glabrata voucher CG-3PI internal transcribed spacer 1, partial sequence; 5.8S ribosomal RNA gene, complete sequence; and internal transcribed spacer 2, partial sequence	99.555	449	0	447	2	0	0	AACACTCACTTATCCCTCCCTAGATCAACACCGAGTTGGTAAAACCTAATACAGTATTAACCCCCGCCGCTCGCGCAAACGAGCAGCAGATTAATAGAGAAGCTTGCGCTCGTGTCCCACATACTGATATGGCCTACAATTTCAAGTTAACTCAAAAACGAGAGTATCACTCACTACCAAACACAAYGTGTTTGAGAAGGAAATGACGCTCAAACAGGCATGCCCCCCGGAATACCAGAGGGCGCAATGTGCGTTCAAAGATTCGATGATTCACGGAATTCTGCAATTCACATTACGTATCGCATTTCGCTGCGTTCTTCATCGATGCGAGAACCAAGAGATCCATTRTTGAAAGTTTTGAAGTTGTTTTCTACTAAAAGAAATCTTGTGTTGACTGAA…	AACACTCACTTATCCCTCCCTAGATCAACACCGAGTTGGTAAAACCTAATACAGTATTAACCCCCGCCGCTCGCGCAAACGAGCAGCAGATTAATAGAGAAGCTTGCGCTCGTGTCCCACATACTGATATGGCCTACAATTTCAAGTTAACTCAAAAACGAGAGTATCACTCACTACCAAACACAATGTGTTTGAGAAGGAAATGACGCTCAAACAGGCATGCCCCCCGGAATACCAGAGGGCGCAATGTGCGTTCAAAGATTCGATGATTCACGGAATTCTGCAATTCACATTACGTATCGCATTTCGCTGCGTTCTTCATCGATGCGAGAACCAAGAGATCCATTGTTGAAAGTTTTGAAGTTGTTTTCTACTAAAAGAAATCTTGTGTTGACTGAA…	Ascomycota	Saccharomycetales	Saccharomycetaceae	[Candida]
21	B128	MT988200	MH918800.1	CTCCCTAGATCAACACCGAGTTGGTAAAACCTAATACAGTATTAACCCCCGCCGCTCGCGCAAACGAGCAGCAGATTAATAGAGAAGCTTGCGCTCGTGTCCCACATACTGATATGGCCTACAATTTCAAGTTAACTCAAAAACGAGAGTATCACTCACTACCAAACACAAYGTGTTTGAGAAGGAAATGACGCTCAAACAGGCATGCCCCCCGGAATACCAGAGGGCGCAATGTGCGTTCAAAGATTCGATGATTCACGGAATTCTGCAATTCACATTACGTATCGCATTTCGCTGCGTTCTTCATCGATGCGAGAACCAAGAGATCCATTRTTGAAAGTTTTGAAGTTGTTTTCTACTAAAAGAAATCTTGTGTTGACTGAATTAGTTTAAAAAAAT…	[Candida] glabrata		MH918800.1 [Candida] glabrata voucher CG-3PI internal transcribed spacer 1, partial sequence; 5.8S ribosomal RNA gene, complete sequence; and internal transcribed spacer 2, partial sequence	99.539	434	0	432	2	0	0	CTCCCTAGATCAACACCGAGTTGGTAAAACCTAATACAGTATTAACCCCCGCCGCTCGCGCAAACGAGCAGCAGATTAATAGAGAAGCTTGCGCTCGTGTCCCACATACTGATATGGCCTACAATTTCAAGTTAACTCAAAAACGAGAGTATCACTCACTACCAAACACAAYGTGTTTGAGAAGGAAATGACGCTCAAACAGGCATGCCCCCCGGAATACCAGAGGGCGCAATGTGCGTTCAAAGATTCGATGATTCACGGAATTCTGCAATTCACATTACGTATCGCATTTCGCTGCGTTCTTCATCGATGCGAGAACCAAGAGATCCATTRTTGAAAGTTTTGAAGTTGTTTTCTACTAAAAGAAATCTTGTGTTGACTGAATTAGTTTAAAAAAAT…	CTCCCTAGATCAACACCGAGTTGGTAAAACCTAATACAGTATTAACCCCCGCCGCTCGCGCAAACGAGCAGCAGATTAATAGAGAAGCTTGCGCTCGTGTCCCACATACTGATATGGCCTACAATTTCAAGTTAACTCAAAAACGAGAGTATCACTCACTACCAAACACAATGTGTTTGAGAAGGAAATGACGCTCAAACAGGCATGCCCCCCGGAATACCAGAGGGCGCAATGTGCGTTCAAAGATTCGATGATTCACGGAATTCTGCAATTCACATTACGTATCGCATTTCGCTGCGTTCTTCATCGATGCGAGAACCAAGAGATCCATTGTTGAAAGTTTTGAAGTTGTTTTCTACTAAAAGAAATCTTGTGTTGACTGAATTAGTTTAAAAAAAT…	Ascomycota	Saccharomycetales	Saccharomycetaceae	[Candida]
22	B131	MT988201	MH918800.1	TTACGTATCGCATTTCGCTGCGTTCTTCATCGATGCGAGAACCAAGAGATCCATTRTTGAAAGTTTTGAAGTTGTTTTCTACTAAAAGAAATCTTGTGTTGACTGAATTAGTTTAAAAAAATATTTGTTTGTGTTTGCATCCACTGGGAGAACTCCC	[Candida] glabrata		MH918800.1 [Candida] glabrata voucher CG-3PI internal transcribed spacer 1, partial sequence; 5.8S ribosomal RNA gene, complete sequence; and internal transcribed spacer 2, partial sequence	99.363	157	1.9e-76	156	1	0	0	TTACGTATCGCATTTCGCTGCGTTCTTCATCGATGCGAGAACCAAGAGATCCATTRTTGAAAGTTTTGAAGTTGTTTTCTACTAAAAGAAATCTTGTGTTGACTGAATTAGTTTAAAAAAATATTTGTTTGTGTTTGCATCCACTGGGAGAACTCCC	TTACGTATCGCATTTCGCTGCGTTCTTCATCGATGCGAGAACCAAGAGATCCATTGTTGAAAGTTTTGAAGTTGTTTTCTACTAAAAGAAATCTTGTGTTGACTGAATTAGTTTAAAAAAATATTTGTTTGTGTTTGCATCCACTGGGAGAACTCCC	Ascomycota	Saccharomycetales	Saccharomycetaceae	[Candida]
23	B132	MT988202	KJ009319.1	CAACTTAAAGACGTCTGTCTGCCCAGCACGCACARAACACTCACTTATCYCTCCCTAGATCAACACCGAGTTGGTAAAACCTAATACAGTATTAACCCCCGCCGCTCGCGCAAACGAGCAGCAGATTAATAGAGAAGCTTGCGCTCGTGTCCCACATACTGATATGGCCTACAATTTCAAGTTAACTCAAAAACGAGAGTATCACTCACTACCAAACACAAYGTGTTTGAGAAGGAAATGACGCTCAAACAGGCATGCCCCCCGGAATACCAGAGGGCGCAATGTGCGTTCAAAGATTCGATGATTCACGGAATTCTGCAATTCACATTACGTATCGCATTTCGCTGCGTTCTTCATCGATGCGAGAACCAAGAGATCCATTRTTGAAAGTTTTGAAGT…	[Candida] glabrata		KJ009319.1 Candida glabrata strain CBS 12440 internal transcribed spacer 1, partial sequence; 5.8S ribosomal RNA gene and internal transcribed spacer 2, complete sequence; and 28S ribosomal RNA gene, partial sequence	99.174	484	0	480	4	0	0	CAACTTAAAGACGTCTGTCTGCCCAGCACGCACARAACACTCACTTATCYCTCCCTAGATCAACACCGAGTTGGTAAAACCTAATACAGTATTAACCCCCGCCGCTCGCGCAAACGAGCAGCAGATTAATAGAGAAGCTTGCGCTCGTGTCCCACATACTGATATGGCCTACAATTTCAAGTTAACTCAAAAACGAGAGTATCACTCACTACCAAACACAAYGTGTTTGAGAAGGAAATGACGCTCAAACAGGCATGCCCCCCGGAATACCAGAGGGCGCAATGTGCGTTCAAAGATTCGATGATTCACGGAATTCTGCAATTCACATTACGTATCGCATTTCGCTGCGTTCTTCATCGATGCGAGAACCAAGAGATCCATTRTTGAAAGTTTTGAAGT…	CAACTTAAAGACGTCTGTCTGCCCAGCACGCACAAAACACTCACTTATCCCTCCCTAGATCAACACCGAGTTGGTAAAACCTAATACAGTATTAACCCCCGCCGCTCGCGCAAACGAGCAGCAGATTAATAGAGAAGCTTGCGCTCGTGTCCCACATACTGATATGGCCTACAATTTCAAGTTAACTCAAAAACGAGAGTATCACTCACTACCAAACACAACGTGTTTGAGAAGGAAATGACGCTCAAACAGGCATGCCCCCCGGAATACCAGAGGGCGCAATGTGCGTTCAAAGATTCGATGATTCACGGAATTCTGCAATTCACATTACGTATCGCATTTCGCTGCGTTCTTCATCGATGCGAGAACCAAGAGATCCATTGTTGAAAGTTTTGAAGT…	Ascomycota	Saccharomycetales	Saccharomycetaceae	[Candida]
24	B133	MT988203	MH918800.1	TCCCTAGATCAACACCGAGTTGGTAAAACCTAATACAGTATTAACCCCCGCCGCTCGCGCAAACGAGCAGCAGATTAATAGAGAAGCTTGCGCTCGTGTCCCACATACTGATATGGCCTACAATTTCAAGTTAACTCAAAAACGAGAGTATCACTCACTACCAAACACAAYGTGTTTGAGAAGGAAATGACGCTCAAACAGGCATGCCCCCCGGAATACCAGAGGGCGCAATGTGCGTTCAAAGATTCGATGATTCACGGAATTCTGCAATTCACATTACGTATCGCATTTCGCTGCGTTCTTCATCGATGCGAGAACCAAGAGATCCATTRTTGAAAGTTTTGAAGTTGTTTTCTACTAAAAGAAATCTTGTGTTGACTGAATTAGTTTAAAAAAATA…	[Candida] glabrata		MH918800.1 [Candida] glabrata voucher CG-3PI internal transcribed spacer 1, partial sequence; 5.8S ribosomal RNA gene, complete sequence; and internal transcribed spacer 2, partial sequence	99.538	433	0	431	2	0	0	TCCCTAGATCAACACCGAGTTGGTAAAACCTAATACAGTATTAACCCCCGCCGCTCGCGCAAACGAGCAGCAGATTAATAGAGAAGCTTGCGCTCGTGTCCCACATACTGATATGGCCTACAATTTCAAGTTAACTCAAAAACGAGAGTATCACTCACTACCAAACACAAYGTGTTTGAGAAGGAAATGACGCTCAAACAGGCATGCCCCCCGGAATACCAGAGGGCGCAATGTGCGTTCAAAGATTCGATGATTCACGGAATTCTGCAATTCACATTACGTATCGCATTTCGCTGCGTTCTTCATCGATGCGAGAACCAAGAGATCCATTRTTGAAAGTTTTGAAGTTGTTTTCTACTAAAAGAAATCTTGTGTTGACTGAATTAGTTTAAAAAAATA…	TCCCTAGATCAACACCGAGTTGGTAAAACCTAATACAGTATTAACCCCCGCCGCTCGCGCAAACGAGCAGCAGATTAATAGAGAAGCTTGCGCTCGTGTCCCACATACTGATATGGCCTACAATTTCAAGTTAACTCAAAAACGAGAGTATCACTCACTACCAAACACAATGTGTTTGAGAAGGAAATGACGCTCAAACAGGCATGCCCCCCGGAATACCAGAGGGCGCAATGTGCGTTCAAAGATTCGATGATTCACGGAATTCTGCAATTCACATTACGTATCGCATTTCGCTGCGTTCTTCATCGATGCGAGAACCAAGAGATCCATTGTTGAAAGTTTTGAAGTTGTTTTCTACTAAAAGAAATCTTGTGTTGACTGAATTAGTTTAAAAAAATA…	Ascomycota	Saccharomycetales	Saccharomycetaceae	[Candida]
25	B163	MT988204	MH918800.1	CCTAGATCAACACCGAGTTGGTAAAACCTAATACAGTATTAACCCCCGCCGCTCGCGCAAACGAGCAGCAGATTAATAGAGAAGCTTGCGCTCGTGTCCCACATACTGATATGGCCTACAATTTCAAGTTAACTCAAAAACGAGAGTATCACTCACTACCAAACACAAYGTGTTTGAGAAGGAAATGACGCTCAAACAGGCATGCCCCCCGGAATACCAGAGGGCGCAATGTGCGTTCAAAGATTCGATGATTCACGGAATTCTGCAATTCACATTACGTATCGCATTTCGCTGCGTTCTTCATCGATGCGAGAACCAAGAGATCCATTRTTGAAAGTTTTGAAGTTGTTTTCTACTAAAAGAAATCTTGTGTTGACTGAATTAGTTTAAAAAAATATT…	[Candida] glabrata		MH918800.1 [Candida] glabrata voucher CG-3PI internal transcribed spacer 1, partial sequence; 5.8S ribosomal RNA gene, complete sequence; and internal transcribed spacer 2, partial sequence	99.536	431	0	429	2	0	0	CCTAGATCAACACCGAGTTGGTAAAACCTAATACAGTATTAACCCCCGCCGCTCGCGCAAACGAGCAGCAGATTAATAGAGAAGCTTGCGCTCGTGTCCCACATACTGATATGGCCTACAATTTCAAGTTAACTCAAAAACGAGAGTATCACTCACTACCAAACACAAYGTGTTTGAGAAGGAAATGACGCTCAAACAGGCATGCCCCCCGGAATACCAGAGGGCGCAATGTGCGTTCAAAGATTCGATGATTCACGGAATTCTGCAATTCACATTACGTATCGCATTTCGCTGCGTTCTTCATCGATGCGAGAACCAAGAGATCCATTRTTGAAAGTTTTGAAGTTGTTTTCTACTAAAAGAAATCTTGTGTTGACTGAATTAGTTTAAAAAAATATT…	CCTAGATCAACACCGAGTTGGTAAAACCTAATACAGTATTAACCCCCGCCGCTCGCGCAAACGAGCAGCAGATTAATAGAGAAGCTTGCGCTCGTGTCCCACATACTGATATGGCCTACAATTTCAAGTTAACTCAAAAACGAGAGTATCACTCACTACCAAACACAATGTGTTTGAGAAGGAAATGACGCTCAAACAGGCATGCCCCCCGGAATACCAGAGGGCGCAATGTGCGTTCAAAGATTCGATGATTCACGGAATTCTGCAATTCACATTACGTATCGCATTTCGCTGCGTTCTTCATCGATGCGAGAACCAAGAGATCCATTGTTGAAAGTTTTGAAGTTGTTTTCTACTAAAAGAAATCTTGTGTTGACTGAATTAGTTTAAAAAAATATT…	Ascomycota	Saccharomycetales	Saccharomycetaceae	[Candida]
26	B168	MT988205	MH918800.1	CTCCCTAGATCAACACCGAGTTGGTAAAACCTAATACAGTATTAACCCCCGCCGCTCGCGCAAACGAGCAGCAGATTAATAGAGAAGCTTGCGCTCGTGTCCCACATACTGATATGGCCTACAATTTCAAGTTAACTCAAAAACGAGAGTATCACTCACTACCAAACACAAYGTGTTTGAGAAGGAAATGACGCTCAAACAGGCATGCCCCCCGGAATACCAGAGGGCGCAATGTGCGTTCAAAGATTCGATGATTCACGGAATTCTGCAATTCACATTACGTATCGCATTTCGCTGCGTTCTTCATCGATGCGAGAACCAAGAGATCCATTRTTGAAAGTTTTGAAGTTGTTTTCTACTAAAAGAAATCTTGTGTTGACTGAATTAGTTTAAAAAAAT…	[Candida] glabrata		MH918800.1 [Candida] glabrata voucher CG-3PI internal transcribed spacer 1, partial sequence; 5.8S ribosomal RNA gene, complete sequence; and internal transcribed spacer 2, partial sequence	99.315	438	0	435	3	0	0	CTCCCTAGATCAACACCGAGTTGGTAAAACCTAATACAGTATTAACCCCCGCCGCTCGCGCAAACGAGCAGCAGATTAATAGAGAAGCTTGCGCTCGTGTCCCACATACTGATATGGCCTACAATTTCAAGTTAACTCAAAAACGAGAGTATCACTCACTACCAAACACAAYGTGTTTGAGAAGGAAATGACGCTCAAACAGGCATGCCCCCCGGAATACCAGAGGGCGCAATGTGCGTTCAAAGATTCGATGATTCACGGAATTCTGCAATTCACATTACGTATCGCATTTCGCTGCGTTCTTCATCGATGCGAGAACCAAGAGATCCATTRTTGAAAGTTTTGAAGTTGTTTTCTACTAAAAGAAATCTTGTGTTGACTGAATTAGTTTAAAAAAAT…	CTCCCTAGATCAACACCGAGTTGGTAAAACCTAATACAGTATTAACCCCCGCCGCTCGCGCAAACGAGCAGCAGATTAATAGAGAAGCTTGCGCTCGTGTCCCACATACTGATATGGCCTACAATTTCAAGTTAACTCAAAAACGAGAGTATCACTCACTACCAAACACAATGTGTTTGAGAAGGAAATGACGCTCAAACAGGCATGCCCCCCGGAATACCAGAGGGCGCAATGTGCGTTCAAAGATTCGATGATTCACGGAATTCTGCAATTCACATTACGTATCGCATTTCGCTGCGTTCTTCATCGATGCGAGAACCAAGAGATCCATTGTTGAAAGTTTTGAAGTTGTTTTCTACTAAAAGAAATCTTGTGTTGACTGAATTAGTTTAAAAAAAT…	Ascomycota	Saccharomycetales	Saccharomycetaceae	[Candida]
27	B173	MT988206	KJ009319.1	TTGAGGTCAACTTAAAGACGTCTGTCTGCCCAGCACGCACARAACACTCACTTATCCCTCCCTAGATCAACACCGAGTTGGTAAAACCTAATACAGTATTAACCCCCGCCGCTCGCGCAAACGAGCAGCAGATTAATAGAGAAGCTTGCGCTCGTGTCCCACATACTGATATGGCCTACAATTTCAAGTTAACTCAAAAACGAGAGTATCACTCACTACCAAACACAAYGTGTTTGAGAAGGAAATGACGCTCAAACAGGCATGCCCCCCGGAATACCAGAGGGCGCAATGTGCGTTCAAAGATTCGATGATTCACGGAATTCTGCAATTCACATTACGTATCGCATTTCGCTGCGTTCTTCATCGATGCGAGAACCAAGAGATCCATTRTTGAAAGTT…	[Candida] glabrata		KJ009319.1 Candida glabrata strain CBS 12440 internal transcribed spacer 1, partial sequence; 5.8S ribosomal RNA gene and internal transcribed spacer 2, complete sequence; and 28S ribosomal RNA gene, partial sequence	99.389	491	0	488	3	0	0	TTGAGGTCAACTTAAAGACGTCTGTCTGCCCAGCACGCACARAACACTCACTTATCCCTCCCTAGATCAACACCGAGTTGGTAAAACCTAATACAGTATTAACCCCCGCCGCTCGCGCAAACGAGCAGCAGATTAATAGAGAAGCTTGCGCTCGTGTCCCACATACTGATATGGCCTACAATTTCAAGTTAACTCAAAAACGAGAGTATCACTCACTACCAAACACAAYGTGTTTGAGAAGGAAATGACGCTCAAACAGGCATGCCCCCCGGAATACCAGAGGGCGCAATGTGCGTTCAAAGATTCGATGATTCACGGAATTCTGCAATTCACATTACGTATCGCATTTCGCTGCGTTCTTCATCGATGCGAGAACCAAGAGATCCATTRTTGAAAGTT…	TTGAGGTCAACTTAAAGACGTCTGTCTGCCCAGCACGCACAAAACACTCACTTATCCCTCCCTAGATCAACACCGAGTTGGTAAAACCTAATACAGTATTAACCCCCGCCGCTCGCGCAAACGAGCAGCAGATTAATAGAGAAGCTTGCGCTCGTGTCCCACATACTGATATGGCCTACAATTTCAAGTTAACTCAAAAACGAGAGTATCACTCACTACCAAACACAACGTGTTTGAGAAGGAAATGACGCTCAAACAGGCATGCCCCCCGGAATACCAGAGGGCGCAATGTGCGTTCAAAGATTCGATGATTCACGGAATTCTGCAATTCACATTACGTATCGCATTTCGCTGCGTTCTTCATCGATGCGAGAACCAAGAGATCCATTGTTGAAAGTT…	Ascomycota	Saccharomycetales	Saccharomycetaceae	[Candida]
28	B169	MT988163	MT321273.1	AGGTCAACTTGTTTGTTATATTGTAAGGCCGAGCCTAGAATACCGAGAAATATWCCATTAAACTATTCAACGAGTTGGATAAACCTAATACATTGAAAGTCATATAGCACTATCCAGTACCACTCATGCCAATACATTTCAAGCAAACGCCTAGTTCAACTAAGAGTATCACTCAATACCAAACCCGAAGGTTTGAGAGAGAAATGACGCTCAAACAGGCATGCCCTCTGGAATACCAGAGGGCGCAATGTGCGTTCAAAGATTCGATGATTCACGAAAATCTGCAATTCATATTACTTATCGCATTTCGCTGCGTTCTTCATCGATGCGAGAACCAAGAGATCCGTTGTTGAAAGTTTTGAAGATTTTTTGAATTTAATCAACAAATTGACAATTAAA…	Debaryomyces aff. hansenii		MT321273.1 Debaryomyces hansenii strain TTG-183-2 small subunit ribosomal RNA gene, partial sequence; internal transcribed spacer 1 and 5.8S ribosomal RNA gene, complete sequence; and internal transcribed spacer 2, partial sequence	99.66	589	0	587	2	0	0	AGGTCAACTTGTTTGTTATATTGTAAGGCCGAGCCTAGAATACCGAGAAATATWCCATTAAACTATTCAACGAGTTGGATAAACCTAATACATTGAAAGTCATATAGCACTATCCAGTACCACTCATGCCAATACATTTCAAGCAAACGCCTAGTTCAACTAAGAGTATCACTCAATACCAAACCCGAAGGTTTGAGAGAGAAATGACGCTCAAACAGGCATGCCCTCTGGAATACCAGAGGGCGCAATGTGCGTTCAAAGATTCGATGATTCACGAAAATCTGCAATTCATATTACTTATCGCATTTCGCTGCGTTCTTCATCGATGCGAGAACCAAGAGATCCGTTGTTGAAAGTTTTGAAGATTTTTTGAATTTAATCAACAAATTGACAATTAAA…	AGGTCAACTTGTTTGTTATATTGTAAGGCCGAGCCTAGAATACCGAGAAATATACCATTAAACTATTCAACGAGTTGGATAAACCTAATACATTGAAAGTCATATAGCACTATCCAGTACCACTCATGCCAATACATTTCAAGCAAACGCCTAGTTCGACTAAGAGTATCACTCAATACCAAACCCGAAGGTTTGAGAGAGAAATGACGCTCAAACAGGCATGCCCTCTGGAATACCAGAGGGCGCAATGTGCGTTCAAAGATTCGATGATTCACGAAAATCTGCAATTCATATTACTTATCGCATTTCGCTGCGTTCTTCATCGATGCGAGAACCAAGAGATCCGTTGTTGAAAGTTTTGAAGATTTTTTGAATTTAATCAACAAATTGACAATTAAA…	Ascomycota	Saccharomycetales	Debaryomycetaceae	Debaryomyces
29	B086	MT988164	KU216711.1	ATTTGAGGTCAACTTGTTTGGTTGTTGTAAGGCCGGGCCAACAATACCAGAAATATCCCGCCACACCATTCAACGAGTTGGATAAACCTAATACATTGAGAGGTCGACAGCACTATCTAGTACTACCCATGCCAATACTTTTCAAGCAAACGCCTAGTCCGACTAAGAGTATCACTCAATACCAAACCCGGGGGTTTGAGAGAGAAATGACGCTCAAACAGGCATGCCCTCTGGAATACCAGAGGGCGCAATGTGCGTTCAAAGATTCGATGATTCACGAAAATCTGCAATTCATATTACTTATCGCATTTCGCTGCGTTCTTCATCGATGCGAGAACCAAGAGATCCGTTGTTGAAAGTTTTGAAGATTAATTCAAAATTTGACTAACTGTAAAAATA…	Meyerozyma aff. guilliermondii		KU216711.1 Meyerozyma guilliermondii strain XQ9 18S ribosomal RNA gene, partial sequence; internal transcribed spacer 1, 5.8S ribosomal RNA gene, and internal transcribed spacer 2, complete sequence; and 28S ribosomal RNA gene, partial sequence	100	562	0	562	0	0	0	ATTTGAGGTCAACTTGTTTGGTTGTTGTAAGGCCGGGCCAACAATACCAGAAATATCCCGCCACACCATTCAACGAGTTGGATAAACCTAATACATTGAGAGGTCGACAGCACTATCTAGTACTACCCATGCCAATACTTTTCAAGCAAACGCCTAGTCCGACTAAGAGTATCACTCAATACCAAACCCGGGGGTTTGAGAGAGAAATGACGCTCAAACAGGCATGCCCTCTGGAATACCAGAGGGCGCAATGTGCGTTCAAAGATTCGATGATTCACGAAAATCTGCAATTCATATTACTTATCGCATTTCGCTGCGTTCTTCATCGATGCGAGAACCAAGAGATCCGTTGTTGAAAGTTTTGAAGATTAATTCAAAATTTGACTAACTGTAAAAATA…	ATTTGAGGTCAACTTGTTTGGTTGTTGTAAGGCCGGGCCAACAATACCAGAAATATCCCGCCACACCATTCAACGAGTTGGATAAACCTAATACATTGAGAGGTCGACAGCACTATCTAGTACTACCCATGCCAATACTTTTCAAGCAAACGCCTAGTCCGACTAAGAGTATCACTCAATACCAAACCCGGGGGTTTGAGAGAGAAATGACGCTCAAACAGGCATGCCCTCTGGAATACCAGAGGGCGCAATGTGCGTTCAAAGATTCGATGATTCACGAAAATCTGCAATTCATATTACTTATCGCATTTCGCTGCGTTCTTCATCGATGCGAGAACCAAGAGATCCGTTGTTGAAAGTTTTGAAGATTAATTCAAAATTTGACTAACTGTAAAAATA…	Ascomycota	Saccharomycetales	Debaryomycetaceae	Meyerozyma
30	B143		KF746422.1	GTCAACTTGTTTGGTTGTTGTAAGGCCGGGCCAACAATACCAGAAATATCCCGCCACACCATTCAACGAGTTGGATAAACCTAATACATTGAGAGGTCGACAGCACTATCCAGTACTACCCATGCCAATACTTTTCAAGCAAACGCCTAGTCCGACTAAGAGTATCACTCAATACCAAACCCGGGGGTTTGAGAGAGAAATGACGCTCAAACAGGCATGCCCTCTGGAATACCAGAGGGCGCAATGTGCGTTCAAAGATTCGATGATTCACGAAAATCTGCAATTCATATTACTTATCGCATTTCGCTGCGTTCTTCATCGATGCGAGAACCAAGAGATCCGTTGTTGAAAGTTTTGAAGATTAATTCAAAATTTGACTAACTGTAAAAATAATTAAAT…	Meyerozyma aff. guilliermondii	WGS sequencing data this publication	KF746422.1 Meyerozyma guilliermondii strain LMICRO532 18S ribosomal RNA gene, partial sequence; internal transcribed spacer 1 and 5.8S ribosomal RNA gene, complete sequence; and internal transcribed spacer 2, partial sequence	100	583	0	583	0	0	0	GTCAACTTGTTTGGTTGTTGTAAGGCCGGGCCAACAATACCAGAAATATCCCGCCACACCATTCAACGAGTTGGATAAACCTAATACATTGAGAGGTCGACAGCACTATCCAGTACTACCCATGCCAATACTTTTCAAGCAAACGCCTAGTCCGACTAAGAGTATCACTCAATACCAAACCCGGGGGTTTGAGAGAGAAATGACGCTCAAACAGGCATGCCCTCTGGAATACCAGAGGGCGCAATGTGCGTTCAAAGATTCGATGATTCACGAAAATCTGCAATTCATATTACTTATCGCATTTCGCTGCGTTCTTCATCGATGCGAGAACCAAGAGATCCGTTGTTGAAAGTTTTGAAGATTAATTCAAAATTTGACTAACTGTAAAAATAATTAAAT…	GTCAACTTGTTTGGTTGTTGTAAGGCCGGGCCAACAATACCAGAAATATCCCGCCACACCATTCAACGAGTTGGATAAACCTAATACATTGAGAGGTCGACAGCACTATCCAGTACTACCCATGCCAATACTTTTCAAGCAAACGCCTAGTCCGACTAAGAGTATCACTCAATACCAAACCCGGGGGTTTGAGAGAGAAATGACGCTCAAACAGGCATGCCCTCTGGAATACCAGAGGGCGCAATGTGCGTTCAAAGATTCGATGATTCACGAAAATCTGCAATTCATATTACTTATCGCATTTCGCTGCGTTCTTCATCGATGCGAGAACCAAGAGATCCGTTGTTGAAAGTTTTGAAGATTAATTCAAAATTTGACTAACTGTAAAAATAATTAAAT…	Ascomycota	Saccharomycetales	Debaryomycetaceae	Meyerozyma
31	B162	MT988165	KF710038.1	TTGAGGTCAACTTGTTTGGTTGTTGTAAGGCCGGGCCAACAATACCAGAAATATCCCGCCACACCATTCAACGAGTTGGATAAACCTAATACATTGAGAGGTCGACAGCACTATCCAGTACTACCCATGCCAATACTTTTCAAGCAAACGCCTAGTCCGACTAAGAGTATCACTCAATACCAAACCCGGGGGTTTGAGAGAGAAATGACGCTCAAACAGGCATGCCCTCTGGAATACCAGAGGGCGCAATGTGCGTTCAAAGATTCGATGATTCACGAAAATCTGCAATTCATATTACTTATCGCATTTCGCTGCGTTCTTCATCGATGCGAGAACCAAGAGATCCGTTGTTGAAAGTTTTGAAGATTAATTCAAAATTTGACTAACTGTAAAAATAAT…	Meyerozyma aff. guilliermondii		KF710038.1 Meyerozyma guilliermondii isolate KDLYH4-4 18S ribosomal RNA gene, partial sequence; internal transcribed spacer 1, 5.8S ribosomal RNA gene, and internal transcribed spacer 2, complete sequence; and 28S ribosomal RNA gene, partial sequence	99.645	563	0	561	0	2	2	TTGAGGTC-AACTTGTTTGGTTGTTGTAAGGCCGGGCCAACAATACCAGAAATATCCCGCCACACCATTCAACGAGTTGGATAAACCTAATACATTGAGAGGTCGACAGCACTATCCAGTACTACCCATGCCAATACTTTTCAAGCAAACGCCTAGTCCGACTAAGAGTATCACTCAATACCAAACCCGGGGGTTTGAGAGAGAAATGACGCTCAAACAGGCATGCCCTCTGGAATACCAGAGGGCGCAATGTGCGTTCAAAGATTCGATGATTCACGAAAATCTGCAATTCATATTACTTATCGCATTTCGCTGCGTTCTTCATCGATGCGAGAACCAAGAGATCCGTTGTTGAAAGTTTTGAAGATTAATTCAAAATTTGACTAACTGTAAAAATAA…	TTGAGGTCAAACTTGTTTGGTTGTTGTAAGGCCGGGCCAACAATACCAGAAATATCCCGCCACACCATTCAACGAGTTGGATAAACCTAATACATTGAGAGGTCGACAGCACTATCCAGTACTACCCATGCCAATACTTTTCAAGCAAACGCCTAGTCCGACTAAGAGTATCACTCAATACCAAACCCGGGGGTTTGAGAGAGAAATGACGCTCAAACAGGCATGCCCTCTGGAATACCAGAGGGCGCAATGTGCGTTCAAAGATTCGATGATTCACGAAAATCTGCAATTCATATTACTTATCGCATTTCGCTGCGTTCTTCATCGATGCGAGAACCAAGAGATCCGTTGTTGAAAGTTTTGAAGATTAATTCAAAATTTGACTAACTGTAAAAATAA…	Ascomycota	Saccharomycetales	Debaryomycetaceae	Meyerozyma
32	B175	MT988166	MF940125.1	CGGGCCAACAATACCAGAAATATCCCGCCACACCATTCAACGAGTTGGATAAACCTAATACATTGAGAGGTCGACAGCACTATCCAGTACTACCCATGCCAATACTTTTCAAGCAAACGCCTAGTCCGACTAAGAGTATCACTCAATACCAAACCCGGGGGTTTGAGAGAGAAATGACGCTCAAACAGGCATGCCCTCTGGAATACCAGAGGGCGCAATGTGCGTTCAAAGATTCGATGATTCACGAAAATCTGCAATTCATATTACTTATCGCATTTCGCTGCGTTCTTCATCGATGCGAGAACCAAGAGATCCGTTGTTGAAAGTTTTGAAGATTAATTCAAAATTTGACTAACTGTAAAAATAATTAAATTGTGTTTTGTTAAACCTCTGGCCCAA…	Meyerozyma aff. guilliermondii		MF940125.1 Meyerozyma guilliermondii strain AD_L15 small subunit ribosomal RNA gene, partial sequence; internal transcribed spacer 1, 5.8S ribosomal RNA gene, and internal transcribed spacer 2, complete sequence; and large subunit ribosomal RNA gene, partial sequence	100	514	0	514	0	0	0	CGGGCCAACAATACCAGAAATATCCCGCCACACCATTCAACGAGTTGGATAAACCTAATACATTGAGAGGTCGACAGCACTATCCAGTACTACCCATGCCAATACTTTTCAAGCAAACGCCTAGTCCGACTAAGAGTATCACTCAATACCAAACCCGGGGGTTTGAGAGAGAAATGACGCTCAAACAGGCATGCCCTCTGGAATACCAGAGGGCGCAATGTGCGTTCAAAGATTCGATGATTCACGAAAATCTGCAATTCATATTACTTATCGCATTTCGCTGCGTTCTTCATCGATGCGAGAACCAAGAGATCCGTTGTTGAAAGTTTTGAAGATTAATTCAAAATTTGACTAACTGTAAAAATAATTAAATTGTGTTTTGTTAAACCTCTGGCCCAA…	CGGGCCAACAATACCAGAAATATCCCGCCACACCATTCAACGAGTTGGATAAACCTAATACATTGAGAGGTCGACAGCACTATCCAGTACTACCCATGCCAATACTTTTCAAGCAAACGCCTAGTCCGACTAAGAGTATCACTCAATACCAAACCCGGGGGTTTGAGAGAGAAATGACGCTCAAACAGGCATGCCCTCTGGAATACCAGAGGGCGCAATGTGCGTTCAAAGATTCGATGATTCACGAAAATCTGCAATTCATATTACTTATCGCATTTCGCTGCGTTCTTCATCGATGCGAGAACCAAGAGATCCGTTGTTGAAAGTTTTGAAGATTAATTCAAAATTTGACTAACTGTAAAAATAATTAAATTGTGTTTTGTTAAACCTCTGGCCCAA…	Ascomycota	Saccharomycetales	Debaryomycetaceae	Meyerozyma
33	B199	MT988167	JF916538.1	TTGAGGTCAACTTGTTTGGTTGTTGTAAGGCCGGGCCAACAATACCAGAAATATCCCGCCACACCATTCAACGAGTTGGATAAACCTAATACATTGAGAGGTCGACAGCACTATCCAGTACTACCCATGCCAATACTTTTCAAGCAAACGCCTAGTCCGACTAAGAGTATCACTCAATACCAAACCCGGGGGTTTGAGAGAGAAATGACGCTCAAACAGGCATGCCCTCTGGAATACCAGAGGGCGCAATGTGCGTTCAAAGATTCGATGATTCACGAAAATCTGCAATTCATATTACTTATCGCATTTCGCTGCGTTCTTCATCGATGCGAGAACCAAGAGATCCGTTGTTGAAAGTTTTGAAGATTAATTCAAAATTTGACTAACTGTAAAAATAAT…	Meyerozyma aff. guilliermondii		JF916538.1 Meyerozyma guilliermondii strain 16A clone d2 internal transcribed spacer 1, partial sequence; 5.8S ribosomal RNA gene, complete sequence; and internal transcribed spacer 2, partial sequence >JF916539.1 Meyerozyma guilliermondii strain 18A internal transcribed spacer 1, partial sequence; 5.8S ribosomal RNA gene, complete sequence; and internal transcribed spacer 2, partial sequence >JF…	100	545	0	545	0	0	0	TTGAGGTCAACTTGTTTGGTTGTTGTAAGGCCGGGCCAACAATACCAGAAATATCCCGCCACACCATTCAACGAGTTGGATAAACCTAATACATTGAGAGGTCGACAGCACTATCCAGTACTACCCATGCCAATACTTTTCAAGCAAACGCCTAGTCCGACTAAGAGTATCACTCAATACCAAACCCGGGGGTTTGAGAGAGAAATGACGCTCAAACAGGCATGCCCTCTGGAATACCAGAGGGCGCAATGTGCGTTCAAAGATTCGATGATTCACGAAAATCTGCAATTCATATTACTTATCGCATTTCGCTGCGTTCTTCATCGATGCGAGAACCAAGAGATCCGTTGTTGAAAGTTTTGAAGATTAATTCAAAATTTGACTAACTGTAAAAATAAT…	TTGAGGTCAACTTGTTTGGTTGTTGTAAGGCCGGGCCAACAATACCAGAAATATCCCGCCACACCATTCAACGAGTTGGATAAACCTAATACATTGAGAGGTCGACAGCACTATCCAGTACTACCCATGCCAATACTTTTCAAGCAAACGCCTAGTCCGACTAAGAGTATCACTCAATACCAAACCCGGGGGTTTGAGAGAGAAATGACGCTCAAACAGGCATGCCCTCTGGAATACCAGAGGGCGCAATGTGCGTTCAAAGATTCGATGATTCACGAAAATCTGCAATTCATATTACTTATCGCATTTCGCTGCGTTCTTCATCGATGCGAGAACCAAGAGATCCGTTGTTGAAAGTTTTGAAGATTAATTCAAAATTTGACTAACTGTAAAAATAAT…	Ascomycota	Saccharomycetales	Debaryomycetaceae	Meyerozyma
34	B105	MT988221	NR_077200.1	TATGGTTGTGAGTAAACTGTAATACTACACCAATCACTTTTTGGAGGAACAGCTGACGCCGTATGTCCATTACCTGCGAGGGAGATAACCGCTCACACACGCATGCCCGCGGGAATACCCACGGGCGCAATGTGCGTTCAAAGATTCGATGATTCACAAAATCTGCAATTCATATTACGTATCGCATTTCGCTGCGTTCTTCATCGATGCGAGAACCAAGAGATCCGTTGTTGGAAGTTTTTGGTATTAGTTGGTTGATTGTTTAATAGGTTATTGAAGTAAGCAATTTTAAATCGCGTGTAAATTAGTTTTTTATGATCCTTCCGCAGGTTCACCTACGGAAACCTTGTTACGACTTTTACTTCCTC	Diutina aff. catenulata		NR_077200.1 Diutina catenulata CBS 565 ITS region; from TYPE material >GU246267.1 Candida catenulata strain CBS 565 18S ribosomal RNA gene, partial sequence; internal transcribed spacer 1, 5.8S ribosomal RNA gene, and internal transcribed spacer 2, complete sequence; and 26S ribosomal RNA gene, partial sequence	100	368	0	368	0	0	0	TATGGTTGTGAGTAAACTGTAATACTACACCAATCACTTTTTGGAGGAACAGCTGACGCCGTATGTCCATTACCTGCGAGGGAGATAACCGCTCACACACGCATGCCCGCGGGAATACCCACGGGCGCAATGTGCGTTCAAAGATTCGATGATTCACAAAATCTGCAATTCATATTACGTATCGCATTTCGCTGCGTTCTTCATCGATGCGAGAACCAAGAGATCCGTTGTTGGAAGTTTTTGGTATTAGTTGGTTGATTGTTTAATAGGTTATTGAAGTAAGCAATTTTAAATCGCGTGTAAATTAGTTTTTTATGATCCTTCCGCAGGTTCACCTACGGAAACCTTGTTACGACTTTTACTTCCTC	TATGGTTGTGAGTAAACTGTAATACTACACCAATCACTTTTTGGAGGAACAGCTGACGCCGTATGTCCATTACCTGCGAGGGAGATAACCGCTCACACACGCATGCCCGCGGGAATACCCACGGGCGCAATGTGCGTTCAAAGATTCGATGATTCACAAAATCTGCAATTCATATTACGTATCGCATTTCGCTGCGTTCTTCATCGATGCGAGAACCAAGAGATCCGTTGTTGGAAGTTTTTGGTATTAGTTGGTTGATTGTTTAATAGGTTATTGAAGTAAGCAATTTTAAATCGCGTGTAAATTAGTTTTTTATGATCCTTCCGCAGGTTCACCTACGGAAACCTTGTTACGACTTTTACTTCCTC	Ascomycota	Saccharomycetales	unplaced (Diutina)	Diutina
35	B136	MT988222	NR_077200.1	AAAGTATGGTTGTGAGTAAACTGTAATACTACACCAATCACTTTTTGGAGGAACAGCTGACGCCGTATGTCCATTACCTGCGAGGGAGATAACCGCTCACACACGCATGCCCGCGGGAATACCCACGGGCGCAATGTGCGTTCAAAGATTCGATGATTCACAAAATCTGCAATTCATATTACGTATCGCATTTCGCTGCGTTCTTCATCGATGCGAGAACCAAGAGATCCGTTGTTGGAAGTTTTTGGTATTAGTTGGTTGATTGTTTAATAGGTTATTGAAGTAAGCAATTTTAAATCGCGTGTAAATTAGTTTTTTATGATCCTTCCGCAGGTTCACCTACGGAAACCTTGTTACGACTTTTACTTCCTC	Diutina aff. catenulata		NR_077200.1 Diutina catenulata CBS 565 ITS region; from TYPE material >GU246267.1 Candida catenulata strain CBS 565 18S ribosomal RNA gene, partial sequence; internal transcribed spacer 1, 5.8S ribosomal RNA gene, and internal transcribed spacer 2, complete sequence; and 26S ribosomal RNA gene, partial sequence	100	372	0	372	0	0	0	AAAGTATGGTTGTGAGTAAACTGTAATACTACACCAATCACTTTTTGGAGGAACAGCTGACGCCGTATGTCCATTACCTGCGAGGGAGATAACCGCTCACACACGCATGCCCGCGGGAATACCCACGGGCGCAATGTGCGTTCAAAGATTCGATGATTCACAAAATCTGCAATTCATATTACGTATCGCATTTCGCTGCGTTCTTCATCGATGCGAGAACCAAGAGATCCGTTGTTGGAAGTTTTTGGTATTAGTTGGTTGATTGTTTAATAGGTTATTGAAGTAAGCAATTTTAAATCGCGTGTAAATTAGTTTTTTATGATCCTTCCGCAGGTTCACCTACGGAAACCTTGTTACGACTTTTACTTCCTC	AAAGTATGGTTGTGAGTAAACTGTAATACTACACCAATCACTTTTTGGAGGAACAGCTGACGCCGTATGTCCATTACCTGCGAGGGAGATAACCGCTCACACACGCATGCCCGCGGGAATACCCACGGGCGCAATGTGCGTTCAAAGATTCGATGATTCACAAAATCTGCAATTCATATTACGTATCGCATTTCGCTGCGTTCTTCATCGATGCGAGAACCAAGAGATCCGTTGTTGGAAGTTTTTGGTATTAGTTGGTTGATTGTTTAATAGGTTATTGAAGTAAGCAATTTTAAATCGCGTGTAAATTAGTTTTTTATGATCCTTCCGCAGGTTCACCTACGGAAACCTTGTTACGACTTTTACTTCCTC	Ascomycota	Saccharomycetales	unplaced (Diutina)	Diutina
36	B137	MT988223	NR_077200.1	AAAGTATGGTTGTGAGTAAACTGTAATACTACACCAATCACTTTTTGGAGGAACAGCTGACGCCGTATGTCCATTACCTGCGAGGGAGATAACCGCTCACACACGCATGCCCGCGGGAATACCCACGGGCGCAATGTGCGTTCAAAGATTCGATGATTCACAAAATCTGCAATTCATATTACGTATCGCATTTCGCTGCGTTCTTCATCGATGCGAGAACCAAGAGATCCGTTGTTGGAAGTTTTTGGTATTAGTTGGTTGATTGTTTAATAGGTTATTGAAGTAAGCAATTTTAAATCGCGTGTAAATTAGTTTTTTATGATCCTTCCGCAGGTTCACCTACGGAAACCTTGTTACGACTTTTACTTCCTC	Diutina aff. catenulata		NR_077200.1 Diutina catenulata CBS 565 ITS region; from TYPE material >GU246267.1 Candida catenulata strain CBS 565 18S ribosomal RNA gene, partial sequence; internal transcribed spacer 1, 5.8S ribosomal RNA gene, and internal transcribed spacer 2, complete sequence; and 26S ribosomal RNA gene, partial sequence	100	372	0	372	0	0	0	AAAGTATGGTTGTGAGTAAACTGTAATACTACACCAATCACTTTTTGGAGGAACAGCTGACGCCGTATGTCCATTACCTGCGAGGGAGATAACCGCTCACACACGCATGCCCGCGGGAATACCCACGGGCGCAATGTGCGTTCAAAGATTCGATGATTCACAAAATCTGCAATTCATATTACGTATCGCATTTCGCTGCGTTCTTCATCGATGCGAGAACCAAGAGATCCGTTGTTGGAAGTTTTTGGTATTAGTTGGTTGATTGTTTAATAGGTTATTGAAGTAAGCAATTTTAAATCGCGTGTAAATTAGTTTTTTATGATCCTTCCGCAGGTTCACCTACGGAAACCTTGTTACGACTTTTACTTCCTC	AAAGTATGGTTGTGAGTAAACTGTAATACTACACCAATCACTTTTTGGAGGAACAGCTGACGCCGTATGTCCATTACCTGCGAGGGAGATAACCGCTCACACACGCATGCCCGCGGGAATACCCACGGGCGCAATGTGCGTTCAAAGATTCGATGATTCACAAAATCTGCAATTCATATTACGTATCGCATTTCGCTGCGTTCTTCATCGATGCGAGAACCAAGAGATCCGTTGTTGGAAGTTTTTGGTATTAGTTGGTTGATTGTTTAATAGGTTATTGAAGTAAGCAATTTTAAATCGCGTGTAAATTAGTTTTTTATGATCCTTCCGCAGGTTCACCTACGGAAACCTTGTTACGACTTTTACTTCCTC	Ascomycota	Saccharomycetales	unplaced (Diutina)	Diutina
37	B139	MT988168	KJ451657.1	GGCGAATGTCGTGCTGTAAACGTGTTTGACAGCGCGGTTGATATTTYGGAGCAACGCCTAACCGGGGGTTAGAGGGGATGCGACGCTCAAACAGGCATGCCTCGAGGAATGCCTCGAGGCGCAATGTGCGTTCAAAGATTCGATGATTCACGTCTGCAAGTCATACTACGTATCGCAATTCGCTGCGTTCTTCATCGATGCGAGAACCAAGAGATCCGTTGTTGAAAGTTTTGATTTAAATGATTCGAATAAAAAAATTTATTTTTTTGTTCGCAAATGCAAAGTGTATAATTCTTTTTAATGATCCTTCCGCAGGTTCACCTACGGAAACCTTGTTACGACTTTTACTTCCTCTAAATGACCAA	Clavispora aff. lusitaniae		KJ451657.1 Clavispora lusitaniae isolate LMICRO133 18S ribosomal RNA gene, partial sequence; internal transcribed spacer 1, 5.8S ribosomal RNA gene, and internal transcribed spacer 2, complete sequence; and 28S ribosomal RNA gene, partial sequence	99.454	366	0	364	1	1	1	GGCG-AATGTCGTGCTGTAAACGTGTTTGACAGCGCGGTTGATATTTYGGAGCAACGCCTAACCGGGGGTTAGAGGGGATGCGACGCTCAAACAGGCATGCCTCGAGGAATGCCTCGAGGCGCAATGTGCGTTCAAAGATTCGATGATTCACGTCTGCAAGTCATACTACGTATCGCAATTCGCTGCGTTCTTCATCGATGCGAGAACCAAGAGATCCGTTGTTGAAAGTTTTGATTTAAATGATTCGAATAAAAAAATTTATTTTTTTGTTCGCAAATGCAAAGTGTATAATTCTTTTTAATGATCCTTCCGCAGGTTCACCTACGGAAACCTTGTTACGACTTTTACTTCCTCTAAATGACCAA	GGCGAAATGTCGTGCTGTAAACGTGTTTGACAGCGCGGTTGATATTTCGGAGCAACGCCTAACCGGGGGTTAGAGGGGATGCGACGCTCAAACAGGCATGCCTCGAGGAATGCCTCGAGGCGCAATGTGCGTTCAAAGATTCGATGATTCACGTCTGCAAGTCATACTACGTATCGCAATTCGCTGCGTTCTTCATCGATGCGAGAACCAAGAGATCCGTTGTTGAAAGTTTTGATTTAAATGATTCGAATAAAAAAATTTATTTTTTTGTTCGCAAATGCAAAGTGTATAATTCTTTTTAATGATCCTTCCGCAGGTTCACCTACGGAAACCTTGTTACGACTTTTACTTCCTCTAAATGACCAA	Ascomycota	Saccharomycetales	Metschnikowiaceae	Clavispora
38	B140	MT988169	MT731389.1	CGTGTTTGACAGCGCGGTTGATATTTCGGAAGCAACGCCTAACCGGGGGTTAGAGGGGAYGCGACGCTCAAACAGGCAYGCCTCGAGGAAWGCCTCGAGGCGCAAWGTGCGTTCAAAGATTCGATGATTCACGTCTGCAAGTCATACTACGTATCGCAATTCGCTGCGTTCTTCATCGATGCGAGAACCAAGAGATCCGTTGTTGAAAGTTTTGATTTAAATGATTCGAATAAAAAAATTTATTTTTTTGTTCGCAAATGCAAAGTGTATAATTCTTTTTAATGATCCTTCCGCAG	Clavispora aff. lusitaniae		MT731389.1 Clavispora lusitaniae isolate L65/18 small subunit ribosomal RNA gene, partial sequence; internal transcribed spacer 1, 5.8S ribosomal RNA gene, and internal transcribed spacer 2, complete sequence; and large subunit ribosomal RNA gene, partial sequence	98.311	296	7.53e-148	291	4	1	1	CGTGTTTGACAGCGCGGTTGATATTTCGGAAGCAACGCCTAACCGGGGGTTAGAGGGGAYGCGACGCTCAAACAGGCAYGCCTCGAGGAAWGCCTCGAGGCGCAAWGTGCGTTCAAAGATTCGATGATTCACGTCTGCAAGTCATACTACGTATCGCAATTCGCTGCGTTCTTCATCGATGCGAGAACCAAGAGATCCGTTGTTGAAAGTTTTGATTTAAATGATTCGAATAAAAAAATTTATTTTTTTGTTCGCAAATGCAAAGTGTATAATTCTTTTTAATGATCCTTCCGCAG	CGTGTTTGACAGCGCGGTTGATATTTCGGA-GCAACGCCTAACCGGGGGTTAGAGGGGATGCGACGCTCAAACAGGCATGCCTCGAGGAATGCCTCGAGGCGCAATGTGCGTTCAAAGATTCGATGATTCACGTCTGCAAGTCATACTACGTATCGCAATTCGCTGCGTTCTTCATCGATGCGAGAACCAAGAGATCCGTTGTTGAAAGTTTTGATTTAAATGATTCGAATAAAAAAATTTATTTTTTTGTTCGCAAATGCAAAGTGTATAATTCTTTTTAATGATCCTTCCGCAG	Ascomycota	Saccharomycetales	Metschnikowiaceae	Clavispora
39	B142	MT988170	KY037837.1	GCCAAGGTTGTAAAACTTATTCTACAATCTTTTGATATTTGGCCGTAGCAAAACCAAACCGAAGGTTTGAGAGTAAACATCGCTCATTCACGCATGCCTTGAGGAATACCTTAAGGCGCAATGTGCGTTCAAAAATTCAATGATTCACGTCTGCRAGTCATATTACGTATCGCAATTCGCTGCGTTCTTCATCGATGCGAGAACCAAGAGATCCGTTGTTGAAAGTTTTTTCTTTTT	Metschnikowia aff. gruessii		KY037837.1 Metschnikowia gruessii UCDFST:11-1106 internal transcribed spacer 1, partial sequence; 5.8S ribosomal RNA gene and internal transcribed spacer 2, complete sequence; and large subunit ribosomal RNA gene, partial sequence	99.156	237	4.77e-119	235	2	0	0	GCCAAGGTTGTAAAACTTATTCTACAATCTTTTGATATTTGGCCGTAGCAAAACCAAACCGAAGGTTTGAGAGTAAACATCGCTCATTCACGCATGCCTTGAGGAATACCTTAAGGCGCAATGTGCGTTCAAAAATTCAATGATTCACGTCTGCRAGTCATATTACGTATCGCAATTCGCTGCGTTCTTCATCGATGCGAGAACCAAGAGATCCGTTGTTGAAAGTTTTTTCTTTTT	GCCAAGGTTGTAAAACTTATTCTACAATCTTTTGATATTTGGCCGTAGCAAAACCAAACCGAAGGTTTGAGAGTAAACATCGCTCATTCACGCATGCCTTGAGGAATACCTTAAGGCGCAATGTGCGTTCAAAAATTCAATGATTCACGTCTGCAAGTCATATTACGTATCGCAATTCGCTGCGTTCTTCATCGATGCGAGAACCAAGAGATCCGTTGTTGAAAGTTTTTTTTTTTT	Ascomycota	Saccharomycetales	Metschnikowiaceae	Metschnikowia
40	B069	MT988171	AM160618.1	CTGGGGCTAAAACTTATTCTAGCGCCGTTGATATTAGGCCGAAGCAGGACCAAACCRGAGGTTTGAGAGTAAATATCGCTCACCCACGCATGCCCTGGGGAATACCCCGGGGCGCAATGTGCGTTCAAAGATTCAATGATTCACGTCTGCAAGTCATATTACGTATCGCAATTCGCTGCGTTCTTCATCGATGCGAGAACCAAGAGATCCGTTGTTGAAAGTTTTTTAA	Metschnikowia sp.		AM160618.1 Metschnikowia aff. fructicola HA 1634 18S rRNA gene (partial), ITS1, 5.8S rRNA gene and ITS2, strain HA 1634	99.563	229	2.76e-116	228	1	0	0	CTGGGGCTAAAACTTATTCTAGCGCCGTTGATATTAGGCCGAAGCAGGACCAAACCRGAGGTTTGAGAGTAAATATCGCTCACCCACGCATGCCCTGGGGAATACCCCGGGGCGCAATGTGCGTTCAAAGATTCAATGATTCACGTCTGCAAGTCATATTACGTATCGCAATTCGCTGCGTTCTTCATCGATGCGAGAACCAAGAGATCCGTTGTTGAAAGTTTTTTAA	CTGGGGCTAAAACTTATTCTAGCGCCGTTGATATTAGGCCGAAGCAGGACCAAACCAGAGGTTTGAGAGTAAATATCGCTCACCCACGCATGCCCTGGGGAATACCCCGGGGCGCAATGTGCGTTCAAAGATTCAATGATTCACGTCTGCAAGTCATATTACGTATCGCAATTCGCTGCGTTCTTCATCGATGCGAGAACCAAGAGATCCGTTGTTGAAAGTTTTTTAA	Ascomycota	Saccharomycetales	Metschnikowiaceae	Metschnikowia
41	B080	MT988172		TGGGGCTAAAACTTATTCTAGCGCCGTTGATATTAGGCCGAAGCAGGACCAAACCGGAGGTTTGAGAGTAAATATCGCTCACCCACGCATGCCCTGGGGAATACCCCGGGGCGCAATGTGCGTTCAAAGATTCAATGATTCACGTCTGCAAGTCATATTACGTATCGCAATTCGCTGCGTTCTTCATCGATGCGAGAACCAAGAGATCCGTTGTTGAAAGTTTTTTAATTG	Metschnikowia sp.	multiple 100% identity matches to several Metschnikowia species			231	1.67e-118	231	0	0	0	TGGGGCTAAAACTTATTCTAGCGCCGTTGATATTAGGCCGAAGCAGGACCAAACCGGAGGTTTGAGAGTAAATATCGCTCACCCACGCATGCCCTGGGGAATACCCCGGGGCGCAATGTGCGTTCAAAGATTCAATGATTCACGTCTGCAAGTCATATTACGTATCGCAATTCGCTGCGTTCTTCATCGATGCGAGAACCAAGAGATCCGTTGTTGAAAGTTTTTTAATTG	TGGGGCTAAAACTTATTCTAGCGCCGTTGATATTAGGCCGAAGCAGGACCAAACCGGAGGTTTGAGAGTAAATATCGCTCACCCACGCATGCCCTGGGGAATACCCCGGGGCGCAATGTGCGTTCAAAGATTCAATGATTCACGTCTGCAAGTCATATTACGTATCGCAATTCGCTGCGTTCTTCATCGATGCGAGAACCAAGAGATCCGTTGTTGAAAGTTTTTTAATTG	Ascomycota	Saccharomycetales	Metschnikowiaceae	Metschnikowia
42	B084	MT988173		GGGGCTAAAACTTATTCTAGCGCCGTTGATATTAGGCCGAAGCAGGACCAAACCGGAGGTTTGAGAGTAAATATCGCTCACCCACGCATGCCCTGGGGAATACCCCGGGGCGCAATGTGCGTTCAAAGATTCAATGATTCACGTCTGCAAGTCATATTACGTATCGCAATTCGCTGCGTTCTTCATCGATGCGAGAACCAAGAGATCCGTTGTTGAAAGTTTTTT	Metschnikowia sp.	multiple 100% identity matches to several Metschnikowia species			225	3.5e-115	225	0	0	0	GGGGCTAAAACTTATTCTAGCGCCGTTGATATTAGGCCGAAGCAGGACCAAACCGGAGGTTTGAGAGTAAATATCGCTCACCCACGCATGCCCTGGGGAATACCCCGGGGCGCAATGTGCGTTCAAAGATTCAATGATTCACGTCTGCAAGTCATATTACGTATCGCAATTCGCTGCGTTCTTCATCGATGCGAGAACCAAGAGATCCGTTGTTGAAAGTTTTTT	GGGGCTAAAACTTATTCTAGCGCCGTTGATATTAGGCCGAAGCAGGACCAAACCGGAGGTTTGAGAGTAAATATCGCTCACCCACGCATGCCCTGGGGAATACCCCGGGGCGCAATGTGCGTTCAAAGATTCAATGATTCACGTCTGCAAGTCATATTACGTATCGCAATTCGCTGCGTTCTTCATCGATGCGAGAACCAAGAGATCCGTTGTTGAAAGTTTTTT	Ascomycota	Saccharomycetales	Metschnikowiaceae	Metschnikowia
43	B095	MT988174	MG589135.1	TTGAGAGTAAATATCGCTCACCCACGCATGCCCTGGGGAATACCCCGGGGCGCAATGTGCGTTCAAAGATTCAAYGATTCACGTCTGCWAGTCATATTACGTATCGCAATTCGCTGCGTTCTTCATCGATGCKAGAACCAAGAGATCCGTTGTTGAAAGTTTTTTT	Metschnikowia sp.		MG589135.1 [Candida] pimensis strain HU-9269 small subunit ribosomal RNA gene, partial sequence; internal transcribed spacer 1 and 5.8S ribosomal RNA gene, complete sequence; and internal transcribed spacer 2, partial sequence	98.193	166	3.35e-79	163	3	0	0	TTGAGAGTAAATATCGCTCACCCACGCATGCCCTGGGGAATACCCCGGGGCGCAATGTGCGTTCAAAGATTCAAYGATTCACGTCTGCWAGTCATATTACGTATCGCAATTCGCTGCGTTCTTCATCGATGCKAGAACCAAGAGATCCGTTGTTGAAAGTTTTTTT	TTGAGAGTAAATATCGCTCACCCACGCATGCCCTGGGGAATACCCCGGGGCGCAATGTGCGTTCAAAGATTCAATGATTCACGTCTGCAAGTCATATTACGTATCGCAATTCGCTGCGTTCTTCATCGATGCGAGAACCAAGAGATCCGTTGTTGAAAGTTTTTTT	Ascomycota	Saccharomycetales	Metschnikowiaceae	Metschnikowia
44	B138	MT988175	NR_111252.1	TACAAAACCAAACCATAGGTTTGAGAGTAAATATCGCTCATCCACGCATGCCTTGAGGAATACCTTAAGGCGCAATGTGCGTTCAAAAATTCAATGATTCACGTCTGCAAGTCATATTACGTATCGCAATTCGCTGCGTTCTTCATCGATGCGAGAACCAAGAGATCCGTTGTTGAAAGTTTTTTTTT	Metschnikowia sp.	multiple 100% identity matches to 2 Metschnikowia species: M. reukaufii und M. vanudenii (MN128580.1)	NR_111252.1 Metschnikowia reukaufii CBS 5834 ITS region; from TYPE material >EF568059.1 Metschnikowia reukaufii strain WM 798 isolate ISHAM-ITS_ID MITS2775 18S ribosomal RNA gene, partial sequence; internal transcribed spacer 1, 5.8S ribosomal RNA gene, and internal transcribed spacer 2, complete sequence; and 28S ribosomal RNA gene, partial sequence	100	188	1.06e-94	188	0	0	0	TACAAAACCAAACCATAGGTTTGAGAGTAAATATCGCTCATCCACGCATGCCTTGAGGAATACCTTAAGGCGCAATGTGCGTTCAAAAATTCAATGATTCACGTCTGCAAGTCATATTACGTATCGCAATTCGCTGCGTTCTTCATCGATGCGAGAACCAAGAGATCCGTTGTTGAAAGTTTTTTTTT	TACAAAACCAAACCATAGGTTTGAGAGTAAATATCGCTCATCCACGCATGCCTTGAGGAATACCTTAAGGCGCAATGTGCGTTCAAAAATTCAATGATTCACGTCTGCAAGTCATATTACGTATCGCAATTCGCTGCGTTCTTCATCGATGCGAGAACCAAGAGATCCGTTGTTGAAAGTTTTTTTTT	Ascomycota	Saccharomycetales	Metschnikowiaceae	Metschnikowia
45	B145	MT988176	MH023205.1	AAGCAGGACCAAACCRGAGGTTTGAGAGTAAATATCGCTCACCCACGCATGCCCTGGGGAATACCCCGGGGCGCAATGTGCGTTCAAAGATTCAATGATTCACGTCTGCAAGTCATATTACGTATCGCAATTCGCTGCGTTCTTCATCGATGCGAGAACCAAGAGATCCGTTGTTGAAAGTTTTTT	Metschnikowia sp.	pulcherrima/fructicola clade	MH023205.1 Metschnikowia sinensis strain SF4-110-4I3 internal transcribed spacer 1, partial sequence; 5.8S ribosomal RNA gene, complete sequence; and internal transcribed spacer 2, partial sequence	99.462	186	1.74e-92	185	1	0	0	AAGCAGGACCAAACCRGAGGTTTGAGAGTAAATATCGCTCACCCACGCATGCCCTGGGGAATACCCCGGGGCGCAATGTGCGTTCAAAGATTCAATGATTCACGTCTGCAAGTCATATTACGTATCGCAATTCGCTGCGTTCTTCATCGATGCGAGAACCAAGAGATCCGTTGTTGAAAGTTTTTT	AAGCAGGACCAAACCGGAGGTTTGAGAGTAAATATCGCTCACCCACGCATGCCCTGGGGAATACCCCGGGGCGCAATGTGCGTTCAAAGATTCAATGATTCACGTCTGCAAGTCATATTACGTATCGCAATTCGCTGCGTTCTTCATCGATGCGAGAACCAAGAGATCCGTTGTTGAAAGTTTTTT	Ascomycota	Saccharomycetales	Metschnikowiaceae	Metschnikowia
46	B146	MT988177	MH023215.1	GGGGCTAAAACTTATTCTAGCGCCGTTGATATTAGGCCGAAGCAGGACCAAACCGGAGGTTTGAGAGTAAATATCGCTCACCCACGCATGCCCTGGGGAATACCCCGGGGCGCAATGTGCGTTCAAAGATTCAATGATTCACGTCTGCAAGTCATATTACGTATCGCAATTCGCTGCGTTCTTCATCGATGCGAGAACCAAGAGATCCGTTGTTGAAAGTTTTTKAAT	Metschnikowia sp.	pulcherrima/fructicola clade	MH023215.1 Metschnikowia pulcherrima strain SF3-110-3II2 small subunit ribosomal RNA gene, partial sequence; internal transcribed spacer 1, 5.8S ribosomal RNA gene, and internal transcribed spacer 2, complete sequence; and large subunit ribosomal RNA gene, partial sequence	99.561	228	9.94e-116	227	1	0	0	GGGGCTAAAACTTATTCTAGCGCCGTTGATATTAGGCCGAAGCAGGACCAAACCGGAGGTTTGAGAGTAAATATCGCTCACCCACGCATGCCCTGGGGAATACCCCGGGGCGCAATGTGCGTTCAAAGATTCAATGATTCACGTCTGCAAGTCATATTACGTATCGCAATTCGCTGCGTTCTTCATCGATGCGAGAACCAAGAGATCCGTTGTTGAAAGTTTTTKAAT	GGGGCTAAAACTTATTCTAGCGCCGTTGATATTAGGCCGAAGCAGGACCAAACCGGAGGTTTGAGAGTAAATATCGCTCACCCACGCATGCCCTGGGGAATACCCCGGGGCGCAATGTGCGTTCAAAGATTCAATGATTCACGTCTGCAAGTCATATTACGTATCGCAATTCGCTGCGTTCTTCATCGATGCGAGAACCAAGAGATCCGTTGTTGAAAGTTTTTTAAT	Ascomycota	Saccharomycetales	Metschnikowiaceae	Metschnikowia
47	B147	MT988178	MH023215.1	TGGGGCTAAAACTTATTCTAGCGCCGTTGATATTAKGCCGAAGCAGGACCAAACCRGAGGTTTGAGAGTAAATATCGCTCACCCACGCATGCCCTGGGGAATACCCCGGGGCGCAATGTGCGTTCAAAGATTCAATGATTCACGTCTGCAAGTCATATTACGTATCGCAATTCGCTGCGTTCTTCATCGATGCGAGAACCAAGAGATCCGTTGTTGAAAGTTTTTT	Metschnikowia sp.	pulcherrima/fructicola clade	MH023215.1 Metschnikowia pulcherrima strain SF3-110-3II2 small subunit ribosomal RNA gene, partial sequence; internal transcribed spacer 1, 5.8S ribosomal RNA gene, and internal transcribed spacer 2, complete sequence; and large subunit ribosomal RNA gene, partial sequence	99.115	226	1.64e-113	224	2	0	0	TGGGGCTAAAACTTATTCTAGCGCCGTTGATATTAKGCCGAAGCAGGACCAAACCRGAGGTTTGAGAGTAAATATCGCTCACCCACGCATGCCCTGGGGAATACCCCGGGGCGCAATGTGCGTTCAAAGATTCAATGATTCACGTCTGCAAGTCATATTACGTATCGCAATTCGCTGCGTTCTTCATCGATGCGAGAACCAAGAGATCCGTTGTTGAAAGTTTTTT	TGGGGCTAAAACTTATTCTAGCGCCGTTGATATTAGGCCGAAGCAGGACCAAACCGGAGGTTTGAGAGTAAATATCGCTCACCCACGCATGCCCTGGGGAATACCCCGGGGCGCAATGTGCGTTCAAAGATTCAATGATTCACGTCTGCAAGTCATATTACGTATCGCAATTCGCTGCGTTCTTCATCGATGCGAGAACCAAGAGATCCGTTGTTGAAAGTTTTTT	Ascomycota	Saccharomycetales	Metschnikowiaceae	Metschnikowia
48	B164	MT988179	MH023205.1	GAGGTTTGAGAGTAAATATCGCTCACCCACGCATGCCCTGGGGAATACCCCGGGGCGCAATGTGCGTTCAAAGATTCAATGATTCACGTCTGCAAGTCATATTACGTATCGCAATTCGCTGCGTTCTTCATCGATGCGAGAACCAAGAGATCCGTTGTTGAAAGTTTTTT	Metschnikowia sp.	pulcherrima/fructicola clade	MH023205.1 Metschnikowia sinensis strain SF4-110-4I3 internal transcribed spacer 1, partial sequence; 5.8S ribosomal RNA gene, complete sequence; and internal transcribed spacer 2, partial sequence	100	170	9.58e-85	170	0	0	0	GAGGTTTGAGAGTAAATATCGCTCACCCACGCATGCCCTGGGGAATACCCCGGGGCGCAATGTGCGTTCAAAGATTCAATGATTCACGTCTGCAAGTCATATTACGTATCGCAATTCGCTGCGTTCTTCATCGATGCGAGAACCAAGAGATCCGTTGTTGAAAGTTTTTT	GAGGTTTGAGAGTAAATATCGCTCACCCACGCATGCCCTGGGGAATACCCCGGGGCGCAATGTGCGTTCAAAGATTCAATGATTCACGTCTGCAAGTCATATTACGTATCGCAATTCGCTGCGTTCTTCATCGATGCGAGAACCAAGAGATCCGTTGTTGAAAGTTTTTT	Ascomycota	Saccharomycetales	Metschnikowiaceae	Metschnikowia
49	B166	MT988180	MK352050.1	CCCTTTAAGCACAACTCTAATCTTAACCGTCAATAATTTTTTAAAAAACTTTCAACAACGGATCTCTTGGTTCTCCCATCCATGAAAAACCCACCGAATTGCGATACGTAATATGACTTGCAAACGTGAATCATTGAATCTTTGAACGCCCATTGCGCCCCGGGGTATTCCCCAGGGCATGCGTGGGGGAGCGATATTTACTCTCAAACCTCCGGTTTGGTCCTGCTTCGGCCTAATATCAACGGCGCTAGAATAAGTTTTACCCCCCTCCTTTTTCCTCCCCCCCGTAAAACTACCCGCTGAACTTAAGCATATCAATAAGCGGAGGAAAA	Metschnikowia sp.	lowQ Seq	MK352050.1 Metschnikowia pulcherrima isolate 70 internal transcribed spacer 1, partial sequence; 5.8S ribosomal RNA gene and internal transcribed spacer 2, complete sequence; and large subunit ribosomal RNA gene, partial sequence	95.509	334	5.34e-150	319	13	2	2	CCCTTTAAGCACAA-CTCT-AATCTTAACCGTCAATAATTTTTTAAAAAACTTTCAACAACGGATCTCTTGGTTCTCCCATCCATGAAAAACCCACCGAATTGCGATACGTAATATGACTTGCAAACGTGAATCATTGAATCTTTGAACGCCCATTGCGCCCCGGGGTATTCCCCAGGGCATGCGTGGGGGAGCGATATTTACTCTCAAACCTCCGGTTTGGTCCTGCTTCGGCCTAATATCAACGGCGCTAGAATAAGTTTTACCCCCCTCCTTTTTCCTCCCCCCCGTAAAACTACCCGCTGAACTTAAGCATATCAATAAGCGGAGGAAAA	CCTTTTACGCACAAACTCTAAATCTTAACCGTCAATAATTTTTTAAAAAACTTTCACCAACGGATCTCTTGGTTCTCGCATCGATGAAAAACGCACCGAATTGCGATACGTAATATGACTTGCAAACGTGAATCATTGAATCTTTGAACGCACATTGCGCCCCGGGGTATTCCCCAGGGCATGCGTGGGTGAGCGATATTTACTCTCAAACCTCCGGTTTGGTCCTGCTTCGGCCTAATATCAACGGCGCTAGAATAAGTTTTAGCCCCATTCTTTTTCCTCACCCTCGTAAAACTACCCGCTGAACTTAAGCATATCAATAAGCGGAGGAAAA	Ascomycota	Saccharomycetales	Metschnikowiaceae	Metschnikowia
50	B170	MT988181	MH023205.1	CCAAACCRGAGGTTTGAGAGTAAATATCGCTCACCCACGCATGCCCTGGGGAATACCCCGGGGCGCAATGTGCGTTCAAAGATTCAATGATTCACGTCTGCAAGTCATATTACGTATCGCAATTCGCTGCGTTCTTCATCGATGCGAGAACCAAGAGATCCGTTGTTGAAAGTTTTTT	Metschnikowia sp.	pulcherrima/fructicola clade	MH023205.1 Metschnikowia sinensis strain SF4-110-4I3 internal transcribed spacer 1, partial sequence; 5.8S ribosomal RNA gene, complete sequence; and internal transcribed spacer 2, partial sequence	99.438	178	4.67e-88	177	1	0	0	CCAAACCRGAGGTTTGAGAGTAAATATCGCTCACCCACGCATGCCCTGGGGAATACCCCGGGGCGCAATGTGCGTTCAAAGATTCAATGATTCACGTCTGCAAGTCATATTACGTATCGCAATTCGCTGCGTTCTTCATCGATGCGAGAACCAAGAGATCCGTTGTTGAAAGTTTTTT	CCAAACCGGAGGTTTGAGAGTAAATATCGCTCACCCACGCATGCCCTGGGGAATACCCCGGGGCGCAATGTGCGTTCAAAGATTCAATGATTCACGTCTGCAAGTCATATTACGTATCGCAATTCGCTGCGTTCTTCATCGATGCGAGAACCAAGAGATCCGTTGTTGAAAGTTTTTT	Ascomycota	Saccharomycetales	Metschnikowiaceae	Metschnikowia
51	B171	MT988182	KM209324.1	TTCAAAAACTTTCAACAACGGATCTCTTGGTTCTCGCATCGATGAAGAACGCAGCGAATTGCGATACGTAATATGACTTGCAGACGTGAATCATTGAATCTTTGAACGCACATTGCGCCCCGGGGTATTCCCCAGGGCATGCGTGGGTGAGCGATATTTACTCTCAAACCTCCGGTTTGGTCCTGCTTCGGCCTAATATCAACGGCGCTAGAATAAGTTTTAGCCCCATTCTTCTTCCTCACCCTCGTAAGACTACCCGCTGAACTTAAGCATATCAATAAGCGGAGGAA	Metschnikowia sp.	pulcherrima/fructicola clade	KM209324.1 Metschnikowia sp. 11-578 clone Ipub71 18S ribosomal RNA gene, partial sequence; internal transcribed spacer 1, 5.8S ribosomal RNA gene, and internal transcribed spacer 2, complete sequence; and 28S ribosomal RNA gene, partial sequence	100	290	4.2e-151	290	0	0	0	TTCAAAAACTTTCAACAACGGATCTCTTGGTTCTCGCATCGATGAAGAACGCAGCGAATTGCGATACGTAATATGACTTGCAGACGTGAATCATTGAATCTTTGAACGCACATTGCGCCCCGGGGTATTCCCCAGGGCATGCGTGGGTGAGCGATATTTACTCTCAAACCTCCGGTTTGGTCCTGCTTCGGCCTAATATCAACGGCGCTAGAATAAGTTTTAGCCCCATTCTTCTTCCTCACCCTCGTAAGACTACCCGCTGAACTTAAGCATATCAATAAGCGGAGGAA	TTCAAAAACTTTCAACAACGGATCTCTTGGTTCTCGCATCGATGAAGAACGCAGCGAATTGCGATACGTAATATGACTTGCAGACGTGAATCATTGAATCTTTGAACGCACATTGCGCCCCGGGGTATTCCCCAGGGCATGCGTGGGTGAGCGATATTTACTCTCAAACCTCCGGTTTGGTCCTGCTTCGGCCTAATATCAACGGCGCTAGAATAAGTTTTAGCCCCATTCTTCTTCCTCACCCTCGTAAGACTACCCGCTGAACTTAAGCATATCAATAAGCGGAGGAA	Ascomycota	Saccharomycetales	Metschnikowiaceae	Metschnikowia
52	B172	MT988183	MH023215.1	AAACTTATTCTAGCGCCGTTGATATTAGGCCGAAGCAGGACCAAACCRGAGGTTTGAGAGTAAATATCGCTCACCCACGCATGCCCTGGGGAATACCCCGGGGCGCAATGTGCGTTCAAAGATTCAATGATTCACGTCTGCAAGTCATATTACGTATCGCAATTCGCTGCGTTCTTCATCGATGCGAGAACCAAGAGATCCGTTGTTGAAAGTTTTTT	Metschnikowia sp.	pulcherrima/fructicola clade	MH023215.1 Metschnikowia pulcherrima strain SF3-110-3II2 small subunit ribosomal RNA gene, partial sequence; internal transcribed spacer 1, 5.8S ribosomal RNA gene, and internal transcribed spacer 2, complete sequence; and large subunit ribosomal RNA gene, partial sequence	99.541	218	3.42e-110	217	1	0	0	AAACTTATTCTAGCGCCGTTGATATTAGGCCGAAGCAGGACCAAACCRGAGGTTTGAGAGTAAATATCGCTCACCCACGCATGCCCTGGGGAATACCCCGGGGCGCAATGTGCGTTCAAAGATTCAATGATTCACGTCTGCAAGTCATATTACGTATCGCAATTCGCTGCGTTCTTCATCGATGCGAGAACCAAGAGATCCGTTGTTGAAAGTTTTTT	AAACTTATTCTAGCGCCGTTGATATTAGGCCGAAGCAGGACCAAACCGGAGGTTTGAGAGTAAATATCGCTCACCCACGCATGCCCTGGGGAATACCCCGGGGCGCAATGTGCGTTCAAAGATTCAATGATTCACGTCTGCAAGTCATATTACGTATCGCAATTCGCTGCGTTCTTCATCGATGCGAGAACCAAGAGATCCGTTGTTGAAAGTTTTTT	Ascomycota	Saccharomycetales	Metschnikowiaceae	Metschnikowia
53	B176	MT988184	MH023205.1	GAGGTTTGAGAGTAAATATCGCTCACCCACGCATGCCCTGGGGAATACCCCGGGGCGCAATGTGCGTTCAAAGATTCAATGATTCACGTCTGCAAGTCATATTACGTATCGCAATTCGCTGCGTTCTTCATCGATGCGAGAACCAAGAGATCCGTTGTTGAAAGTTTTTT	Metschnikowia sp.	pulcherrima/fructicola clade	MH023205.1 Metschnikowia sinensis strain SF4-110-4I3 internal transcribed spacer 1, partial sequence; 5.8S ribosomal RNA gene, complete sequence; and internal transcribed spacer 2, partial sequence	100	170	9.58e-85	170	0	0	0	GAGGTTTGAGAGTAAATATCGCTCACCCACGCATGCCCTGGGGAATACCCCGGGGCGCAATGTGCGTTCAAAGATTCAATGATTCACGTCTGCAAGTCATATTACGTATCGCAATTCGCTGCGTTCTTCATCGATGCGAGAACCAAGAGATCCGTTGTTGAAAGTTTTTT	GAGGTTTGAGAGTAAATATCGCTCACCCACGCATGCCCTGGGGAATACCCCGGGGCGCAATGTGCGTTCAAAGATTCAATGATTCACGTCTGCAAGTCATATTACGTATCGCAATTCGCTGCGTTCTTCATCGATGCGAGAACCAAGAGATCCGTTGTTGAAAGTTTTTT	Ascomycota	Saccharomycetales	Metschnikowiaceae	Metschnikowia
54	B182	MT988185	MK131396.1	ACCAAACCAARGGTTTGAGGGTAAATATCGCTCATTCACGCATGCCTTGAGGAATACCTTAAGGCGCAATGTGCGTTCAAAGATTCAATGATTCACGTCTGCAAGTCATATTACGTATCGCAATTCGCTGCGTTCTTCATCGATGCGAGAACCAAGAGATCCGTTGTTGAAAGTTTTTTTTTTWAACTTT	Metschnikowia sp.	pulcherrima/fructicola clade	MK131396.1 Metschnikowia rancensis isolate LE.153 small subunit ribosomal RNA gene, partial sequence; internal transcribed spacer 1, 5.8S ribosomal RNA gene, and internal transcribed spacer 2, complete sequence; and large subunit ribosomal RNA gene, partial sequence	98.947	190	1.39e-93	188	2	0	0	ACCAAACCAARGGTTTGAGGGTAAATATCGCTCATTCACGCATGCCTTGAGGAATACCTTAAGGCGCAATGTGCGTTCAAAGATTCAATGATTCACGTCTGCAAGTCATATTACGTATCGCAATTCGCTGCGTTCTTCATCGATGCGAGAACCAAGAGATCCGTTGTTGAAAGTTTTTTTTTTWAACTTT	ACCAAACCAAGGGTTTGAGGGTAAATATCGCTCATTCACGCATGCCTTGAGGAATACCTTAAGGCGCAATGTGCGTTCAAAGATTCAATGATTCACGTCTGCAAGTCATATTACGTATCGCAATTCGCTGCGTTCTTCATCGATGCGAGAACCAAGAGATCCGTTGTTGAAAGTTTTTTTTTTAAACTTT	Ascomycota	Saccharomycetales	Metschnikowiaceae	Metschnikowia
55	B188	MT988186	MH023215.1	TGGGGCTAAAACTTATTCTAGCGCCGTTGATATTAGGCCGAASCAGGACCAAACCRGAGGTTTGAGAGTAAATATCGCTCACCCACGCATGCCCTGGGGAATACCCCGGGGCGCAATGTGCGTTCAAAGATTCAATGATTCACGTCTGCAAGTCATATTACGTATCGCAATTCGCTGCGTTCTTCATCGATGCGAGAACCAAGAGATCCGTTGTTGAAAGTTTTTT	Metschnikowia sp.	pulcherrima/fructicola clade	MH023215.1 Metschnikowia pulcherrima strain SF3-110-3II2 small subunit ribosomal RNA gene, partial sequence; internal transcribed spacer 1, 5.8S ribosomal RNA gene, and internal transcribed spacer 2, complete sequence; and large subunit ribosomal RNA gene, partial sequence	99.115	226	1.64e-113	224	2	0	0	TGGGGCTAAAACTTATTCTAGCGCCGTTGATATTAGGCCGAASCAGGACCAAACCRGAGGTTTGAGAGTAAATATCGCTCACCCACGCATGCCCTGGGGAATACCCCGGGGCGCAATGTGCGTTCAAAGATTCAATGATTCACGTCTGCAAGTCATATTACGTATCGCAATTCGCTGCGTTCTTCATCGATGCGAGAACCAAGAGATCCGTTGTTGAAAGTTTTTT	TGGGGCTAAAACTTATTCTAGCGCCGTTGATATTAGGCCGAAGCAGGACCAAACCGGAGGTTTGAGAGTAAATATCGCTCACCCACGCATGCCCTGGGGAATACCCCGGGGCGCAATGTGCGTTCAAAGATTCAATGATTCACGTCTGCAAGTCATATTACGTATCGCAATTCGCTGCGTTCTTCATCGATGCGAGAACCAAGAGATCCGTTGTTGAAAGTTTTTT	Ascomycota	Saccharomycetales	Metschnikowiaceae	Metschnikowia
56	B191	MT988187	NR_130688.1	GTTCGCCGGCCGCCCCGCGCGCACAGTCTAGTTCGCGCAGAAGGCCCCTCGCTTTGGGCGCGCCGTCCACAGGGACAGCCCGCCAGGTCTGAAGCTCCGCTCCAAGAAGGAAACGACGCTCAGACAGGCATGCCCGCCGGAATACCAGCGGGCGCAATGTGCGTTCAAGAACTCGATGATTCACGATGGCTGCAATTCACACTAGGTATCGCATTTCGCTGCGCTCTTCATCGATGCGAGAACCAAGAGATCCGTTGTTGAAAGTTTTGTGGATTTCTTGCTTGACGGCGTGCGTTCGGTTTCGGTGTTTCGTGTCGCCCACGCAGTGTGGTGGATAAATCACAGTAATGATCCTTCCGCAG	Pichia aff. fermentans		NR_130688.1 Pichia fermentans ATCC 10651 ITS region; from TYPE material	100	362	0	362	0	0	0	GTTCGCCGGCCGCCCCGCGCGCACAGTCTAGTTCGCGCAGAAGGCCCCTCGCTTTGGGCGCGCCGTCCACAGGGACAGCCCGCCAGGTCTGAAGCTCCGCTCCAAGAAGGAAACGACGCTCAGACAGGCATGCCCGCCGGAATACCAGCGGGCGCAATGTGCGTTCAAGAACTCGATGATTCACGATGGCTGCAATTCACACTAGGTATCGCATTTCGCTGCGCTCTTCATCGATGCGAGAACCAAGAGATCCGTTGTTGAAAGTTTTGTGGATTTCTTGCTTGACGGCGTGCGTTCGGTTTCGGTGTTTCGTGTCGCCCACGCAGTGTGGTGGATAAATCACAGTAATGATCCTTCCGCAG	GTTCGCCGGCCGCCCCGCGCGCACAGTCTAGTTCGCGCAGAAGGCCCCTCGCTTTGGGCGCGCCGTCCACAGGGACAGCCCGCCAGGTCTGAAGCTCCGCTCCAAGAAGGAAACGACGCTCAGACAGGCATGCCCGCCGGAATACCAGCGGGCGCAATGTGCGTTCAAGAACTCGATGATTCACGATGGCTGCAATTCACACTAGGTATCGCATTTCGCTGCGCTCTTCATCGATGCGAGAACCAAGAGATCCGTTGTTGAAAGTTTTGTGGATTTCTTGCTTGACGGCGTGCGTTCGGTTTCGGTGTTTCGTGTCGCCCACGCAGTGTGGTGGATAAATCACAGTAATGATCCTTCCGCAG	Ascomycota	Saccharomycetales	Pichiaceae	Pichia
57	B144		MH985337.1	GAGGTCGAGCTTTTTGTTGTCTCGCAACACTCGCTCTCGGCCGCCAAGCGTCCCTGAAAAAAAGTCTAGTTCGCTCGGCCAGCTTCGCTCCCTTTCAGGCGAGTCGCAGCTCCGACGCTCTTTACACGTCGTCCGCTCCGCTCCCCCAACTCTGCGCACGCGCAAGATGGAAACGACGCTCAAACAGGCATGCCCCCCGGAATGCCGAGGGGCGCAATGTGCGTTCAAGAACTCGATGATTCACGATGGCTGCAATTCACACTAGGTATCGCATTTCGCTGCGCTCTTCATCGATGCGAGAACCAAGAGATCCGTTGTTGAAAGTTTTGTTTGTTTTTC	Pichia aff. kudriavzevii	WGS sequencing data this publication	MH985337.1 Pichia kudriavzevii isolate YF110805 small subunit ribosomal RNA gene, partial sequence; internal transcribed spacer 1 and 5.8S ribosomal RNA gene, complete sequence; and internal transcribed spacer 2, partial sequence	100	339	2.33e-178	339	0	0	0	GAGGTCGAGCTTTTTGTTGTCTCGCAACACTCGCTCTCGGCCGCCAAGCGTCCCTGAAAAAAAGTCTAGTTCGCTCGGCCAGCTTCGCTCCCTTTCAGGCGAGTCGCAGCTCCGACGCTCTTTACACGTCGTCCGCTCCGCTCCCCCAACTCTGCGCACGCGCAAGATGGAAACGACGCTCAAACAGGCATGCCCCCCGGAATGCCGAGGGGCGCAATGTGCGTTCAAGAACTCGATGATTCACGATGGCTGCAATTCACACTAGGTATCGCATTTCGCTGCGCTCTTCATCGATGCGAGAACCAAGAGATCCGTTGTTGAAAGTTTTGTTTGTTTTTC	GAGGTCGAGCTTTTTGTTGTCTCGCAACACTCGCTCTCGGCCGCCAAGCGTCCCTGAAAAAAAGTCTAGTTCGCTCGGCCAGCTTCGCTCCCTTTCAGGCGAGTCGCAGCTCCGACGCTCTTTACACGTCGTCCGCTCCGCTCCCCCAACTCTGCGCACGCGCAAGATGGAAACGACGCTCAAACAGGCATGCCCCCCGGAATGCCGAGGGGCGCAATGTGCGTTCAAGAACTCGATGATTCACGATGGCTGCAATTCACACTAGGTATCGCATTTCGCTGCGCTCTTCATCGATGCGAGAACCAAGAGATCCGTTGTTGAAAGTTTTGTTTGTTTTTC	Ascomycota	Saccharomycetales	Pichiaceae	Pichia
58	B087	MT988188	NR_153294.1	CGGCGCACAACATAGTTCGCTTCGCCCTCGTTTCTTTTCGGCGGGGCCAAGGCCGGGCCAGCTCCACTTGCGTGAGATAGAAACGACGCTCAAACAGGCAYGCCCCCCGGAATACCAGGGGGCGCAATGTGCGTTCAAGAACTCGATGATTCACGATGGCTGCAATTCACACTAGGTATCGCATTTCGCTGCGCTCTTCATCGATGCGAGAACCAAGAGATCCGTTGTTGAAAGTTTTATTCTTATGGATTCTTGACTAGGTTATTCATGTTTAGGGGTTTGTTACGCGCACGCAGTGTGGAAAGTATATCACAGTAATGATCCTTCCGCAGGTTCACCCTACGGA	Pichia aff. terricola		NR_153294.1 Pichia terricola CBS 2617 ITS region; from TYPE material	99.422	346	6.62e-179	344	1	1	1	CGGCGCACAACATAGTTCGCTTCGCCCTCGTTTCTTTTCGGCGGGGCCAAGGCCGGGCCAGCTCCACTTGCGTGAGATAGAAACGACGCTCAAACAGGCAYGCCCCCCGGAATACCAGGGGGCGCAATGTGCGTTCAAGAACTCGATGATTCACGATGGCTGCAATTCACACTAGGTATCGCATTTCGCTGCGCTCTTCATCGATGCGAGAACCAAGAGATCCGTTGTTGAAAGTTTTATTCTTATGGATTCTTGACTAGGTTATTCATGTTTAGGGGTTTGTTACGCGCACGCAGTGTGGAAAGTATATCACAGTAATGATCCTTCCGCAGGTTCACCCTACGGA	CGGCGCACAACATAGTTCGCTTCGCCCTCGTTTCTTTTCGGCGGGGCCAAGGCCGGGCCAGCTCCACTTGCGTGAGATAGAAACGACGCTCAAACAGGCATGCCCCCCGGAATACCAGGGGGCGCAATGTGCGTTCAAGAACTCGATGATTCACGATGGCTGCAATTCACACTAGGTATCGCATTTCGCTGCGCTCTTCATCGATGCGAGAACCAAGAGATCCGTTGTTGAAAGTTTTATTCTTATGGATTCTTGACTAGGTTATTCATGTTTAGGGGTTTGTTACGCGCACGCAGTGTGGAAAGTATATCACAGTAATGATCCTTCCGCAGGTTCACC-TACGGA	Ascomycota	Saccharomycetales	Pichiaceae	Pichia
59	B148	MT988189	NR_153294.1	GAGGTCGAGCTTGATAGCTGGGGTCGGCGCACAACATAGTTCGCTTCGCCCTCGTTTCTTTTCGGCGGGGCCAAGGCCGGGCCAGCTCCACTTGCGTGAGATAGAAACGACGCTCAAACAGGCATGCCCCCCGGAATACCAGGGGGCGCAATGTGCGTTCAAGAACTCGATGATTCACGATGGCTGCAATTCACACTAGGTATCGCATTTCGCTGCGCTCTTCATCGATGCGAGAACCAAGAGATCCGTTGTTGAAAGTTTTATTCTTATGGATTCTTGACTAGGTTATTCATGTTTAGGGGTTTGTTACGCGCACGCAGTGTGGAAAGTATATCACAGTAATGATCCTTCCGCAGGTTCACCTACGGAAACCTTGTTACGACTTTTACTTCC	Pichia aff. terricola		NR_153294.1 Pichia terricola CBS 2617 ITS region; from TYPE material	100	393	0	393	0	0	0	GAGGTCGAGCTTGATAGCTGGGGTCGGCGCACAACATAGTTCGCTTCGCCCTCGTTTCTTTTCGGCGGGGCCAAGGCCGGGCCAGCTCCACTTGCGTGAGATAGAAACGACGCTCAAACAGGCATGCCCCCCGGAATACCAGGGGGCGCAATGTGCGTTCAAGAACTCGATGATTCACGATGGCTGCAATTCACACTAGGTATCGCATTTCGCTGCGCTCTTCATCGATGCGAGAACCAAGAGATCCGTTGTTGAAAGTTTTATTCTTATGGATTCTTGACTAGGTTATTCATGTTTAGGGGTTTGTTACGCGCACGCAGTGTGGAAAGTATATCACAGTAATGATCCTTCCGCAGGTTCACCTACGGAAACCTTGTTACGACTTTTACTTCC	GAGGTCGAGCTTGATAGCTGGGGTCGGCGCACAACATAGTTCGCTTCGCCCTCGTTTCTTTTCGGCGGGGCCAAGGCCGGGCCAGCTCCACTTGCGTGAGATAGAAACGACGCTCAAACAGGCATGCCCCCCGGAATACCAGGGGGCGCAATGTGCGTTCAAGAACTCGATGATTCACGATGGCTGCAATTCACACTAGGTATCGCATTTCGCTGCGCTCTTCATCGATGCGAGAACCAAGAGATCCGTTGTTGAAAGTTTTATTCTTATGGATTCTTGACTAGGTTATTCATGTTTAGGGGTTTGTTACGCGCACGCAGTGTGGAAAGTATATCACAGTAATGATCCTTCCGCAGGTTCACCTACGGAAACCTTGTTACGACTTTTACTTCC	Ascomycota	Saccharomycetales	Pichiaceae	Pichia
60	B149	MT988190	NR_153294.1	GAGGTCGAGCTTGATAGCTGGGGTCGGCGCACAACATAGTTCGCTTCGCCCTCGTTTCTTTTCGGCGGGGCCAAGGCCGGGCCAGCTCCACTTGCGTGAGATAGAAACGACGCTCAAACAGGCATGCCCCCCGGAATACCAGGGGGCGCAATGTGCGTTCAAGAACTCGATGATTCACGATGGCTGCAATTCACACTAGGTATCGCATTTCGCTGCGCTCTTCATCGATGCGAGAACCAAGAGATCCGTTGTTGAAAGTTTTATTCTTATGGATTCTTGACTAGGTTATTCATGTTTAGGGGTTTGTTACGCGCACGCAGTGTGGAAAGTATATCACAGTAATGATCCTTCCGCAGGTTCACCTACGGAAACCTTGTTACGACTTTTACTTCC	Pichia aff. terricola		NR_153294.1 Pichia terricola CBS 2617 ITS region; from TYPE material	100	393	0	393	0	0	0	GAGGTCGAGCTTGATAGCTGGGGTCGGCGCACAACATAGTTCGCTTCGCCCTCGTTTCTTTTCGGCGGGGCCAAGGCCGGGCCAGCTCCACTTGCGTGAGATAGAAACGACGCTCAAACAGGCATGCCCCCCGGAATACCAGGGGGCGCAATGTGCGTTCAAGAACTCGATGATTCACGATGGCTGCAATTCACACTAGGTATCGCATTTCGCTGCGCTCTTCATCGATGCGAGAACCAAGAGATCCGTTGTTGAAAGTTTTATTCTTATGGATTCTTGACTAGGTTATTCATGTTTAGGGGTTTGTTACGCGCACGCAGTGTGGAAAGTATATCACAGTAATGATCCTTCCGCAGGTTCACCTACGGAAACCTTGTTACGACTTTTACTTCC	GAGGTCGAGCTTGATAGCTGGGGTCGGCGCACAACATAGTTCGCTTCGCCCTCGTTTCTTTTCGGCGGGGCCAAGGCCGGGCCAGCTCCACTTGCGTGAGATAGAAACGACGCTCAAACAGGCATGCCCCCCGGAATACCAGGGGGCGCAATGTGCGTTCAAGAACTCGATGATTCACGATGGCTGCAATTCACACTAGGTATCGCATTTCGCTGCGCTCTTCATCGATGCGAGAACCAAGAGATCCGTTGTTGAAAGTTTTATTCTTATGGATTCTTGACTAGGTTATTCATGTTTAGGGGTTTGTTACGCGCACGCAGTGTGGAAAGTATATCACAGTAATGATCCTTCCGCAGGTTCACCTACGGAAACCTTGTTACGACTTTTACTTCC	Ascomycota	Saccharomycetales	Pichiaceae	Pichia
61	B141	MT988191	MN268784.1	CTTAGTTAAAAGTTCGGCGGCCAAAGCGTGCTAAAAATTTAKTTCACTTCGTCCACGACGTTCCATTTCGAAAAAGGCATAGCCTGTTCTCAACTCTGCTTGCGCAAGAAGGAAACGACGCTCAGACAGGCATGCCCCATGGAATACCATGGGGCGCAATGTGCGTTCAAGAACTCGATGATTCACGATGGCTGCAATTCACACTAGGTATCGCATTTCGCTGCGCTCTTCATCGATGCGAGAACCAAGAGATCCGTTGTTGAAAGTTTTGTTTTGTTAAAACTTAGTGACWRKTAKTATTACAATTTTAGGTGTTTGGTGCGCTCACGCATGTGTATAAGATATAAATCACAGTAATGATCCTTCCGCAGGTTCACCTACGGAAACCTTGTTACGACT…	Pichia sp.	lowQ Seq	MN268784.1 Pichia kluyveri strain SM12UFAM small subunit ribosomal RNA gene, partial sequence; internal transcribed spacer 1, 5.8S ribosomal RNA gene, and internal transcribed spacer 2, complete sequence; and large subunit ribosomal RNA gene, partial sequence	98.341	422	0	415	7	0	0	CTTAGTTAAAAGTTCGGCGGCCAAAGCGTGCTAAAAATTTAKTTCACTTCGTCCACGACGTTCCATTTCGAAAAAGGCATAGCCTGTTCTCAACTCTGCTTGCGCAAGAAGGAAACGACGCTCAGACAGGCATGCCCCATGGAATACCATGGGGCGCAATGTGCGTTCAAGAACTCGATGATTCACGATGGCTGCAATTCACACTAGGTATCGCATTTCGCTGCGCTCTTCATCGATGCGAGAACCAAGAGATCCGTTGTTGAAAGTTTTGTTTTGTTAAAACTTAGTGACWRKTAKTATTACAATTTTAGGTGTTTGGTGCGCTCACGCATGTGTATAAGATATAAATCACAGTAATGATCCTTCCGCAGGTTCACCTACGGAAACCTTGTTACGACT…	CTTAGTTAAAAGTTCGGCGGCCAAAGCGTGCTAAAAATTTAGTTCACTTCGTCCACGACGTTCCATTTCGAAAAAGGCATAGCCTGTTCTCAACTCTGCTTGCGCAAGAAGGAAACGACGCTCAGACAGGCATGCCCCATGGAATACCATGGGGCGCAATGTGCGTTCAAGAACTCGATGATTCACGATGGCTGCAATTCACACTAGGTATCGCATTTCGCTGCGCTCTTCATCGATGCGAGAACCAAGAGATCCGTTGTTGAAAGTTTTGTTTTGTTAAAACTTAGTGACTGGTAGTATTACAATTTTAGGTGTTTGGTGCGCTCACGCATGTGTATAAGATATAAATCACAGTAATGATCCTTCCGCAGGTTCACCTACGGAAACCTTGTTACGACT…	Ascomycota	Saccharomycetales	Pichiaceae	Pichia
62	B062	MT988207	KP132262.1	TTGAGGTCAACTTGATGAATATTAAAAGCAACCCTTTGCCTAAGGTACGTTACCATTTCCCTTGTAAAGTAAAACGAATAAATCCATAAATACATCACAGCGAGAACAGCGTCTCCAAAGAAGCTAAGTGTTGAATTAAAAAAGACTGAAACAGTCTCCAATTTCAAGCTAACCCTGAGTATCGCCCACAACCAAAAAATAATAAATTATCTTTTGAGAAGGAAATGACGCTCAAACAGGCATGCCCCTGAGAATGCTCAAGGGCGCAATGTGCGTTCAAAAATTCAATGATTCACGAGTATCTGCAATTCACATTACTTATCGCAATTCGCTACGTTCTTCATCGATGCGAGAACCAAGAGATCCGTTGTTGAAAGTTTTAAATTATTTTAAAATTTC…	Hanseniaspora aff. uvarum		KP132262.1 Hanseniaspora uvarum strain PMM09-2765L isolate ISHAM-ITS_ID MITS1384 18S ribosomal RNA gene, partial sequence; internal transcribed spacer 1, 5.8S ribosomal RNA gene, and internal transcribed spacer 2, complete sequence; and 28S ribosomal RNA gene, partial sequence	99.805	513	0	512	1	0	0	TTGAGGTCAACTTGATGAATATTAAAAGCAACCCTTTGCCTAAGGTACGTTACCATTTCCCTTGTAAAGTAAAACGAATAAATCCATAAATACATCACAGCGAGAACAGCGTCTCCAAAGAAGCTAAGTGTTGAATTAAAAAAGACTGAAACAGTCTCCAATTTCAAGCTAACCCTGAGTATCGCCCACAACCAAAAAATAATAAATTATCTTTTGAGAAGGAAATGACGCTCAAACAGGCATGCCCCTGAGAATGCTCAAGGGCGCAATGTGCGTTCAAAAATTCAATGATTCACGAGTATCTGCAATTCACATTACTTATCGCAATTCGCTACGTTCTTCATCGATGCGAGAACCAAGAGATCCGTTGTTGAAAGTTTTAAATTATTTTAAAATTTC…	TTGAGGTCAACTTGATGAATATTAAAAGCAACCCTTTGCCTAAGGTACGTTACCATTTCCCTTGTAAAGTAAAACGAATAAATCCATAAATACATCACAGCGAGAACAGCGTCTCCAAAGAAGCTAAGTGTTGAATTAAAAAAGACTGAAACAGTCTCCAATTTCAAGCTAACCCTGAGTATCGCCCACAACCAAAAAATAATAAATTATCTTTTGAGAAGGAAATGACGCTCAAACAGGCATGCCCCTGAGAATGCTCAAGGGCGCAATGTGCGTTCAAAAATTCAATGATTCACGAGTATCTGCAATTCACATTACTTATCGCAATTCGCTACGTTCTTCATCGATGCGAGAACCAAGAGATCCGTTGTTGAAAGTTTTAAATTATTTTAAAATTTC…	Ascomycota	Saccharomycetales	Saccharomycodaceae	Hanseniaspora
63	B063	MT988208	MH006565.1	TTGATGAATATTAAAAGCAACCCTTTGCCTAAGGTACGTTACCATTTYCCTTGTAAAGTAAAACGAATAAATCCATAAATACATCACAGCGAGAACAGCGTCTCCAAAGAAGCTAAGTGTTGAATTAAAAAAGACTGAAACAGTCTCCAATTTCAAGCTAACCCTGAGTATCGCCCACAACCAAAAAATAATAAATTATCTTTTGAGAAGGAAATGACGCTCAAACAGGCATGCCCCTGAGAATGCTCAAGGGCGCAATGTGCGTTCAAAAATTCAATGATTCACGAGTATCTGCAATTCACATTACTTATCGCAATTCGCTACGTTCTTCATCGATGCGAGAACCAAGAGATCCGTTGTTGAAAGTTTTAAATTATTTTAAAATTTCCGTTAGGAATT…	Hanseniaspora aff. uvarum		MH006565.1 Hanseniaspora uvarum strain SF1-1 10-2II6 internal transcribed spacer 1, partial sequence; 5.8S ribosomal RNA gene and internal transcribed spacer 2, complete sequence; and large subunit ribosomal RNA gene, partial sequence	99.602	502	0	500	2	0	0	TTGATGAATATTAAAAGCAACCCTTTGCCTAAGGTACGTTACCATTTYCCTTGTAAAGTAAAACGAATAAATCCATAAATACATCACAGCGAGAACAGCGTCTCCAAAGAAGCTAAGTGTTGAATTAAAAAAGACTGAAACAGTCTCCAATTTCAAGCTAACCCTGAGTATCGCCCACAACCAAAAAATAATAAATTATCTTTTGAGAAGGAAATGACGCTCAAACAGGCATGCCCCTGAGAATGCTCAAGGGCGCAATGTGCGTTCAAAAATTCAATGATTCACGAGTATCTGCAATTCACATTACTTATCGCAATTCGCTACGTTCTTCATCGATGCGAGAACCAAGAGATCCGTTGTTGAAAGTTTTAAATTATTTTAAAATTTCCGTTAGGAATT…	TTGATGAATATTAAAAGCAACCCTTTGCCTAAGGTACGTTACCATTTCCCTTGTAAAGTAAAACGAATAAATCCATAAATACATCACAGCGAGAACAGCGTCTCCAAAGAAGCTAAGTGTTGAATTAAAAAAGACTGAAACAGTCTCCAATTTCAAGCTAACCCTGAGTATCGCCCACAACCAAAAAATAATAAATTATCTTTTGAGAAGGAAATGACGCTCAAACAGGCATGCCCCTGAGAATGCTCAAGGGCGCAATGTGCGTTCAAAAATTCAATGATTCACGAGTATCTGCAATTCACATTACTTATCGCAATTCGCTACGTTCTTCATCGATGCGAGAACCAAGAGATCCGTTGTTGAAAGTTTTAAATTATTTTAAAATTTCCGTTAGGAATT…	Ascomycota	Saccharomycetales	Saccharomycodaceae	Hanseniaspora
64	B064	MT988209	KY103550.1	TTGAGGTCAACTTGATGAATATTAAAAGCAACCCTTTGCCTAAGGTACGTTACCATTTCCCTTGTAAAGTAAAACGAATAAATCCATAAATACATCACAGCGAGAACAGCGTCTCCAAAGAAGCTAAGTGTTGAATTAAAAAAGACTGAAACAGTCTCCAATTTCAAGCTAACCCTGAGTATCGCCCACAACCAAAAAATAATAAATTATCTTTTGAGAAGGAAATGACGCTCAAACAGGCATGCCCCTGAGAATGCTCAAGGGCGCAATGTGCGTTCAAAAATTCAATGATTCACGAGTATCTGCAATTCACATTACTTATCGCAATTCGCTACGTTCTTCATCGATGCGAGAACCAAGAGATCCGTTGTTGAAAGTTTTAAATTATTTTAAAATTTC…	Hanseniaspora aff. uvarum		KY103550.1 Hanseniaspora uvarum culture CBS:10325 small subunit ribosomal RNA gene, partial sequence; internal transcribed spacer 1, 5.8S ribosomal RNA gene, and internal transcribed spacer 2, complete sequence; and large subunit ribosomal RNA gene, partial sequence	99.857	699	0	698	1	0	0	TTGAGGTCAACTTGATGAATATTAAAAGCAACCCTTTGCCTAAGGTACGTTACCATTTCCCTTGTAAAGTAAAACGAATAAATCCATAAATACATCACAGCGAGAACAGCGTCTCCAAAGAAGCTAAGTGTTGAATTAAAAAAGACTGAAACAGTCTCCAATTTCAAGCTAACCCTGAGTATCGCCCACAACCAAAAAATAATAAATTATCTTTTGAGAAGGAAATGACGCTCAAACAGGCATGCCCCTGAGAATGCTCAAGGGCGCAATGTGCGTTCAAAAATTCAATGATTCACGAGTATCTGCAATTCACATTACTTATCGCAATTCGCTACGTTCTTCATCGATGCGAGAACCAAGAGATCCGTTGTTGAAAGTTTTAAATTATTTTAAAATTTC…	TTGAGGTCAACTTGATGAATATTAAAAGCAACCCTTTGCCTAAGGTACGTTACCATTTCCCTTGTAAAGTAAAACGAATAAATCCATAAATACATCACAGCGAGAACAGCGTCTCCAAAGAAGCTAAGTGTTGAATTAAAAAAGACTGAAACAGTCTCCAATTTCAAGCTAACCCTGAGTATCGCCCACAACCAAAAAATAATAAATTATCTTTTGAGAAGGAAATGACGCTCAAACAGGCATGCCCCTGAGAATGCTCAAGGGCGCAATGTGCGTTCAAAAATTCAATGATTCACGAGTATCTGCAATTCACATTACTTATCGCAATTCGCTACGTTCTTCATCGATGCGAGAACCAAGAGATCCGTTGTTGAAAGTTTTAAATTATTTTAAAATTTC…	Ascomycota	Saccharomycetales	Saccharomycodaceae	Hanseniaspora
65	B072	MT988210	KP132262.1	TTGAGGTCAACTTGATGAATATTAAAAGCAACCCTTTGCCTAAGGTACGTTACCATTTCCCTTGTAAAGTAAAACGAATAAATCCATAAATACATCACAGCGAGAACAGCGTCTCCAAAGAAGCTAAGTGTTGAATTAAAAAAGACTGAAACAGTCTCCAATTTCAAGCTAACCCTGAGTATCGCCCACAACCAAAAAATAATAAATTATCTTTTGAGAAGGAAATGACGCTCAAACAGGCATGCCCCTGAGAATGCTCAAGGGCGCAATGTGCGTTCAAAAATTCAATGATTCACGAGTATCTGCAATTCACATTACTTATCGCAATTCGCTACGTTCTTCATCGATGCGAGAACCAAGAGATCCGTTGTTGAAAGTTTTAAATTATTTTAAAATTTC…	Hanseniaspora aff. uvarum		KP132262.1 Hanseniaspora uvarum strain PMM09-2765L isolate ISHAM-ITS_ID MITS1384 18S ribosomal RNA gene, partial sequence; internal transcribed spacer 1, 5.8S ribosomal RNA gene, and internal transcribed spacer 2, complete sequence; and 28S ribosomal RNA gene, partial sequence	100	513	0	513	0	0	0	TTGAGGTCAACTTGATGAATATTAAAAGCAACCCTTTGCCTAAGGTACGTTACCATTTCCCTTGTAAAGTAAAACGAATAAATCCATAAATACATCACAGCGAGAACAGCGTCTCCAAAGAAGCTAAGTGTTGAATTAAAAAAGACTGAAACAGTCTCCAATTTCAAGCTAACCCTGAGTATCGCCCACAACCAAAAAATAATAAATTATCTTTTGAGAAGGAAATGACGCTCAAACAGGCATGCCCCTGAGAATGCTCAAGGGCGCAATGTGCGTTCAAAAATTCAATGATTCACGAGTATCTGCAATTCACATTACTTATCGCAATTCGCTACGTTCTTCATCGATGCGAGAACCAAGAGATCCGTTGTTGAAAGTTTTAAATTATTTTAAAATTTC…	TTGAGGTCAACTTGATGAATATTAAAAGCAACCCTTTGCCTAAGGTACGTTACCATTTCCCTTGTAAAGTAAAACGAATAAATCCATAAATACATCACAGCGAGAACAGCGTCTCCAAAGAAGCTAAGTGTTGAATTAAAAAAGACTGAAACAGTCTCCAATTTCAAGCTAACCCTGAGTATCGCCCACAACCAAAAAATAATAAATTATCTTTTGAGAAGGAAATGACGCTCAAACAGGCATGCCCCTGAGAATGCTCAAGGGCGCAATGTGCGTTCAAAAATTCAATGATTCACGAGTATCTGCAATTCACATTACTTATCGCAATTCGCTACGTTCTTCATCGATGCGAGAACCAAGAGATCCGTTGTTGAAAGTTTTAAATTATTTTAAAATTTC…	Ascomycota	Saccharomycetales	Saccharomycodaceae	Hanseniaspora
66	B074	MT988211	MH006565.1	TTGAGGTCAAACTTGATGAATATTAAAAGCAACCCTTTGCCTAAGGTACGTTACCATTTCCCTTGTAAAGTAAAACGAATAAATCCATAAATACATCACAGCGAGAACAGCGTCTCCAAAGAAGCTAAGTGTTGAATTAAAAAAGACTGAAACAGTCTCCAATTTCAAGCTAACCCTGAGTATCGCCCACAACCAAAAAATAATAAATTATCTTTTGAGAAGGAAATGACGCTCAAACAGGCATGCCCCTGAGAATGCTCAAGGGCGCAATGTGCGTTCAAAAATTCAATGATTCACGAGTATCTGCAATTCACATTACTTATCGCAATTCGCTACGTTCTTCATCGATGCGAGAACCAAGAGATCCGTTGTTGAAAGTTTTAAATTATTTTAAAATTT…	Hanseniaspora aff. uvarum		MH006565.1 Hanseniaspora uvarum strain SF1-1 10-2II6 internal transcribed spacer 1, partial sequence; 5.8S ribosomal RNA gene and internal transcribed spacer 2, complete sequence; and large subunit ribosomal RNA gene, partial sequence	100	514	0	514	0	0	0	TTGAGGTCAAACTTGATGAATATTAAAAGCAACCCTTTGCCTAAGGTACGTTACCATTTCCCTTGTAAAGTAAAACGAATAAATCCATAAATACATCACAGCGAGAACAGCGTCTCCAAAGAAGCTAAGTGTTGAATTAAAAAAGACTGAAACAGTCTCCAATTTCAAGCTAACCCTGAGTATCGCCCACAACCAAAAAATAATAAATTATCTTTTGAGAAGGAAATGACGCTCAAACAGGCATGCCCCTGAGAATGCTCAAGGGCGCAATGTGCGTTCAAAAATTCAATGATTCACGAGTATCTGCAATTCACATTACTTATCGCAATTCGCTACGTTCTTCATCGATGCGAGAACCAAGAGATCCGTTGTTGAAAGTTTTAAATTATTTTAAAATTT…	TTGAGGTCAAACTTGATGAATATTAAAAGCAACCCTTTGCCTAAGGTACGTTACCATTTCCCTTGTAAAGTAAAACGAATAAATCCATAAATACATCACAGCGAGAACAGCGTCTCCAAAGAAGCTAAGTGTTGAATTAAAAAAGACTGAAACAGTCTCCAATTTCAAGCTAACCCTGAGTATCGCCCACAACCAAAAAATAATAAATTATCTTTTGAGAAGGAAATGACGCTCAAACAGGCATGCCCCTGAGAATGCTCAAGGGCGCAATGTGCGTTCAAAAATTCAATGATTCACGAGTATCTGCAATTCACATTACTTATCGCAATTCGCTACGTTCTTCATCGATGCGAGAACCAAGAGATCCGTTGTTGAAAGTTTTAAATTATTTTAAAATTT…	Ascomycota	Saccharomycetales	Saccharomycodaceae	Hanseniaspora
67	B076	MT988212	MH594218.1	TTGAGGTCAACTTGATGAATATTAAAAGCAACCCTTTGCCTAAGGTACGTTACCATTTCCCTTGTAAAGTAAAACGAATAAATCCATAAATACATCACAGCGAGAACAGCGTCTCCAAAGAAGCTAAGTGTTGAATTAAAAAAGACTGAAACAGTCTCCAATTTCAAGCTAACCCTGAGTATCGCCCACAACCAAAAAATAATAAATTATCTTTTGAGAAGGAAATGACGCTCAAACAGGCATGCCCCTGAGAATGCTCAAGGGCGCAATGTGCGTTCAAAAATTCAATGATTCACGAGTATCTGCAATTCACATTACTTATCGCAATTCGCTACGTTCTTCATCGATGCGAGAACCAAGAGATCCGTTGTTGAAAGTTTTAAATTATTTTAAAATTTC…	Hanseniaspora aff. uvarum		MH594218.1 Hanseniaspora uvarum isolate GK-9 small subunit ribosomal RNA gene, partial sequence; internal transcribed spacer 1, 5.8S ribosomal RNA gene, and internal transcribed spacer 2, complete sequence; and large subunit ribosomal RNA gene, partial sequence	99.707	682	0	680	2	0	0	TTGAGGTCAACTTGATGAATATTAAAAGCAACCCTTTGCCTAAGGTACGTTACCATTTCCCTTGTAAAGTAAAACGAATAAATCCATAAATACATCACAGCGAGAACAGCGTCTCCAAAGAAGCTAAGTGTTGAATTAAAAAAGACTGAAACAGTCTCCAATTTCAAGCTAACCCTGAGTATCGCCCACAACCAAAAAATAATAAATTATCTTTTGAGAAGGAAATGACGCTCAAACAGGCATGCCCCTGAGAATGCTCAAGGGCGCAATGTGCGTTCAAAAATTCAATGATTCACGAGTATCTGCAATTCACATTACTTATCGCAATTCGCTACGTTCTTCATCGATGCGAGAACCAAGAGATCCGTTGTTGAAAGTTTTAAATTATTTTAAAATTTC…	TTGAGGTCAACTTGATGAATATTAAAAGCAACCCTTTGCCTAAGGTACGTTACCATTTCCCTTGTAAAGTAAAACGAATAAATCCATAAATACATCACAGCGAGAACAGCGTCTCCAAAGAAGCTAAGTGTTGAATTAAAAAAGACTGAAACAGTCTCCAATTTCAAGCTAACCCTGAGTATCGCCCACAACCAAAAAATAATAAATTATCTTTTGAGAAGGAAATGACGCTCAAACAGGCATGCCCCTGAGAATGCTCAAGGGCGCAATGTGCGTTCAAAAATTCAATGATTCACGAGTATCTGCAATTCACATTACTTATCGCAATTCGCTACGTTCTTCATCGATGCGAGAACCAAGAGATCCGTTGTTGAAAGTTTTAAATTATTTTAAAATTTC…	Ascomycota	Saccharomycetales	Saccharomycodaceae	Hanseniaspora
68	B078	MT988213	KY103552.1	TTGAGGTCAACTTGATGAATATTAAAAGCAACCCTTTGCCTAAGGTACGTTACCATTTCCCTTGTAAAGTAAAACGAATAAATCCATAAATACATCACAGCGAGAACAGCGTCTCCAAAGAAGCTAAGTGTTGAATTAAAAAAGACTGAAACAGTCTCCAATTTCAAGCTAACCCTGAGTATCGCCCACAACCAAAAAATAATAAATTATCTTTTGAGAAGGAAATGACGCTCAAACAGGCATGCCCCTGAGAATGCTCAAGGGCGCAATGTGCGTTCAAAAATTCAATGATTCACGAGTATCTGCAATTCACATTACTTATCGCAATTCGCTACGTTCTTCATCGATGCGAGAACCAAGAGATCCGTTGTTGAAAGTTTTAAATTATTTTAAAATTTC…	Hanseniaspora aff. uvarum		KY103552.1 Hanseniaspora uvarum culture CBS:2588 small subunit ribosomal RNA gene, partial sequence; internal transcribed spacer 1, 5.8S ribosomal RNA gene, and internal transcribed spacer 2, complete sequence; and large subunit ribosomal RNA gene, partial sequence	99.713	698	0	696	2	0	0	TTGAGGTCAACTTGATGAATATTAAAAGCAACCCTTTGCCTAAGGTACGTTACCATTTCCCTTGTAAAGTAAAACGAATAAATCCATAAATACATCACAGCGAGAACAGCGTCTCCAAAGAAGCTAAGTGTTGAATTAAAAAAGACTGAAACAGTCTCCAATTTCAAGCTAACCCTGAGTATCGCCCACAACCAAAAAATAATAAATTATCTTTTGAGAAGGAAATGACGCTCAAACAGGCATGCCCCTGAGAATGCTCAAGGGCGCAATGTGCGTTCAAAAATTCAATGATTCACGAGTATCTGCAATTCACATTACTTATCGCAATTCGCTACGTTCTTCATCGATGCGAGAACCAAGAGATCCGTTGTTGAAAGTTTTAAATTATTTTAAAATTTC…	TTGAGGTCAACTTGATGAATATTAAAAGCAACCCTTTGCCTAAGGTACGTTACCATTTCCCTTGTAAAGTAAAACGAATAAATCCATAAATACATCACAGCGAGAACAGCGTCTCCAAAGAAGCTAAGTGTTGAATTAAAAAAGACTGAAACAGTCTCCAATTTCAAGCTAACCCTGAGTATCGCCCACAACCAAAAAATAATAAATTATCTTTTGAGAAGGAAATGACGCTCAAACAGGCATGCCCCTGAGAATGCTCAAGGGCGCAATGTGCGTTCAAAAATTCAATGATTCACGAGTATCTGCAATTCACATTACTTATCGCAATTCGCTACGTTCTTCATCGATGCGAGAACCAAGAGATCCGTTGTTGAAAGTTTTAAATTATTTTAAAATTTC…	Ascomycota	Saccharomycetales	Saccharomycodaceae	Hanseniaspora
69	B079		KT802750.1	TTGAGGTCAACTTGATGAATATTAAAAGCAACCCTTTGCCTAAGGTACGTTACCATTTCCCTTGTAAAGTAAAACGAATAAATCCATAAATACATCACAGCGAGAACAGCGTCTCCAAAGAAGCTAAGTGTTGAATTAAAAAAGACTGAAACAGTCTCCAATTTCAAGCTAACCCTGAGTATCGCCCACAACCAAAAAATAATAAATTATCTTTTGAGAAGGAAATGACGCTCAAACAGGCATGCCCCTGAGAATGCTCAAGGGCGCAATGTGCGTTCAAAAATTCAATGATTCACGAGTATCTGCAATTCACATTACTTATCGCAATTCGCTACGTTCTTCATCGATGCGAGAACCAAGAGATCCGTTGTTGAAAGTTTTAAATTATTTTAAAATTTC…	Hanseniaspora aff. uvarum	WGS sequencing data this publication	KT802750.1 Hanseniaspora uvarum strain T8 internal transcribed spacer 1, partial sequence; 5.8S ribosomal RNA gene, complete sequence; and internal transcribed spacer 2, partial sequence	100	517	0	517	0	0	0	TTGAGGTCAACTTGATGAATATTAAAAGCAACCCTTTGCCTAAGGTACGTTACCATTTCCCTTGTAAAGTAAAACGAATAAATCCATAAATACATCACAGCGAGAACAGCGTCTCCAAAGAAGCTAAGTGTTGAATTAAAAAAGACTGAAACAGTCTCCAATTTCAAGCTAACCCTGAGTATCGCCCACAACCAAAAAATAATAAATTATCTTTTGAGAAGGAAATGACGCTCAAACAGGCATGCCCCTGAGAATGCTCAAGGGCGCAATGTGCGTTCAAAAATTCAATGATTCACGAGTATCTGCAATTCACATTACTTATCGCAATTCGCTACGTTCTTCATCGATGCGAGAACCAAGAGATCCGTTGTTGAAAGTTTTAAATTATTTTAAAATTTC…	TTGAGGTCAACTTGATGAATATTAAAAGCAACCCTTTGCCTAAGGTACGTTACCATTTCCCTTGTAAAGTAAAACGAATAAATCCATAAATACATCACAGCGAGAACAGCGTCTCCAAAGAAGCTAAGTGTTGAATTAAAAAAGACTGAAACAGTCTCCAATTTCAAGCTAACCCTGAGTATCGCCCACAACCAAAAAATAATAAATTATCTTTTGAGAAGGAAATGACGCTCAAACAGGCATGCCCCTGAGAATGCTCAAGGGCGCAATGTGCGTTCAAAAATTCAATGATTCACGAGTATCTGCAATTCACATTACTTATCGCAATTCGCTACGTTCTTCATCGATGCGAGAACCAAGAGATCCGTTGTTGAAAGTTTTAAATTATTTTAAAATTTC…	Ascomycota	Saccharomycetales	Saccharomycodaceae	Hanseniaspora
70	B082	MT988214	KY103552.1	TTGAGGTCAACTTGATGAATATTAAAAGCAACCCTTTGCCTAAGGTACGTTACCATTTCCCTTGTAAAGTAAAACGAATAAATCCATAAATACATCACAGCGAGAACAGCGTCTCCAAAGAAGCTAAGTGTTGAATTAAAAAAGACTGAAACAGTCTCCAATTTCAAGCTAACCCTGAGTATCGCCCACAACCAAAAAATAATAAATTATCTTTTGAGAAGGAAATGACGCTCAAACAGGCATGCCCCTGAGAATGCTCAAGGGCGCAATGTGCGTTCAAAAATTCAATGATTCACGAGTATCTGCAATTCACATTACTTATCGCAATTCGCTACGTTCTTCATCGATGCGAGAACCAAGAGATCCGTTGTTGAAAGTTTTAAATTATTTTAAAATTTC…	Hanseniaspora aff. uvarum		KY103552.1 Hanseniaspora uvarum culture CBS:2588 small subunit ribosomal RNA gene, partial sequence; internal transcribed spacer 1, 5.8S ribosomal RNA gene, and internal transcribed spacer 2, complete sequence; and large subunit ribosomal RNA gene, partial sequence	99.713	698	0	696	2	0	0	TTGAGGTCAACTTGATGAATATTAAAAGCAACCCTTTGCCTAAGGTACGTTACCATTTCCCTTGTAAAGTAAAACGAATAAATCCATAAATACATCACAGCGAGAACAGCGTCTCCAAAGAAGCTAAGTGTTGAATTAAAAAAGACTGAAACAGTCTCCAATTTCAAGCTAACCCTGAGTATCGCCCACAACCAAAAAATAATAAATTATCTTTTGAGAAGGAAATGACGCTCAAACAGGCATGCCCCTGAGAATGCTCAAGGGCGCAATGTGCGTTCAAAAATTCAATGATTCACGAGTATCTGCAATTCACATTACTTATCGCAATTCGCTACGTTCTTCATCGATGCGAGAACCAAGAGATCCGTTGTTGAAAGTTTTAAATTATTTTAAAATTTC…	TTGAGGTCAACTTGATGAATATTAAAAGCAACCCTTTGCCTAAGGTACGTTACCATTTCCCTTGTAAAGTAAAACGAATAAATCCATAAATACATCACAGCGAGAACAGCGTCTCCAAAGAAGCTAAGTGTTGAATTAAAAAAGACTGAAACAGTCTCCAATTTCAAGCTAACCCTGAGTATCGCCCACAACCAAAAAATAATAAATTATCTTTTGAGAAGGAAATGACGCTCAAACAGGCATGCCCCTGAGAATGCTCAAGGGCGCAATGTGCGTTCAAAAATTCAATGATTCACGAGTATCTGCAATTCACATTACTTATCGCAATTCGCTACGTTCTTCATCGATGCGAGAACCAAGAGATCCGTTGTTGAAAGTTTTAAATTATTTTAAAATTTC…	Ascomycota	Saccharomycetales	Saccharomycodaceae	Hanseniaspora
71	B085	MT988215	KT802750.1	TTGAGGTCAACTTGATGAATATTAAAAGCAACCCTTTGCCTAAGGTACGTTACCATTTCCCTTGTAAAGTAAAACGAATAAATCCATAAATACATCACAGCGAGAACAGCGTCTCCAAAGAAGCTAAGTGTTGAATTAAAAAAGACTGAAACAGTCTCCAATTTCAAGCTAACCCTGAGTATCGCCCACAACCAAAAAATAATAAATTATCTTTTGAGAAGGAAATGACGCTCAAACAGGCATGCCCCTGAGAATGCTCAAGGGCGCAATGTGCGTTCAAAAATTCAATGATTCACGAGTATCTGCAATTCACATTACTTATCGCAATTCGCTACGTTCTTCATCGATGCGAGAACCAAGAGATCCGTTGTTGAAAGTTTTAAATTATTTTAAAATTTC…	Hanseniaspora aff. uvarum		KT802750.1 Hanseniaspora uvarum strain T8 internal transcribed spacer 1, partial sequence; 5.8S ribosomal RNA gene, complete sequence; and internal transcribed spacer 2, partial sequence	100	517	0	517	0	0	0	TTGAGGTCAACTTGATGAATATTAAAAGCAACCCTTTGCCTAAGGTACGTTACCATTTCCCTTGTAAAGTAAAACGAATAAATCCATAAATACATCACAGCGAGAACAGCGTCTCCAAAGAAGCTAAGTGTTGAATTAAAAAAGACTGAAACAGTCTCCAATTTCAAGCTAACCCTGAGTATCGCCCACAACCAAAAAATAATAAATTATCTTTTGAGAAGGAAATGACGCTCAAACAGGCATGCCCCTGAGAATGCTCAAGGGCGCAATGTGCGTTCAAAAATTCAATGATTCACGAGTATCTGCAATTCACATTACTTATCGCAATTCGCTACGTTCTTCATCGATGCGAGAACCAAGAGATCCGTTGTTGAAAGTTTTAAATTATTTTAAAATTTC…	TTGAGGTCAACTTGATGAATATTAAAAGCAACCCTTTGCCTAAGGTACGTTACCATTTCCCTTGTAAAGTAAAACGAATAAATCCATAAATACATCACAGCGAGAACAGCGTCTCCAAAGAAGCTAAGTGTTGAATTAAAAAAGACTGAAACAGTCTCCAATTTCAAGCTAACCCTGAGTATCGCCCACAACCAAAAAATAATAAATTATCTTTTGAGAAGGAAATGACGCTCAAACAGGCATGCCCCTGAGAATGCTCAAGGGCGCAATGTGCGTTCAAAAATTCAATGATTCACGAGTATCTGCAATTCACATTACTTATCGCAATTCGCTACGTTCTTCATCGATGCGAGAACCAAGAGATCCGTTGTTGAAAGTTTTAAATTATTTTAAAATTTC…	Ascomycota	Saccharomycetales	Saccharomycodaceae	Hanseniaspora
72	B174	MT988216	AJ318412.1	AAAAGCAACCCTTTGCCTAAGGTACGTTACCATTTCCCTTGTAAAGTAAAACGAATAAATCCATAAATACATCACAGCGAGAACAGCGTCTCCAAAGAAGCTAAGTGTTGAATTAAAAAAGACTGAAACAGTCTCCAATTTCAAGCTAACCCTGAGTATCGCCCACAACCAAAAAATAATAAATTATCTTTTGAGAAGGAAATGACGCTCAAACAGGCATGCCCCTGAGAATGCTCAAGGGCGCAATGTGCGTTCAAAAATTCAATGATTCACGAGTATCTGCAATTCACATTACTTATCGCAATTCGCTACGTTCTTCATCGATGCGAGAACCAAGAGATCCGTTGTTGAAAGTTTTAAATTATTTTAAAATTTCCGTTAGGAATTTTGGTTTAGTTT…	Hanseniaspora aff. uvarum		AJ318412.1 Hanseniaspora uvarum 5.8S rRNA gene, and ITS 1 and 2, strain 276	100	491	0	491	0	0	0	AAAAGCAACCCTTTGCCTAAGGTACGTTACCATTTCCCTTGTAAAGTAAAACGAATAAATCCATAAATACATCACAGCGAGAACAGCGTCTCCAAAGAAGCTAAGTGTTGAATTAAAAAAGACTGAAACAGTCTCCAATTTCAAGCTAACCCTGAGTATCGCCCACAACCAAAAAATAATAAATTATCTTTTGAGAAGGAAATGACGCTCAAACAGGCATGCCCCTGAGAATGCTCAAGGGCGCAATGTGCGTTCAAAAATTCAATGATTCACGAGTATCTGCAATTCACATTACTTATCGCAATTCGCTACGTTCTTCATCGATGCGAGAACCAAGAGATCCGTTGTTGAAAGTTTTAAATTATTTTAAAATTTCCGTTAGGAATTTTGGTTTAGTTT…	AAAAGCAACCCTTTGCCTAAGGTACGTTACCATTTCCCTTGTAAAGTAAAACGAATAAATCCATAAATACATCACAGCGAGAACAGCGTCTCCAAAGAAGCTAAGTGTTGAATTAAAAAAGACTGAAACAGTCTCCAATTTCAAGCTAACCCTGAGTATCGCCCACAACCAAAAAATAATAAATTATCTTTTGAGAAGGAAATGACGCTCAAACAGGCATGCCCCTGAGAATGCTCAAGGGCGCAATGTGCGTTCAAAAATTCAATGATTCACGAGTATCTGCAATTCACATTACTTATCGCAATTCGCTACGTTCTTCATCGATGCGAGAACCAAGAGATCCGTTGTTGAAAGTTTTAAATTATTTTAAAATTTCCGTTAGGAATTTTGGTTTAGTTT…	Ascomycota	Saccharomycetales	Saccharomycodaceae	Hanseniaspora
73	B193	MT988217	MH006565.1	TTGATGAATATTAAAAGCAACCCTTTGCCTAAGGTACGTTACCATTTCCCTTGTAAAGTAAAACGAATAAATCCATAAATACATCACAGCGAGAACAGCGTCTCCAAAGAAGCTAAGTGTTGAATTAAAAAAGACTGAAACAGTCTCCAATTTCAAGCTAACCCTGAGTATCGCCCACAACCAAAAAATAATAAATTATCTTTTGAGAAGGAAATGACGCTCAAACAGGCATGCCCCTGAGAATGCTCAAGGGCGCAATGTGCGTTCAAAAATTCAATGATTCACGAGTATCTGCAATTCACATTACTTATCGCAATTCGCTACGTTCTTCATCGATGCGAGAACCAAGAGATCCGTTGTTGAAAGTTTTAAATTATTTTAAAATTTCCGTTAGGAATT…	Hanseniaspora aff. uvarum		MH006565.1 Hanseniaspora uvarum strain SF1-1 10-2II6 internal transcribed spacer 1, partial sequence; 5.8S ribosomal RNA gene and internal transcribed spacer 2, complete sequence; and large subunit ribosomal RNA gene, partial sequence	100	502	0	502	0	0	0	TTGATGAATATTAAAAGCAACCCTTTGCCTAAGGTACGTTACCATTTCCCTTGTAAAGTAAAACGAATAAATCCATAAATACATCACAGCGAGAACAGCGTCTCCAAAGAAGCTAAGTGTTGAATTAAAAAAGACTGAAACAGTCTCCAATTTCAAGCTAACCCTGAGTATCGCCCACAACCAAAAAATAATAAATTATCTTTTGAGAAGGAAATGACGCTCAAACAGGCATGCCCCTGAGAATGCTCAAGGGCGCAATGTGCGTTCAAAAATTCAATGATTCACGAGTATCTGCAATTCACATTACTTATCGCAATTCGCTACGTTCTTCATCGATGCGAGAACCAAGAGATCCGTTGTTGAAAGTTTTAAATTATTTTAAAATTTCCGTTAGGAATT…	TTGATGAATATTAAAAGCAACCCTTTGCCTAAGGTACGTTACCATTTCCCTTGTAAAGTAAAACGAATAAATCCATAAATACATCACAGCGAGAACAGCGTCTCCAAAGAAGCTAAGTGTTGAATTAAAAAAGACTGAAACAGTCTCCAATTTCAAGCTAACCCTGAGTATCGCCCACAACCAAAAAATAATAAATTATCTTTTGAGAAGGAAATGACGCTCAAACAGGCATGCCCCTGAGAATGCTCAAGGGCGCAATGTGCGTTCAAAAATTCAATGATTCACGAGTATCTGCAATTCACATTACTTATCGCAATTCGCTACGTTCTTCATCGATGCGAGAACCAAGAGATCCGTTGTTGAAAGTTTTAAATTATTTTAAAATTTCCGTTAGGAATT…	Ascomycota	Saccharomycetales	Saccharomycodaceae	Hanseniaspora
74	B083	MT988218	KC254055.1	GCATGCCCCTGAGAATGCTCAAGGGCGCAGTGTGCGTTCAAAAATGTGTGATTCTATTCTATCTGCAATTCACATTAGTTATCGCAATGAAGTACGTTCTTCATCGATGCGAGAACCAAGAGATCCGTTGTTGAAAGTTTTAAATTATTTTAAAATTTCCGTTAGGAATTTTGGTTTAGTTTAAAAAATTATAATAAAATAAAATTGTTTGTGTTTGTTTTTTGCCTTGAACCTTTCGATTCAAAGCAGAAAGAATTAAATTAAAGTAAAAAACTCCAATGTGTGTAGCGTTGACTGAGATTCAAGCAAGACTACTTTTACTGCGACACTCTAAAGAAGCAGCGCAATTAAGCGCACATCTTCAATAAAGATACACATTATTGTAAAAGATCTAAACAA…	Hanseniaspora sp.	lowQ Seq	KC254055.1 Hanseniaspora uvarum strain UOA/HCPF 8187 isolate ISHAM-ITS_ID MITS1385 18S ribosomal RNA gene, partial sequence; internal transcribed spacer 1, 5.8S ribosomal RNA gene, and internal transcribed spacer 2, complete sequence; and 26S ribosomal RNA gene, partial sequence	96.514	459	0	443	15	1	1	GCATGCCCCTGAGAATGCTCAAGGGCGCAGTGTGCGTTCAAAAAT-GTGTGATTCTATTCTATCTGCAATTCACATTAGTTATCGCAATGAAGTACGTTCTTCATCGATGCGAGAACCAAGAGATCCGTTGTTGAAAGTTTTAAATTATTTTAAAATTTCCGTTAGGAATTTTGGTTTAGTTTAAAAAATTATAATAAAATAAAATTGTTTGTGTTTGTTTTTTGCCTTGAACCTTTCGATTCAAAGCAGAAAGAATTAAATTAAAGTAAAAAACTCCAATGTGTGTAGCGTTGACTGAGATTCAAGCAAGACTACTTTTACTGCGACACTCTAAAGAAGCAGCGCAATTAAGCGCACATCTTCAATAAAGATACACATTATTGTAAAAGATCTAAACA…	GCATGCCCCTGAGAATGCTCAAGGGCGCAATGTGCGTTCAAAAATTCAATGATTCACGAGTATCTGCAATTCACATTACTTATCGCAATTCGCTACGTTCTTCATCGATGCGAGAACCAAGAGATCCGTTGTTGAAAGTTTTAAATTATTTTAAAATTTCCGTTAGGAATTTTGGTTTAGTTTAAAAAATTATAATAAAATAAAATTGTTTGTGTTTGTTTTTTGCCTTGAACCTTTCGATTCAAAGCAGAAAGAATTAAATTAAAGTAAAAAACTCCAATGTGTGTAGCGTTGACTGAGATTCAAGCAAGACTACTTCTACTGCGACACTCTAAAGAAGCAGCGCAATTAAGCGCACATCTTCAATAAAGATACACATTATTGTAAAAGATCTAAACA…	Ascomycota	Saccharomycetales	Saccharomycodaceae	Hanseniaspora
75	B110	MT988219	KT029777.1	TTTGAACGCACATTGCGCCCTTGACCATTCTCAGGGGCATGCCTGTTTGAGCGTCATTTCCTTCTCAAAAGATAATTTATTATTTTTTGGTTGTGGGCGATACTCAGGGTTAGCTTGAAATTGGAGACTGTTTCAGTCTTTTTTAATTCAACACTTAGCTTCTTTGGAGACGCTGTTCTCGCTGTGATGTATTTATGGATTTATTCGTTTTACTTTACAAGGGAAATGGTAACATACCTTAAGCAAAGGGTTGCTTTTAATATTCATCAAATTTGACCTCAAATCAAGTAGGATTACCCCGCTGAACTTTTCCATCATCCATAAGCGGA	Hanseniaspora sp.	lowQ Seq	KT029777.1 Hanseniaspora uvarum strain UniFGHV8 18S ribosomal RNA gene, partial sequence; internal transcribed spacer 1, 5.8S ribosomal RNA gene, and internal transcribed spacer 2, complete sequence; and 28S ribosomal RNA gene, partial sequence	96.96	329	3.2e-155	319	8	2	2	TTTGAACGCACATTGCGCCCTTGACCATTCTCAGGGGCATGCCTGTTTGAGCGTCATTTCCTTCTCAAAAGATAATTTATTATTTTTTGGTTGTGGGCGATACTCAGGGTTAGCTTGAAATTGGAGACTGTTTCAGTCTTTTTTAATTCAACACTTAGCTTCTTTGGAGACGCTGTTCTCGCTGTGATGTATTTATGGATTTATTCGTTTTACTTTACAAGGGAAATGGTAACATACCTTAAGCAAAGGGTTGCTTTTAATATTCATCAAATTTGACCTCAAATCAAGTAGGATTACCCCGCTGAACTTTTCCATCATCCATAAGCGGA	TTTGAACGCACATTGCGCCCTTGAGCATTCTCAGGGGCATGCCTGTTTGAGCGTCATTTCCTTCTCAAAAGATAATTTATTATTTTTTGGTTGTGGGCGATACTCAGGGTTAGCTTGAAATTGGAGACTGTTTCAGTCTTTTTTAATTCAACACTTAGCTTCTTTGGAGACGCTGTTCTCGCTGTGATGTATTTATGGATTTATTCGTTTTACTTTACAAGGGAAATGGTAACGTACCTTAGGCAAAGGGTTGCTTTTAATATTCATCAAGTTTGACCTCAAATCAAGTAGGATTA-CCCGCTGAACTTAAGCAT-ATCAATAAGCGGA	Ascomycota	Saccharomycetales	Saccharomycodaceae	Hanseniaspora
76	B160	MT988220	AM160628.1	ATCTCACTCAACGCGCCGGCATTGGAGTTTTTTTACTTTACTTCAATTCTCTCTGCTTTAAATCGAAAGGTTCACGGCAAAAAACAAACCCAAACCATTTTATTTTATTATAATTTTTTAAACTAATCCAAAATTTCAAGAGGAAATTTTAAAATAATTTAAAACTTGGAGGGGAGGATCTCTTGGTTCTTACATCGATGAAAAACGTAGCGAATTGCCCTCACTAATGTGAATTGCAGATACTCATGAATCATTGAATTTTTGAACGAACATTGCGCCCTTGAGCATTCTCAGGGGCATGCCTGTTTGAGCGTCATTTCCTTCTCAAAAGATAATTTATTATTTTTTGGTTGTGGGCGATACTCAGGGTTAGCTTGAAATTGGAGACTGTTTCAGTCT…	Hanseniaspora sp.	lowQ Seq	AM160628.1 Hanseniaspora uvarum ITS1, 5.8S rRNA gene, ITS2 and 26S rRNA gene, strain HA 1670	94.276	594	0	560	33	1	1	ATCTCACTCAACGC-GCCGGCATTGGAGTTTTTTTACTTTACTTCAATTCTCTCTGCTTTAAATCGAAAGGTTCACGGCAAAAAACAAACCCAAACCATTTTATTTTATTATAATTTTTTAAACTAATCCAAAATTTCAAGAGGAAATTTTAAAATAATTTAAAACTTGGAGGGGAGGATCTCTTGGTTCTTACATCGATGAAAAACGTAGCGAATTGCCCTCACTAATGTGAATTGCAGATACTCATGAATCATTGAATTTTTGAACGAACATTGCGCCCTTGAGCATTCTCAGGGGCATGCCTGTTTGAGCGTCATTTCCTTCTCAAAAGATAATTTATTATTTTTTGGTTGTGGGCGATACTCAGGGTTAGCTTGAAATTGGAGACTGTTTCAGTC…	ATCTCAGTCAACGCTACACACATTGGAGTTTTTTTACTTTAATTTAATTCTTTCTGCTTTGAATCGAAAGGTTCAAGGCAAAAAACAAACACAAACAATTTTATTTTATTATAATTTTTTAAACTAAACCAAAATTCCTAACGGAAATTTTAAAATAATTTAAAACTTTCAACAACGGATCTCTTGGTTCTCGCATCGATGAAGAACGTAGCGAATTGCGATAAGTAATGTGAATTGCAGATACTCGTGAATCATTGAATTTTTGAACGCACATTGCGCCCTTGAGCATTCTCAGGGGCATGCCTGTTTGAGCGTCATTTCCTTCTCAAAAGATAATTTATTATTTTTTGGTTGTGGGCGATACTCAGGGTTAGCTTGAAATTGGAGACTGTTTCAGTC…	Ascomycota	Saccharomycetales	Saccharomycodaceae	Hanseniaspora
77	B200	MT988224	KF057519.1	GTTTTGATTTAACTCTACTACGCCCGAAGTTGGAGAAACCCCGCCGAGGTCTTCGAGGCACGCCCGCCTTTCGACGGACGATGCCCAATACCAAGCGGTGCTTGAGTGGTGTAATGACGCTCGAACAGGCATGCCCCTCGGAATACCAAGGGGCGCAATGTGCGTTCAAAGATTCGATGATTCACTGAATTCTGCAATTCACATTACTTATCGCATTTCGCTGCGTTCTTCATCGATGCGAGAACCAAGAGATCCGTTGTTGAAAGTTTTAATTTAATTAAAATTTTATACTCAGACGACTGGTTTAAAACAAGAGTTTGGTTAGACTCTGGCGGGCGCTCGCCTGTCCGGAGACTGGCGCGCTCGGGAGAACCTTCGCGGTCCCGCCAAAGCAACGAA…	Tumularia aff. aquatica		KF057519.1 Tumularia aquatica strain LL11_021 18S ribosomal RNA gene, partial sequence; internal transcribed spacer 1 and 5.8S ribosomal RNA gene, complete sequence; and internal transcribed spacer 2, partial sequence	99.578	474	0	472	2	0	0	GTTTTGATTTAACTCTACTACGCCCGAAGTTGGAGAAACCCCGCCGAGGTCTTCGAGGCACGCCCGCCTTTCGACGGACGATGCCCAATACCAAGCGGTGCTTGAGTGGTGTAATGACGCTCGAACAGGCATGCCCCTCGGAATACCAAGGGGCGCAATGTGCGTTCAAAGATTCGATGATTCACTGAATTCTGCAATTCACATTACTTATCGCATTTCGCTGCGTTCTTCATCGATGCGAGAACCAAGAGATCCGTTGTTGAAAGTTTTAATTTAATTAAAATTTTATACTCAGACGACTGGTTTAAAACAAGAGTTTGGTTAGACTCTGGCGGGCGCTCGCCTGTCCGGAGACTGGCGCGCTCGGGAGAACCTTCGCGGTCCCGCCAAAGCAACGAA…	GTTTTGATTTAACTCTACTACGCCCGAAGTTGGAGAAACCCCGCCGAGGTCTTCGAGGCACGCCCGCCTTTCGACGGACGATGCCCAATACCAAGCGGTGCTTGAGTGGTGTAATGACGCTCGAACAGGCATGCCCCTCGGAATACCAAGGGGCGCAATGTGCGTTCAAAGATTCGATGATTCACTGAATTCTGCAATTCACATTACTTATCGCATTTCGCTGCGTTCTTCATCGATGCGAGAACCAAGAGATCCGTTGTTGAAAGTTTTAATTTAATTAAAATTTTATACTCAGACGACTGGTTTAAAACAAGAGTTTGGTTAGACTCTGGCGGGCGCTCGCCTGTCCGGGGACTGGCGCGCTCGGGAGAACCTTCGCGGTCCCGCCAAAGCAACGAA…	Ascomycota		unplaced (Tumularia)	Tumularia
78	G2_073_03	MT988259	MG207163.1	TGATCCGAGGTCAATCATGATAAAATTTGGGGTTCTGGCAGGACACCACCGGGACCCTATAGCGAGGAGTATTACTACGCTTAGAGCCAGATGGCACCGCCACTGCTTTTAAGGGCTGCCCTGTGACGGGCATGCCCCAACACCAAGCTGAGCTTGAGGGGTGATAATGACGCTCGAACAGGCATGCCCCCCGGAATACCCAGGGGGGCAATGTGCGTT	Cystobasidium sp.		MG207163.1 Uncultured Ascomycota clone New.ReferenceOTU484 5.8S ribosomal RNA gene, partial sequence; internal transcribed spacer 2, complete sequence; and large subunit ribosomal RNA gene, partial sequence	99.087	219	3.07e-108	217	2	0	0	TGATCCGAGGTCAATCATGATAAAATTTGGGGTTCTGGCAGGACACCACCGGGACCCTATAGCGAGGAGTATTACTACGCTTAGAGCCAGATGGCACCGCCACTGCTTTTAAGGGCTGCCCTGTGACGGGCATGCCCCAACACCAAGCTGAGCTTGAGGGGTGATAATGACGCTCGAACAGGCATGCCCCCCGGAATACCCAGGGGGGCAATGTGCGTT	TGATCCGAGGTCAATCATGATAAAATTTGGGGTTCTGGCAGGACACCACCGGGACCCTATAGCGAGGAGTATTACTACGCTTAGAGCCAGATGGCACCGCCACTGCTTTTAAGGGCTGCCCTGTGACGGGCATGCCCCAACACCAAGCTGAGCTTGAGGGGTGATAATGACGCTCGAACAGGCATGCCCCCCGGAATACCAAGGGGCGCAATGTGCGTT	Basidiomycota	Cystobasidiales	Cystobasidiaceae	Cystobasidium
79	B152	MT988225	MH684593.1	GAGGTCTAAGCTTAATGCTATTAGAAGCGAATTAGAAGCACCTCTTATATTTGAAGAAAACGTCCTTAGCGAAATAATTATTACGCCAAGTCAAACCGTTTATTTCAATAGGGTTGCTCGTGTATTTCAGTTGAGCCGGCAATTACGCCGACAGACAACCATAATCCAAGCCCACACCCATCTCATTACAAAATAGGGGGGTTGAGAGTTTCATGACACTCAAACAGACATACTCTTCGGAATACCAAAGAGTGCAAGGTGCGTTCAAAGATTCGATGATTCACTGAATTCTGCAATTCACATTACTTATCGCAATTCGCTGCGTTCTTCATCGATGCGAGAGCCAAGAGATCCGTTGCTGAAAGTTTTGTTTTTATTTATGCTCAATTAAGAGACTAT…	Cystobasidium aff. minutum		MH684593.1 Cystobasidium minutum strain GA25 small subunit ribosomal RNA gene, partial sequence; internal transcribed spacer 1 and 5.8S ribosomal RNA gene, complete sequence; and internal transcribed spacer 2, partial sequence	100	551	0	551	0	0	0	GAGGTCTAAGCTTAATGCTATTAGAAGCGAATTAGAAGCACCTCTTATATTTGAAGAAAACGTCCTTAGCGAAATAATTATTACGCCAAGTCAAACCGTTTATTTCAATAGGGTTGCTCGTGTATTTCAGTTGAGCCGGCAATTACGCCGACAGACAACCATAATCCAAGCCCACACCCATCTCATTACAAAATAGGGGGGTTGAGAGTTTCATGACACTCAAACAGACATACTCTTCGGAATACCAAAGAGTGCAAGGTGCGTTCAAAGATTCGATGATTCACTGAATTCTGCAATTCACATTACTTATCGCAATTCGCTGCGTTCTTCATCGATGCGAGAGCCAAGAGATCCGTTGCTGAAAGTTTTGTTTTTATTTATGCTCAATTAAGAGACTAT…	GAGGTCTAAGCTTAATGCTATTAGAAGCGAATTAGAAGCACCTCTTATATTTGAAGAAAACGTCCTTAGCGAAATAATTATTACGCCAAGTCAAACCGTTTATTTCAATAGGGTTGCTCGTGTATTTCAGTTGAGCCGGCAATTACGCCGACAGACAACCATAATCCAAGCCCACACCCATCTCATTACAAAATAGGGGGGTTGAGAGTTTCATGACACTCAAACAGACATACTCTTCGGAATACCAAAGAGTGCAAGGTGCGTTCAAAGATTCGATGATTCACTGAATTCTGCAATTCACATTACTTATCGCAATTCGCTGCGTTCTTCATCGATGCGAGAGCCAAGAGATCCGTTGCTGAAAGTTTTGTTTTTATTTATGCTCAATTAAGAGACTAT…	Basidiomycota	Cystobasidiales	Cystobasidiaceae	Cystobasidium
80	B153	MT988226	MH684593.1	TGAGGTCTAAGCTTAATGCTATTAGAAGCGAATTAGAAGCACCTCTTATATTTGAAGAAAACGTCCTTAGCGAAATAATTATTACGCCAAGTCAAACCGTTTATTTCAATAGGGTTGCTCGTGTATTTCAGTTGAGCCGGCAATTACGCCGACAGACAACCATAATCCAAGCCCACACCCATCTCATTACAAAATAGGGGGGTTGAGAGTTTCATGACACTCAAACAGACATACTCTTCGGAATACCAAAGAGTGCAAGGTGCGTTCAAAGATTCGATGATTCACTGAATTCTGCAATTCACATTACTTATCGCAATTCGCTGCGTTCTTCATCGATGCGAGAGCCAAGAGATCCGTTGCTGAAAGTTTTGTTTTTATTTATGCTCAATTAAGAGACTA…	Cystobasidium aff. minutum		MH684593.1 Cystobasidium minutum strain GA25 small subunit ribosomal RNA gene, partial sequence; internal transcribed spacer 1 and 5.8S ribosomal RNA gene, complete sequence; and internal transcribed spacer 2, partial sequence	100	552	0	552	0	0	0	TGAGGTCTAAGCTTAATGCTATTAGAAGCGAATTAGAAGCACCTCTTATATTTGAAGAAAACGTCCTTAGCGAAATAATTATTACGCCAAGTCAAACCGTTTATTTCAATAGGGTTGCTCGTGTATTTCAGTTGAGCCGGCAATTACGCCGACAGACAACCATAATCCAAGCCCACACCCATCTCATTACAAAATAGGGGGGTTGAGAGTTTCATGACACTCAAACAGACATACTCTTCGGAATACCAAAGAGTGCAAGGTGCGTTCAAAGATTCGATGATTCACTGAATTCTGCAATTCACATTACTTATCGCAATTCGCTGCGTTCTTCATCGATGCGAGAGCCAAGAGATCCGTTGCTGAAAGTTTTGTTTTTATTTATGCTCAATTAAGAGACTA…	TGAGGTCTAAGCTTAATGCTATTAGAAGCGAATTAGAAGCACCTCTTATATTTGAAGAAAACGTCCTTAGCGAAATAATTATTACGCCAAGTCAAACCGTTTATTTCAATAGGGTTGCTCGTGTATTTCAGTTGAGCCGGCAATTACGCCGACAGACAACCATAATCCAAGCCCACACCCATCTCATTACAAAATAGGGGGGTTGAGAGTTTCATGACACTCAAACAGACATACTCTTCGGAATACCAAAGAGTGCAAGGTGCGTTCAAAGATTCGATGATTCACTGAATTCTGCAATTCACATTACTTATCGCAATTCGCTGCGTTCTTCATCGATGCGAGAGCCAAGAGATCCGTTGCTGAAAGTTTTGTTTTTATTTATGCTCAATTAAGAGACTA…	Basidiomycota	Cystobasidiales	Cystobasidiaceae	Cystobasidium
81	G1_009	MT988227	MH684593.1	TGATTTGAGGTCTAAGCTTAATGCTATTAGAAGCGAATTAGAAGCACCTCTTATATTTGAAGAAAACGTCCTTAGCGAAATAATTATTACGCCAAGTCAAACCGTTTATTTCAATAGGGTTGCTCGTGTATTTCAGTTGAGCCGGCAATTACGCCGACAGACAACCATAATCCAAGCCCACACCCATCTCATTACAAAATAGGGGGGTTGAGAGTTTCATGACACTCAAACAGACATACTCTTCGGAATACCAAAGAGTGCAAGGTGCGTTCAAAGATTCGATGATTCACTGAATTCTGCAATTCACATTACTTATCGCAATTCGCTGCGTTCTTCATCGATGCGAGAGCCAAGAGATCCGTTGCTGAAAGTTTTGTTTTTATTTATGCTCAATTAAGA…	Cystobasidium aff. minutum		MH684593.1 Cystobasidium minutum strain GA25 small subunit ribosomal RNA gene, partial sequence; internal transcribed spacer 1 and 5.8S ribosomal RNA gene, complete sequence; and internal transcribed spacer 2, partial sequence	100	542	0	542	0	0	0	TGATTTGAGGTCTAAGCTTAATGCTATTAGAAGCGAATTAGAAGCACCTCTTATATTTGAAGAAAACGTCCTTAGCGAAATAATTATTACGCCAAGTCAAACCGTTTATTTCAATAGGGTTGCTCGTGTATTTCAGTTGAGCCGGCAATTACGCCGACAGACAACCATAATCCAAGCCCACACCCATCTCATTACAAAATAGGGGGGTTGAGAGTTTCATGACACTCAAACAGACATACTCTTCGGAATACCAAAGAGTGCAAGGTGCGTTCAAAGATTCGATGATTCACTGAATTCTGCAATTCACATTACTTATCGCAATTCGCTGCGTTCTTCATCGATGCGAGAGCCAAGAGATCCGTTGCTGAAAGTTTTGTTTTTATTTATGCTCAATTAAGA…	TGATTTGAGGTCTAAGCTTAATGCTATTAGAAGCGAATTAGAAGCACCTCTTATATTTGAAGAAAACGTCCTTAGCGAAATAATTATTACGCCAAGTCAAACCGTTTATTTCAATAGGGTTGCTCGTGTATTTCAGTTGAGCCGGCAATTACGCCGACAGACAACCATAATCCAAGCCCACACCCATCTCATTACAAAATAGGGGGGTTGAGAGTTTCATGACACTCAAACAGACATACTCTTCGGAATACCAAAGAGTGCAAGGTGCGTTCAAAGATTCGATGATTCACTGAATTCTGCAATTCACATTACTTATCGCAATTCGCTGCGTTCTTCATCGATGCGAGAGCCAAGAGATCCGTTGCTGAAAGTTTTGTTTTTATTTATGCTCAATTAAGA…	Basidiomycota	Cystobasidiales	Cystobasidiaceae	Cystobasidium
82	B109	MT988228	NR_154834.1	AAAATATAAATGCTATAAAAGCGCATTAGAAGCACCTCTTACTTTTGAAGAAAACGTCCTCAGCGAAATAATTATTACGCCGAGTCAAGCCGTTTATTTCAAATGGGTTGCTCGTGTATTTCAACTGAGCCGGCAATTACGCCGACAGCAGTCATAATCCAAGCCCACGCCCATCTCATTACAAAATAGGGGGGTTGAGAGTTTCATGACACTCAAACAGACATACTCTTCGGAATACCAAAGAGTGCAAGGTGCGTTCAAAGATTCGATGATTCACTGAATTCTGCAATTCACATTACTTATCGCAATTCGCTGCGTTCTTCATCGATGCGAGAGCCAAGAGATCCGTTGCTGAAAGTTTTATTTTTATTTATGCTCAATAAAGAGACTGTTACATTC…	Cystobasidium aff. pinicola		NR_154834.1 Cystobasidium pinicola CBS 9130 ITS region; from TYPE material >KY103147.1 Cystobasidium pinicola culture CBS:9130 small subunit ribosomal RNA gene, partial sequence; internal transcribed spacer 1, 5.8S ribosomal RNA gene, and internal transcribed spacer 2, complete sequence; and large subunit ribosomal RNA gene, partial sequence	100	533	0	533	0	0	0	AAAATATAAATGCTATAAAAGCGCATTAGAAGCACCTCTTACTTTTGAAGAAAACGTCCTCAGCGAAATAATTATTACGCCGAGTCAAGCCGTTTATTTCAAATGGGTTGCTCGTGTATTTCAACTGAGCCGGCAATTACGCCGACAGCAGTCATAATCCAAGCCCACGCCCATCTCATTACAAAATAGGGGGGTTGAGAGTTTCATGACACTCAAACAGACATACTCTTCGGAATACCAAAGAGTGCAAGGTGCGTTCAAAGATTCGATGATTCACTGAATTCTGCAATTCACATTACTTATCGCAATTCGCTGCGTTCTTCATCGATGCGAGAGCCAAGAGATCCGTTGCTGAAAGTTTTATTTTTATTTATGCTCAATAAAGAGACTGTTACATTC…	AAAATATAAATGCTATAAAAGCGCATTAGAAGCACCTCTTACTTTTGAAGAAAACGTCCTCAGCGAAATAATTATTACGCCGAGTCAAGCCGTTTATTTCAAATGGGTTGCTCGTGTATTTCAACTGAGCCGGCAATTACGCCGACAGCAGTCATAATCCAAGCCCACGCCCATCTCATTACAAAATAGGGGGGTTGAGAGTTTCATGACACTCAAACAGACATACTCTTCGGAATACCAAAGAGTGCAAGGTGCGTTCAAAGATTCGATGATTCACTGAATTCTGCAATTCACATTACTTATCGCAATTCGCTGCGTTCTTCATCGATGCGAGAGCCAAGAGATCCGTTGCTGAAAGTTTTATTTTTATTTATGCTCAATAAAGAGACTGTTACATTC…	Basidiomycota	Cystobasidiales	Cystobasidiaceae	Cystobasidium
83	B108	MT988229	MK267900.1	GTCCTTAGCGAAATAATTATTACGCCAAGTCAAACCGTTTATTTAAATAGGGTTGCTCGTGTATTTCAGTTGAGCCGGCAATTACGCCGACAGACAACCATAATCCAAGCCCACGCCCATTTCATTACAAAATAGGGGGGTTGAGAGTTTCATGACACTCAAACAGACATACTCTTCGGAATACCAAAGAGTGCAAGGTGCGTTCAAAGATTCGATGATTCACTGAATTCTGCAATTCACATTACTTATCGCAATTCGCTGCGTTCTTCATCGATGCGAGAGCCAAGAGATCCGTTGCTGAAAGTTTTATTTTTTTTTATGCTCAATAAAGAGACTATTACATTCTTATACTAAGGTGTTAAAAGTGTGTGTAAAAAAGAAGTGTGTGCACAGTGTAAG…	Cystobasidium aff. slooffiae		MK267900.1 Cystobasidium slooffiae isolate R96651_ITS small subunit ribosomal RNA gene, partial sequence; internal transcribed spacer 1, 5.8S ribosomal RNA gene, and internal transcribed spacer 2, complete sequence; and large subunit ribosomal RNA gene, partial sequence	98.394	498	0	490	6	2	2	GTCCTTAGCGAAATAATTATTACGCCAAGTCAAACCGTTTATTTAAATAGGGTTGCTCGTGTATTTCAGTTGAGCCGGCAATTACGCCGACAGACAACCATAATCCAAGCCCACGCCCATTTCATTACAAAATAGGGGGGTTGAGAGTTTCATGACACTCAAACAGACATACTCTTCGGAATACCAAAGAGTGCAAGGTGCGTTCAAAGATTCGATGATTCACTGAATTCTGCAATTCACATTACTTATCGCAATTCGCTGCGTTCTTCATCGATGCGAGAGCCAAGAGATCCGTTGCTGAAAGTTTTATTTTTTTTTATGCTCAATAAAGAGACTATTACATTCTTATACTAAGGTGTTAAAAGTGTGTGTAAAAAAGAAGTGTGTGCACAGTGTAAG…	GTCCTTAGCGAAATAATTATTACGCCAAGTCAAACCGTTTATTTCAATAGGGTTGCTCGTGTATTTCAGTTGAGCCGGCAATTACGCCGACAGACAACCATAATCCAAGCCCACACCCATCTCATTACAAAATAGGGGGGTTGAGAGTTTCATGACACTCAAACAGACATACTCTTCGGAATACCAAAGAGTGCAAGGTGCGTTCAAAGATTCGATGATTCACTGAATTCTGCAATTCACATTACTTATCGCAATTCGCTGCGTTCTTCATCGATGCGAGAGCCAAGAGATCCGTTGCTGAAAGTTTTGTTTTTATTTATGCTCAATTAAGAGACTATTACATTCTTATACTAAGGTGTTAAAAGTGTGTGTAAAAAAGAAGTGTGTGCACAGTGTAAG…	Basidiomycota	Cystobasidiales	Cystobasidiaceae	Cystobasidium
84	B111	MT988230	KX067831.1	CCTTAGCGAAATAACTATTACGCCAAGTCAAACCGTTTATTTAAATAGGGTTGCTCGTGTATTTCAGTTGAGCCGGCAATTACGCCGACAGACAACCATAATCCAAGCCCACGCCCATTTCATTACAAAATAGGGGGGTTGAGAGTTTCATGACACTCAAACAGACATACTCTTCGGAATACCAAAGAGTGCAAGGTGCGTTCAAAGATTCGATGATTCACTGAATTCTGCAATTCACATTACTTATCGCAATTCGCTGCGTTCTTCATCGATGCGAGAGCCAAGAGATCCGTTGCTGAAAGTTTTAATTTTATTTATGCTCAATAAAGAGACTATTACATTCTTATACTAAGGTGTTAAAAGTGTGTGTAAAAAAGAAGTGTGTGCACAGTGTAAGAA…	Cystobasidium aff. slooffiae		KX067831.1 Cystobasidium slooffiae isolate RP314_6 internal transcribed spacer 1, partial sequence; 5.8S ribosomal RNA gene and internal transcribed spacer 2, complete sequence; and 28S ribosomal RNA gene, partial sequence	99.149	470	0	466	1	3	3	CCTTAGCGAAATAACTATTACGCCAAGTCAAACCGTTTATTTAAATAGGGTTGCTCGTGTATTTCAGTTGAGCCGGCAATTACGCCGACAGACAACCATAATCCAAGCCCACGCCCATTTCATTACAAAATAGGGGGGTTGAGAGTTTCATGACACTCAAACAGACATACTCTTCGGAATACCAAAGAGTGCAAGGTGCGTTCAAAGATTCGATGATTCACTGAATTCTGCAATTCACATTACTTATCGCAATTCGCTGCGTTCTTCATCGATGCGAGAGCCAAGAGATCCGTTGCTGAAAGTTTTAATTTTATTTATGCTCAATAAAGAGACTATTACATTCTTATACTAAGGTGTTAAAAGTGTGTGTAAAAAAGAAGTGTGTGCACAGTGTAAGAA…	CCTTAGCGAAATAATTATTACGCCAAGTCAAACCGTTTATTTAAATAGGGTTGCTCGTGTATTTCAGTTGAGCCGGCAATTACGCCGACAGACAACCATAATCCAAGCCCACGCCCATTTCATTACAAAATAGGGGGGTTGAGAGTTTCATGACACTCAAACAGACATACTCTTCGGAATACCAAAGAGTGCAAGGTGCGTTCAAAGATTCGATGATTCACTGAATTCTGCAATTCACATTACTTATCGCAATTCGCTGCGTTCTTCATCGATGCGAGAGCCAAGAGATCCGTTGCTGAAAGTTTTAATTTTATTTATGCTCAATAAAGAGACTATTACATTCTTATACTAAGGTGTTAAAAGTGTGTGTAAAAAAGAAGTGTGTGCACAGTGTAAGAA…	Basidiomycota	Cystobasidiales	Cystobasidiaceae	Cystobasidium
85	B113	MT988231	KX067831.1	GTCCTTAGCGAAATAACTATTACGCCAAGTCAAACCGTTTATTTAAATAGGGTTGCTCGTGTATTTCAGTTGAGCCGGCAATTACGCCGACAGACAACCATAATCCAAGCCCACGCCCATTTCATTACAAAATAGGGGGGTTGAGAGTTTCATGACACTCAAACAGACATACTCTTCGGAATACCAAAGAGTGCAAGGTGCGTTCAAAGATTCGATGATTCACTGAATTCTGCAATTCACATTACTTATCGCAATTCGCTGCGTTCTTCATCGATGCGAGAGCCAAGAGATCCGTTGCTGAAAGTTTTAATTTTATTTATGCTCAATAAAGAGACTATTACATTCTTATACTAAGGTGTTAAAAGTGTGTGTAAAAAAGAAGTGTGTGCACAGTGTAAG…	Cystobasidium aff. slooffiae		KX067831.1 Cystobasidium slooffiae isolate RP314_6 internal transcribed spacer 1, partial sequence; 5.8S ribosomal RNA gene and internal transcribed spacer 2, complete sequence; and 28S ribosomal RNA gene, partial sequence	99.153	472	0	468	1	3	3	GTCCTTAGCGAAATAACTATTACGCCAAGTCAAACCGTTTATTTAAATAGGGTTGCTCGTGTATTTCAGTTGAGCCGGCAATTACGCCGACAGACAACCATAATCCAAGCCCACGCCCATTTCATTACAAAATAGGGGGGTTGAGAGTTTCATGACACTCAAACAGACATACTCTTCGGAATACCAAAGAGTGCAAGGTGCGTTCAAAGATTCGATGATTCACTGAATTCTGCAATTCACATTACTTATCGCAATTCGCTGCGTTCTTCATCGATGCGAGAGCCAAGAGATCCGTTGCTGAAAGTTTTAATTTTATTTATGCTCAATAAAGAGACTATTACATTCTTATACTAAGGTGTTAAAAGTGTGTGTAAAAAAGAAGTGTGTGCACAGTGTAAG…	GTCCTTAGCGAAATAATTATTACGCCAAGTCAAACCGTTTATTTAAATAGGGTTGCTCGTGTATTTCAGTTGAGCCGGCAATTACGCCGACAGACAACCATAATCCAAGCCCACGCCCATTTCATTACAAAATAGGGGGGTTGAGAGTTTCATGACACTCAAACAGACATACTCTTCGGAATACCAAAGAGTGCAAGGTGCGTTCAAAGATTCGATGATTCACTGAATTCTGCAATTCACATTACTTATCGCAATTCGCTGCGTTCTTCATCGATGCGAGAGCCAAGAGATCCGTTGCTGAAAGTTTTAATTTTATTTATGCTCAATAAAGAGACTATTACATTCTTATACTAAGGTGTTAAAAGTGTGTGTAAAAAAGAAGTGTGTGCACAGTGTAAG…	Basidiomycota	Cystobasidiales	Cystobasidiaceae	Cystobasidium
86	B115	MT988232	KX067831.1	GTCCTTAGCGAAATAACTATTACGCCAAGTCAAACCGTTTATTTAAATAGGGTTGCTCGTGTATTTCAGTTGAGCCGGCAATTACGCCGACAGACAACCATAATCCAAGCCCACGCCCATTTCATTACAAAATAGGGGGGTTGAGAGTTTCATGACACTCAAACAGACATACTCTTCGGAATACCAAAGAGTGCAAGGTGCGTTCAAAGATTCGATGATTCACTGAATTCTGCAATTCACATTACTTATCGCAATTCGCTGCGTTCTTCATCGATGCGAGAGCCAAGAGATCCGTTGCTGAAAGTTTTAATTTTATTTATGCTCAATAAAGAGACTATTACATTCTTATACTAAGGTGTTAAAAGTGTGTGTAAAAAAGAAGTGTGTGCACAGTGTAAG…	Cystobasidium aff. slooffiae		KX067831.1 Cystobasidium slooffiae isolate RP314_6 internal transcribed spacer 1, partial sequence; 5.8S ribosomal RNA gene and internal transcribed spacer 2, complete sequence; and 28S ribosomal RNA gene, partial sequence	99.153	472	0	468	1	3	3	GTCCTTAGCGAAATAACTATTACGCCAAGTCAAACCGTTTATTTAAATAGGGTTGCTCGTGTATTTCAGTTGAGCCGGCAATTACGCCGACAGACAACCATAATCCAAGCCCACGCCCATTTCATTACAAAATAGGGGGGTTGAGAGTTTCATGACACTCAAACAGACATACTCTTCGGAATACCAAAGAGTGCAAGGTGCGTTCAAAGATTCGATGATTCACTGAATTCTGCAATTCACATTACTTATCGCAATTCGCTGCGTTCTTCATCGATGCGAGAGCCAAGAGATCCGTTGCTGAAAGTTTTAATTTTATTTATGCTCAATAAAGAGACTATTACATTCTTATACTAAGGTGTTAAAAGTGTGTGTAAAAAAGAAGTGTGTGCACAGTGTAAG…	GTCCTTAGCGAAATAATTATTACGCCAAGTCAAACCGTTTATTTAAATAGGGTTGCTCGTGTATTTCAGTTGAGCCGGCAATTACGCCGACAGACAACCATAATCCAAGCCCACGCCCATTTCATTACAAAATAGGGGGGTTGAGAGTTTCATGACACTCAAACAGACATACTCTTCGGAATACCAAAGAGTGCAAGGTGCGTTCAAAGATTCGATGATTCACTGAATTCTGCAATTCACATTACTTATCGCAATTCGCTGCGTTCTTCATCGATGCGAGAGCCAAGAGATCCGTTGCTGAAAGTTTTAATTTTATTTATGCTCAATAAAGAGACTATTACATTCTTATACTAAGGTGTTAAAAGTGTGTGTAAAAAAGAAGTGTGTGCACAGTGTAAG…	Basidiomycota	Cystobasidiales	Cystobasidiaceae	Cystobasidium
87	B116	MT988233	KX067831.1	CGTTCTTTTTAGAGTCCGACCCTTTCATTTTCTTACACTGTGCACACACTTCTTTTTTACACACACTTTTAACACCTTAGTATAAGAATGTAATAGTCTCTTTATTGAGCATAAATAAAATTAAAACTTTCAGCAACGGATCTCTTGGCTCTCGCATCGATGAAGAACGCAGCGAATTGCGATAAGTAATGTGAATTGCAGAATTCAGTGAATCATCGAATCTTTGAACGCACCTTGCACTCTTTGGTATTCCGAAGAGTATGTCTGTTTGAGTGTCATGAAACTCTCAACCCCCCTATTTTGTAATGAAATGGGCGTGGGCTTGGATTATGGTTGTCTGTCGGCGTAATTGCCGGCTCAACTGAAATACACGAGCAACCCTATTTAAATAAACGGTTT…	Cystobasidium aff. slooffiae		KX067831.1 Cystobasidium slooffiae isolate RP314_6 internal transcribed spacer 1, partial sequence; 5.8S ribosomal RNA gene and internal transcribed spacer 2, complete sequence; and 28S ribosomal RNA gene, partial sequence	99.632	544	0	542	1	1	1	CGTTCTTTTTAG-AGTCCGACCCTTTCATTTTCTTACACTGTGCACACACTTCTTTTTTACACACACTTTTAACACCTTAGTATAAGAATGTAATAGTCTCTTTATTGAGCATAAATAAAATTAAAACTTTCAGCAACGGATCTCTTGGCTCTCGCATCGATGAAGAACGCAGCGAATTGCGATAAGTAATGTGAATTGCAGAATTCAGTGAATCATCGAATCTTTGAACGCACCTTGCACTCTTTGGTATTCCGAAGAGTATGTCTGTTTGAGTGTCATGAAACTCTCAACCCCCCTATTTTGTAATGAAATGGGCGTGGGCTTGGATTATGGTTGTCTGTCGGCGTAATTGCCGGCTCAACTGAAATACACGAGCAACCCTATTTAAATAAACGGTT…	CGTTCTTTTTAGAAGTCCGACCCTTTCATTTTCTTACACTGTGCACACACTTCTTTTTTACACACACTTTTAACACCTTAGTATAAGAATGTAATAGTCTCTTTATTGAGCATAAATAAAATTAAAACTTTCAGCAACGGATCTCTTGGCTCTCGCATCGATGAAGAACGCAGCGAATTGCGATAAGTAATGTGAATTGCAGAATTCAGTGAATCATCGAATCTTTGAACGCACCTTGCACTCTTTGGTATTCCGAAGAGTATGTCTGTTTGAGTGTCATGAAACTCTCAACCCCCCTATTTTGTAATGAAATGGGCGTGGGCTTGGATTATGGTTGTCTGTCGGCGTAATTGCCGGCTCAACTGAAATACACGAGCAACCCTATTTAAATAAACGGTT…	Basidiomycota	Cystobasidiales	Cystobasidiaceae	Cystobasidium
88	B121	MT988234	MN848425.1	CGTTCTTTTTAGAGTCCGACCCTTTCATTTTCTTACACTGTGCACACACTTCTTTTTTACACACACTTTTAACACCTTAGTATAAGAATGTAATAGTCTCTTTATTGAGCATAAAAAAAAATAAAACTTTCAGCAACGGATCTCTTGGCTCTCGCATCGATGAAGAACGCAGCGAATTGCGATAAGTAATGTGAATTGCAGAATTCAGTGAATCATCGAATCTTTGAACGCACCTTGCACTCTTTGGTATTCCGAAGAGTATGTCTGTTTGAGTGTCATGAAACTCTCAACCCCCCTATTTTGTAATGAAATGGGCGTGGGCTTGGATTATGGTTGTCTGTCGGCGTAATTGCCGGCTCAACTGAAATACACGAGCAACCCTATTTAAATAAACGGTTT…	Cystobasidium aff. slooffiae		MN848425.1 Cystobasidium slooffiae strain AD384 internal transcribed spacer 1, partial sequence; 5.8S ribosomal RNA gene and internal transcribed spacer 2, complete sequence; and large subunit ribosomal RNA gene, partial sequence	99.449	544	0	541	2	1	1	CGTTCTTTTTAGAGTCCGACCCTTTCATTTTCTTACACTGTGCACACACTTCTTTTTTACACACACTTTTAACACCTTAGTATAAGAATGTAATAGTCTCTTTATTGAGCATAAAAAAAAATAAAACTTTCAGCAACGGATCTCTTGGCTCTCGCATCGATGAAGAACGCAGCGAATTGCGATAAGTAATGTGAATTGCAGAATTCAGTGAATCATCGAATCTTTGAACGCACCTTGCACTCTTTGGTATTCCGAAGAGTATGTCTGTTTGAGTGTCATGAAACTCTCAACCCCCCTATTTTGTAATGAAATGGGCGTGGGCTTGGATTATGGTTGTCTGTCGGCGTAATTGCCGGCTCAACTGAAATACACGAGCAACCCTATTTAAATAAACGGTTT…	CGTTCTTTTTAGAGTCCGACCCTTTCATTTTCTTACACTGTGCACACACTTCTTTTTTACACACACTTTTAACACCTTAGTATAAGAATGTAATAGTCTCTTTATTGAGCATAAATAAAATTAAAACTTTCAGCAACGGATCTCTTGGCTCTCGCATCGATGAAGAACGCAGCGAATTGCGATAAGTAATGTGAATTGCAGAATTCAGTGAATCATCGAATCTTTGAACGCACCTTGCACTCTTTGGTATTCCGAAGAGTATGTCTGTTTGAGTGTCATGAAACTCTCAACCCCCCTATTTTGTAATGAAATGGGCGTGGGCTTGGATTATGGTTGTCTGTCGGCGTAATTGCCGGCTCAACTGAAATACACGAGCAACCCTATTTAAATAAACGGTTT…	Basidiomycota	Cystobasidiales	Cystobasidiaceae	Cystobasidium
89	B126	MT988235	KX067831.1	TTGTACGACGTTCTTTTTAGAGTCCGACCCTTTCATTTTCTTACACTGTGCACACACTTCTTTTTTACACACACTTTTAACACCTTAGTATAAGAATGTAATAGTCTCTTTATTGAGCATAAATAAAATTAAAACTTTCAGCAACGGATCTCTTGGCTCTCGCATCGATGAAGAACGCAGCGAATTGCGATAAGTAATGTGAATTGCAGAATTCAGTGAATCATCGAATCTTTGAACGCACCTTGCACTCTTTGGTATTCCGAAGAGTATGTCTGTTTGAGTGTCATGAAACTCTCAACCCCCCTATTTTGTAATGAAATGGGCGTGGGCTTGGATTATGGTTGTCTGTCGGCGTAATTGCCGGCTCAACTGAAATACACGAGCAACCCTATTTAAATA…	Cystobasidium aff. slooffiae		KX067831.1 Cystobasidium slooffiae isolate RP314_6 internal transcribed spacer 1, partial sequence; 5.8S ribosomal RNA gene and internal transcribed spacer 2, complete sequence; and 28S ribosomal RNA gene, partial sequence	99.275	552	0	548	3	1	1	TTGTACGACGTTCTTTTTAG-AGTCCGACCCTTTCATTTTCTTACACTGTGCACACACTTCTTTTTTACACACACTTTTAACACCTTAGTATAAGAATGTAATAGTCTCTTTATTGAGCATAAATAAAATTAAAACTTTCAGCAACGGATCTCTTGGCTCTCGCATCGATGAAGAACGCAGCGAATTGCGATAAGTAATGTGAATTGCAGAATTCAGTGAATCATCGAATCTTTGAACGCACCTTGCACTCTTTGGTATTCCGAAGAGTATGTCTGTTTGAGTGTCATGAAACTCTCAACCCCCCTATTTTGTAATGAAATGGGCGTGGGCTTGGATTATGGTTGTCTGTCGGCGTAATTGCCGGCTCAACTGAAATACACGAGCAACCCTATTTAAAT…	TTTTAGGACGTTCTTTTTAGAAGTCCGACCCTTTCATTTTCTTACACTGTGCACACACTTCTTTTTTACACACACTTTTAACACCTTAGTATAAGAATGTAATAGTCTCTTTATTGAGCATAAATAAAATTAAAACTTTCAGCAACGGATCTCTTGGCTCTCGCATCGATGAAGAACGCAGCGAATTGCGATAAGTAATGTGAATTGCAGAATTCAGTGAATCATCGAATCTTTGAACGCACCTTGCACTCTTTGGTATTCCGAAGAGTATGTCTGTTTGAGTGTCATGAAACTCTCAACCCCCCTATTTTGTAATGAAATGGGCGTGGGCTTGGATTATGGTTGTCTGTCGGCGTAATTGCCGGCTCAACTGAAATACACGAGCAACCCTATTTAAAT…	Basidiomycota	Cystobasidiales	Cystobasidiaceae	Cystobasidium
90	B127	MT988236	KX067831.1	GACGTTCTTTTTAGAGTCCGACCCTTTCATTTTCTTACACTGTGCACACACTTCTTTTTTACACACACTTTTAACACCTTAGTATAAGAATGTAATAGTCTCTTTATTGAGCATAAATAAAATTAAAACTTTCAGCAACGGATCTCTTGGCTCTCGCATCGATGAAGAACGCAGCGAATTGCGATAAGTAATGTGAATTGCAGAATTCAGTGAATCATCGAATCTTTGAACGCACCTTGCACTCTTTGGTATTCCGAAGAGTATGTCTGTTTGAGTGTCATGAAACTCTCAACCCCCCTATTTTGTAATGAAATGGGCGTGGGCTTGGATTATGGTTGTCTGTCGGCGTAATTGCCGGCTCAACTGAAATACACGAGCAACCCTATTTAAATAAACGGT…	Cystobasidium aff. slooffiae		KX067831.1 Cystobasidium slooffiae isolate RP314_6 internal transcribed spacer 1, partial sequence; 5.8S ribosomal RNA gene and internal transcribed spacer 2, complete sequence; and 28S ribosomal RNA gene, partial sequence	99.634	546	0	544	1	1	1	GACGTTCTTTTTAG-AGTCCGACCCTTTCATTTTCTTACACTGTGCACACACTTCTTTTTTACACACACTTTTAACACCTTAGTATAAGAATGTAATAGTCTCTTTATTGAGCATAAATAAAATTAAAACTTTCAGCAACGGATCTCTTGGCTCTCGCATCGATGAAGAACGCAGCGAATTGCGATAAGTAATGTGAATTGCAGAATTCAGTGAATCATCGAATCTTTGAACGCACCTTGCACTCTTTGGTATTCCGAAGAGTATGTCTGTTTGAGTGTCATGAAACTCTCAACCCCCCTATTTTGTAATGAAATGGGCGTGGGCTTGGATTATGGTTGTCTGTCGGCGTAATTGCCGGCTCAACTGAAATACACGAGCAACCCTATTTAAATAAACGG…	GACGTTCTTTTTAGAAGTCCGACCCTTTCATTTTCTTACACTGTGCACACACTTCTTTTTTACACACACTTTTAACACCTTAGTATAAGAATGTAATAGTCTCTTTATTGAGCATAAATAAAATTAAAACTTTCAGCAACGGATCTCTTGGCTCTCGCATCGATGAAGAACGCAGCGAATTGCGATAAGTAATGTGAATTGCAGAATTCAGTGAATCATCGAATCTTTGAACGCACCTTGCACTCTTTGGTATTCCGAAGAGTATGTCTGTTTGAGTGTCATGAAACTCTCAACCCCCCTATTTTGTAATGAAATGGGCGTGGGCTTGGATTATGGTTGTCTGTCGGCGTAATTGCCGGCTCAACTGAAATACACGAGCAACCCTATTTAAATAAACGG…	Basidiomycota	Cystobasidiales	Cystobasidiaceae	Cystobasidium
91	B134	MT988237	KX067831.1	GTCTAAGCTTAATGCTATAAAAGCGAATTAGTAGCACCTCTTATATTTTAAGAAAACGTCCTTAGCGAAATAACTATTACGCCAAGTCAAACCGTTTATTTAAATAGGGTTGCTCGTGTATTTCAGTTGAGCCGGCAATTACGCCGACAGACAACCATAATCCAAGCCCACGCCCATTTCATTACAAAATAGGGGGGTTGAGAGTTTCATGACACTCAAACAGACATACTCTTCGGAATACCAAAGAGTGCAAGGTGCGTTCAAAGATTCGATGATTCACTGAATTCTGCAATTCACATTACTTATCGCAATTCGCTGCGTTCTTCATCGATGCGAGAGCCAAGAGATCCGTTGCTGAAAGTTTTAATTTTATTTATGCTCAATAAAGAGACTATTACA…	Cystobasidium aff. slooffiae		KX067831.1 Cystobasidium slooffiae isolate RP314_6 internal transcribed spacer 1, partial sequence; 5.8S ribosomal RNA gene and internal transcribed spacer 2, complete sequence; and 28S ribosomal RNA gene, partial sequence	98.87	531	0	525	1	5	5	GTCT-AAGCTT-AATGCTATAAAAGCGAATTAGTAGCACCTCTTATATTTTAAGAAAACGTCCTTAGCGAAATAACTATTACGCCAAGTCAAACCGTTTATTTAAATAGGGTTGCTCGTGTATTTCAGTTGAGCCGGCAATTACGCCGACAGACAACCATAATCCAAGCCCACGCCCATTTCATTACAAAATAGGGGGGTTGAGAGTTTCATGACACTCAAACAGACATACTCTTCGGAATACCAAAGAGTGCAAGGTGCGTTCAAAGATTCGATGATTCACTGAATTCTGCAATTCACATTACTTATCGCAATTCGCTGCGTTCTTCATCGATGCGAGAGCCAAGAGATCCGTTGCTGAAAGTTTTAATTTTATTTATGCTCAATAAAGAGACTATTA…	GTCTAAAGCTTAAATGCTATAAAAGCGAATTAGTAGCACCTCTTATATTTTAAGAAAACGTCCTTAGCGAAATAATTATTACGCCAAGTCAAACCGTTTATTTAAATAGGGTTGCTCGTGTATTTCAGTTGAGCCGGCAATTACGCCGACAGACAACCATAATCCAAGCCCACGCCCATTTCATTACAAAATAGGGGGGTTGAGAGTTTCATGACACTCAAACAGACATACTCTTCGGAATACCAAAGAGTGCAAGGTGCGTTCAAAGATTCGATGATTCACTGAATTCTGCAATTCACATTACTTATCGCAATTCGCTGCGTTCTTCATCGATGCGAGAGCCAAGAGATCCGTTGCTGAAAGTTTTAATTTTATTTATGCTCAATAAAGAGACTATTA…	Basidiomycota	Cystobasidiales	Cystobasidiaceae	Cystobasidium
92	B157	MT988238	KX067831.1	GTCTAAGCTTAATGCTATAAAAGCGAATTAGTAGCACCTCTTATATTTTAAGAAAACGTCCTTAGCGAAATAATTATTACGCCAAGTCAAACCGTTTATTTAAATAGGGTTGCTCGTGTATTTCAGTTGAGCCGGCAATTACGCCGACAGACAACCATAATCCAAGCCCACGCCCATTTCATTACAAAATAGGGGGGTTGAGAGTTTCATGACACTCAAACAGACATACTCTTCGGAATACCAAAGAGTGCAAGGTGCGTTCAAAGATTCGATGATTCACTGAATTCTGCAATTCACATTACTTATCGCAATTCGCTGCGTTCTTCATCGATGCGAGAGCCAAGAGATCCGTTGCTGAAAGTTTTAATTTTATTTATGCTCAATAAAGAGACTATTACA…	Cystobasidium aff. slooffiae		KX067831.1 Cystobasidium slooffiae isolate RP314_6 internal transcribed spacer 1, partial sequence; 5.8S ribosomal RNA gene and internal transcribed spacer 2, complete sequence; and 28S ribosomal RNA gene, partial sequence	99.058	531	0	526	0	5	5	GTCT-AAGCTT-AATGCTATAAAAGCGAATTAGTAGCACCTCTTATATTTTAAGAAAACGTCCTTAGCGAAATAATTATTACGCCAAGTCAAACCGTTTATTTAAATAGGGTTGCTCGTGTATTTCAGTTGAGCCGGCAATTACGCCGACAGACAACCATAATCCAAGCCCACGCCCATTTCATTACAAAATAGGGGGGTTGAGAGTTTCATGACACTCAAACAGACATACTCTTCGGAATACCAAAGAGTGCAAGGTGCGTTCAAAGATTCGATGATTCACTGAATTCTGCAATTCACATTACTTATCGCAATTCGCTGCGTTCTTCATCGATGCGAGAGCCAAGAGATCCGTTGCTGAAAGTTTTAATTTTATTTATGCTCAATAAAGAGACTATTA…	GTCTAAAGCTTAAATGCTATAAAAGCGAATTAGTAGCACCTCTTATATTTTAAGAAAACGTCCTTAGCGAAATAATTATTACGCCAAGTCAAACCGTTTATTTAAATAGGGTTGCTCGTGTATTTCAGTTGAGCCGGCAATTACGCCGACAGACAACCATAATCCAAGCCCACGCCCATTTCATTACAAAATAGGGGGGTTGAGAGTTTCATGACACTCAAACAGACATACTCTTCGGAATACCAAAGAGTGCAAGGTGCGTTCAAAGATTCGATGATTCACTGAATTCTGCAATTCACATTACTTATCGCAATTCGCTGCGTTCTTCATCGATGCGAGAGCCAAGAGATCCGTTGCTGAAAGTTTTAATTTTATTTATGCTCAATAAAGAGACTATTA…	Basidiomycota	Cystobasidiales	Cystobasidiaceae	Cystobasidium
93	B158	MT988239	KX067831.1	GACGTTCTTTTTAGAGTCCGACCCTTTCATTTTCTTACACTGTGCACACACTTCTTTTTTACACACACTTTTAACACCTTAGTATAAGAATGTAATAGTCTCTTTATTGAGCATAAATAAAATTAAAACTTTCAGCAACGGATCTCTTGGCTCTCGCATCGATGAAGAACGCAGCGAATTGCGATAAGTAATGTGAATTGCAGAATTCAGTGAATCATCGAATCTTTGAACGCACCTTGCACTCTTTGGTATTCCGAAGAGTATGTCTGTTTGAGTGTCATGAAACTCTCAACCCCCCTATTTTGTAATGAAATGGGCGTGGGCTTGGATTATGGTTGTCTGTCGGCGTAATTGCCGGCTCAACTGAAATACACGAGCAACCCTATTTAAATAAACGGT…	Cystobasidium aff. slooffiae		KX067831.1 Cystobasidium slooffiae isolate RP314_6 internal transcribed spacer 1, partial sequence; 5.8S ribosomal RNA gene and internal transcribed spacer 2, complete sequence; and 28S ribosomal RNA gene, partial sequence	99.817	547	0	546	0	1	1	GACGTTCTTTTTAG-AGTCCGACCCTTTCATTTTCTTACACTGTGCACACACTTCTTTTTTACACACACTTTTAACACCTTAGTATAAGAATGTAATAGTCTCTTTATTGAGCATAAATAAAATTAAAACTTTCAGCAACGGATCTCTTGGCTCTCGCATCGATGAAGAACGCAGCGAATTGCGATAAGTAATGTGAATTGCAGAATTCAGTGAATCATCGAATCTTTGAACGCACCTTGCACTCTTTGGTATTCCGAAGAGTATGTCTGTTTGAGTGTCATGAAACTCTCAACCCCCCTATTTTGTAATGAAATGGGCGTGGGCTTGGATTATGGTTGTCTGTCGGCGTAATTGCCGGCTCAACTGAAATACACGAGCAACCCTATTTAAATAAACGG…	GACGTTCTTTTTAGAAGTCCGACCCTTTCATTTTCTTACACTGTGCACACACTTCTTTTTTACACACACTTTTAACACCTTAGTATAAGAATGTAATAGTCTCTTTATTGAGCATAAATAAAATTAAAACTTTCAGCAACGGATCTCTTGGCTCTCGCATCGATGAAGAACGCAGCGAATTGCGATAAGTAATGTGAATTGCAGAATTCAGTGAATCATCGAATCTTTGAACGCACCTTGCACTCTTTGGTATTCCGAAGAGTATGTCTGTTTGAGTGTCATGAAACTCTCAACCCCCCTATTTTGTAATGAAATGGGCGTGGGCTTGGATTATGGTTGTCTGTCGGCGTAATTGCCGGCTCAACTGAAATACACGAGCAACCCTATTTAAATAAACGG…	Basidiomycota	Cystobasidiales	Cystobasidiaceae	Cystobasidium
94	B103	MT988240		AGCGCATTAGAAGCACCGCTTACTTTTGAAGAAGACGTCCTCAGCGAAATAATTATTACGCCGAGTCAAACCGTCTATTTCAAAGGGGTTGCTCGTGTATTTCAGTTGAGCCGGCAATTACGCAGACAACAACCATAATCCAAGCCCACACCCATCTCATTACAAAATAGGGGGGTTGAGAGTTTCATGACACTCAAACAGACATACTCTTCGGAATACCAAAGAGTGCAAGGTGCGTTCAAAGATTCGATGATTCACTGAATTCTGCAATTCACATTACTTATCGCAATTCGCTGCGTTCTTCATCGATGCGAGAGCCAAGAGATCCGTTGCTGAAAGTTTTATTTTTATTTATGCTCAATTAARAGACTGTTACATTCTTATACTAATGTGTTAAAA…	Cystobasidium sp.				491	0	488	3	0	0	AGCGCATTAGAAGCACCGCTTACTTTTGAAGAAGACGTCCTCAGCGAAATAATTATTACGCCGAGTCAAACCGTCTATTTCAAAGGGGTTGCTCGTGTATTTCAGTTGAGCCGGCAATTACGCAGACAACAACCATAATCCAAGCCCACACCCATCTCATTACAAAATAGGGGGGTTGAGAGTTTCATGACACTCAAACAGACATACTCTTCGGAATACCAAAGAGTGCAAGGTGCGTTCAAAGATTCGATGATTCACTGAATTCTGCAATTCACATTACTTATCGCAATTCGCTGCGTTCTTCATCGATGCGAGAGCCAAGAGATCCGTTGCTGAAAGTTTTATTTTTATTTATGCTCAATTAARAGACTGTTACATTCTTATACTAATGTGTTAAAA…	AGCGCATTAGAAGCACCGCTTACTTTTGAAGAAGACGTCCTCAGCGAAATAATTATTACGCCGAGTCAAACCGTCTATTTCAAAGGGGTTGCTCGTGTATTTCAGTTGAGCCGGCAATTACGCCGACAACAACCATAATCCAAGCCCACACCCATCTCATTACAAAATAGGGGGGTTGAGAGTTTCATGACACTCAAACAGACATACTCTTCGGAATACCAAAGAGTGCAAGGTGCGTTCAAAGATTCGATGATTCACTGAATTCTGCAATTCACATTACTTATCGCAATTCGCTGCGTTCTTCATCGATGCGAGAGCCAAGAGATCCGTTGCTGAAAGTTTTATTTTTATTTATGCTCAATTAAGAGACTGTTACATTCTTATACTAATGTGTTAAAA…	Basidiomycota	Cystobasidiales	Cystobasidiaceae	Cystobasidium
95	B106	MT988241	MH684593.1	TCTTCATCGATGCGAGAGCCAAGAGATCCGTTGCTGAAAGTTTTAATTTTATTTATGCTCAATAAAGAGACTATTACATTCTTATACTAAGGTGTTAAAAGTGTGTGTAAAAAAGAAGTGTGTGCACAGTGTAWKAAAATGAAAGGGTCGGACTTCTAAAMAGAACGTCCTAAAWTTCATTAATGATCCTTCCGCAGGTTCACCTACGGAA	Cystobasidium sp.	lowQ Seq	MH684593.1 Cystobasidium minutum strain GA25 small subunit ribosomal RNA gene, partial sequence; internal transcribed spacer 1 and 5.8S ribosomal RNA gene, complete sequence; and internal transcribed spacer 2, partial sequence	96.682	211	5.63e-98	204	7	0	0	TCTTCATCGATGCGAGAGCCAAGAGATCCGTTGCTGAAAGTTTTAATTTTATTTATGCTCAATAAAGAGACTATTACATTCTTATACTAAGGTGTTAAAAGTGTGTGTAAAAAAGAAGTGTGTGCACAGTGTAWKAAAATGAAAGGGTCGGACTTCTAAAMAGAACGTCCTAAAWTTCATTAATGATCCTTCCGCAGGTTCACCTACGGAA	TCTTCATCGATGCGAGAGCCAAGAGATCCGTTGCTGAAAGTTTTGTTTTTATTTATGCTCAATTAAGAGACTATTACATTCTTATACTAAGGTGTTAAAAGTGTGTGTAAAAAAGAAGTGTGTGCACAGTGTAAGAAAATGAAAGGGTCGGACTTCTAAAAAGAACGTCCTAAAATTCATTAATGATCCTTCCGCAGGTTCACCTACGGAA	Basidiomycota	Cystobasidiales	Cystobasidiaceae	Cystobasidium
96	B112	MT988242	KY103145.1	GTCCTTAGCGAAATAATTATTACGCCAAGTCAAACCGTTTATTTAAATAGGGTTGCTCGTGTATTTCAGTTGAGCCGGCAATTACGCCGACAGACAACCATAATCCAAGCCCACGCCCATTTCATTACAAAATAGGGGGGTTGAGAGTTTCATGACACTCAAACAGACATACTCTTCGGAATACCAAAGAGTGCAAGGTGCGTTCAAAGATTCGATGATTCACTGAATTCTGCAATTCACATTACTTATCGCAATTCGCTGCGTTCTTCATCGATGCGAGAGCCAAGAGATCCGTTGCTGAAAGTTTTATTTTTTTTTATGCTCAATAAAGAGACTATTACATTCTTATACTAAGGTGTTAAAAGTGTGTGTAAAAAAGAAGTGTGTGCACAGTGTAAG…	Cystobasidium sp.		KY103145.1 Cystobasidium minutum culture CBS:8019 small subunit ribosomal RNA gene, partial sequence; internal transcribed spacer 1, 5.8S ribosomal RNA gene, and internal transcribed spacer 2, complete sequence; and large subunit ribosomal RNA gene, partial sequence	98.812	505	0	499	6	0	0	GTCCTTAGCGAAATAATTATTACGCCAAGTCAAACCGTTTATTTAAATAGGGTTGCTCGTGTATTTCAGTTGAGCCGGCAATTACGCCGACAGACAACCATAATCCAAGCCCACGCCCATTTCATTACAAAATAGGGGGGTTGAGAGTTTCATGACACTCAAACAGACATACTCTTCGGAATACCAAAGAGTGCAAGGTGCGTTCAAAGATTCGATGATTCACTGAATTCTGCAATTCACATTACTTATCGCAATTCGCTGCGTTCTTCATCGATGCGAGAGCCAAGAGATCCGTTGCTGAAAGTTTTATTTTTTTTTATGCTCAATAAAGAGACTATTACATTCTTATACTAAGGTGTTAAAAGTGTGTGTAAAAAAGAAGTGTGTGCACAGTGTAAG…	GTCCTTAGCGAAATAATTATTACGCCAAGTCAAACCGTTTATTTCAATAGGGTTGCTCGTGTATTTCAGTTGAGCCGGCAATTACGCCGACAGACAACCATAATCCAAGCCCACACCCATCTCATTACAAAATAGGGGGGTTGAGAGTTTCATGACACTCAAACAGACATACTCTTCGGAATACCAAAGAGTGCAAGGTGCGTTCAAAGATTCGATGATTCACTGAATTCTGCAATTCACATTACTTATCGCAATTCGCTGCGTTCTTCATCGATGCGAGAGCCAAGAGATCCGTTGCTGAAAGTTTTGTTTTTATTTATGCTCAATTAAGAGACTATTACATTCTTATACTAAGGTGTTAAAAGTGTGTGTAAAAAAGAAGTGTGTGCACAGTGTAAG…	Basidiomycota	Cystobasidiales	Cystobasidiaceae	Cystobasidium
97	B120	MT988243	KX067831.1	AGTCGACCCTTTCATTTTCTTACACGTGTGGACACACACTTCTTTTTTACACACACTTTTAACACCTTAGTATAAGAATGTAATAGTCTCTTTATTGAGCATAAATAAAATTAAAACTTTCAGCAACGGATCTCTTGGCTCTCGCATCGATGAAGAACGCAGCGAATTGCGATAAGTAATGTGAATTGCAGAATTCAGTGAATCATCGAATCTTTGAACGCACCTTGCACTCTTTGGTATTCCGAAGAGTATGTCTGTTTGAGTGTCATGAAACTCTCAACCCCCCTATTTTGTAATGAAATGGGCGTGGGCTTGGATTATGGTTGTCTGTCGGCGTAATTGCCGGCTCAACTGAAATACACGAGCAACCCTATTGAAATAAACGGTTTGACTTGGCGT…	Cystobasidium sp.	lowQ Seq	KX067831.1 Cystobasidium slooffiae isolate RP314_6 internal transcribed spacer 1, partial sequence; 5.8S ribosomal RNA gene and internal transcribed spacer 2, complete sequence; and 28S ribosomal RNA gene, partial sequence	97.944	535	0	524	7	4	4	AGT-CGACCCTTTCATTTTCTTACACGTGTGGACACACACTTCTTTTTTACACACACTTTTAACACCTTAGTATAAGAATGTAATAGTCTCTTTATTGAGCATAAATAAAATTAAAACTTTCAGCAACGGATCTCTTGGCTCTCGCATCGATGAAGAACGCAGCGAATTGCGATAAGTAATGTGAATTGCAGAATTCAGTGAATCATCGAATCTTTGAACGCACCTTGCACTCTTTGGTATTCCGAAGAGTATGTCTGTTTGAGTGTCATGAAACTCTCAACCCCCCTATTTTGTAATGAAATGGGCGTGGGCTTGGATTATGGTTGTCTGTCGGCGTAATTGCCGGCTCAACTGAAATACACGAGCAACCCTATTGAAATAAACGGTTTGACTTGGCG…	AGTCCGACCCTTTCATTTTCTTACAC-TGT-G-CACACACTTCTTTTTTACACACACTTTTAACACCTTAGTATAAGAATGTAATAGTCTCTTTATTGAGCATAAATAAAATTAAAACTTTCAGCAACGGATCTCTTGGCTCTCGCATCGATGAAGAACGCAGCGAATTGCGATAAGTAATGTGAATTGCAGAATTCAGTGAATCATCGAATCTTTGAACGCACCTTGCACTCTTTGGTATTCCGAAGAGTATGTCTGTTTGAGTGTCATGAAACTCTCAACCCCCCTATTTTGTAATGAAATGGGCGTGGGCTTGGATTATGGTTGTCTGTCGGCGTAATTGCCGGCTCAACTGAAATACACGAGCAACCCTATTTAAATAAACGGTTTGACTTGGCG…	Basidiomycota	Cystobasidiales	Cystobasidiaceae	Cystobasidium
98	B135	MT988244	MH237664.1	TGAGGTCTAAGCTTATGATGTATAATACGCATTAGAAGCACCACTGACTTTWAAGAAGACGTCCTCAGCGAAATAATTATTACGCCGAGTCAAACCGTCTATTTCAAATGGGTTGCTCGTATATTTCAGTTGAGCCGACTTTACGCCGACAAACAACCATAATCCAAGCCCACGCCTGTCTCGTTACAAAACAGGGGGGTTGAGAGATTCATGACACTCAAACAGACATACTCTTCGGAATACCAAAGAGTGCAAGGTGCGTTCAAAGATTCGATGATTCACTGAATTCTGCAATTCACATTACTTATCGCAATTCGCTGCGTTCTTCATCGATGCGAGAGCCAAGAGATCCGTTGCTGAAAGTTTTATTATATATTTATGCTCAATTAAGAGACTGGT…	Cystobasidium sp.	lowQ Seq	MH237664.1 Cystobasidiomycetes sp. isolate R8 18S small subunit ribosomal RNA gene, partial sequence; internal transcribed spacer 1, 5.8S ribosomal RNA gene, and internal transcribed spacer 2, complete sequence; and 28S large subunit ribosomal RNA gene, partial sequence	99.255	537	0	533	4	0	0	TGAGGTCTAAGCTTATGATGTATAATACGCATTAGAAGCACCACTGACTTTWAAGAAGACGTCCTCAGCGAAATAATTATTACGCCGAGTCAAACCGTCTATTTCAAATGGGTTGCTCGTATATTTCAGTTGAGCCGACTTTACGCCGACAAACAACCATAATCCAAGCCCACGCCTGTCTCGTTACAAAACAGGGGGGTTGAGAGATTCATGACACTCAAACAGACATACTCTTCGGAATACCAAAGAGTGCAAGGTGCGTTCAAAGATTCGATGATTCACTGAATTCTGCAATTCACATTACTTATCGCAATTCGCTGCGTTCTTCATCGATGCGAGAGCCAAGAGATCCGTTGCTGAAAGTTTTATTATATATTTATGCTCAATTAAGAGACTGGT…	TGAGGTCTAAGCTTATGATGTATAATACGCATTAGAAGCACCACTGACTTTAAAGAAGACGTCCTCAGCGAAATAATTATTACGCCGAGTCAAACCGTCTATTTCAAATGGGTTGCTCGTATATTTCAGTTGAGCCGACTTTACGCCGACAGACAACCATAATCCAAGCCCACGCCTATCTCGTTACAAAACAGGGGGGTTGAGAGTTTCATGACACTCAAACAGACATACTCTTCGGAATACCAAAGAGTGCAAGGTGCGTTCAAAGATTCGATGATTCACTGAATTCTGCAATTCACATTACTTATCGCAATTCGCTGCGTTCTTCATCGATGCGAGAGCCAAGAGATCCGTTGCTGAAAGTTTTATTATATATTTATGCTCAATTAAGAGACTGGT…	Basidiomycota	Cystobasidiales	Cystobasidiaceae	Cystobasidium
99	B183	MT988246		TTTAGAGGTCCGACCCTTTCATTTCCTTACACTGTGCACACACTTCTTTTCACACATTTTAACACTATAGTATAAGAATGTAACAGTCTCTTTATTGAGCATAAATAAAAATAAAACTTTCAGCAACGGATCTCTTGGCTCTCGCATCGATGAAGAACGCAGCGAATTGCGATAAGTAATGTGAATTGCAGAATTCAGTGAATCATCGAATCTTTGAACGCACCTTGCACTCTTTGGTATTCCGAAGAGTATGTCTGTTTGAGTGTCATGAAACTCTCAACCCCCCTATTTTGTAATGAGATGGGCGTGGGCTTGGATTATGACTGCTGTCGGCGTAATTGCCGGCTCAGTTGAAATACACGAGCAACCCATTTGAAATAAACGGCTTGACTCGGCGTA…	Cystobasidium sp.				519	0	519	0	0	0	TTTAGAGGTCCGACCCTTTCATTTCCTTACACTGTGCACACACTTCTTTTCACACATTTTAACACTATAGTATAAGAATGTAACAGTCTCTTTATTGAGCATAAATAAAAATAAAACTTTCAGCAACGGATCTCTTGGCTCTCGCATCGATGAAGAACGCAGCGAATTGCGATAAGTAATGTGAATTGCAGAATTCAGTGAATCATCGAATCTTTGAACGCACCTTGCACTCTTTGGTATTCCGAAGAGTATGTCTGTTTGAGTGTCATGAAACTCTCAACCCCCCTATTTTGTAATGAGATGGGCGTGGGCTTGGATTATGACTGCTGTCGGCGTAATTGCCGGCTCAGTTGAAATACACGAGCAACCCATTTGAAATAAACGGCTTGACTCGGCGTA…	TTTAGAGGTCCGACCCTTTCATTTCCTTACACTGTGCACACACTTCTTTTCACACATTTTAACACTATAGTATAAGAATGTAACAGTCTCTTTATTGAGCATAAATAAAAATAAAACTTTCAGCAACGGATCTCTTGGCTCTCGCATCGATGAAGAACGCAGCGAATTGCGATAAGTAATGTGAATTGCAGAATTCAGTGAATCATCGAATCTTTGAACGCACCTTGCACTCTTTGGTATTCCGAAGAGTATGTCTGTTTGAGTGTCATGAAACTCTCAACCCCCCTATTTTGTAATGAGATGGGCGTGGGCTTGGATTATGACTGCTGTCGGCGTAATTGCCGGCTCAGTTGAAATACACGAGCAACCCATTTGAAATAAACGGCTTGACTCGGCGTA…	Basidiomycota	Cystobasidiales	Cystobasidiaceae	Cystobasidium
100	B184	MT988247	KX067831.1	TCTTTTTAGAGTCCGACCCTTTCATTTTCTTACACTGTGCACACACTTCTTTTTTACACACACTTTTAACACCTTAGTATAAGAATGTAATAGTCTCTTTATTGAGCATAAATAAAATTAAAACTTTCAGCAACGGATCTCTTGGCTCTCGCATCGATGAAGAACGCAGCGAATTGCGATAAGTAATGTGAATTGCAGAATTCAGTGAATCATCGAATCTTTGAACGCACCTTGCACTCTTTGGTATTCCGAAGAGTATGTCTGTTTGAGTGTCATGAAACTCTCAACCCCCCTATTTTGTAATGAAATGGGCGTGGGCTTGGATTATGGTTGTCTGTCGGCGTAATTGCCGGCTCAACTGAAATACACGAGCAACCCTATTTAAATAAACGGTTTGAC…	Cystobasidium sp.		KX067831.1 Cystobasidium slooffiae isolate RP314_6 internal transcribed spacer 1, partial sequence; 5.8S ribosomal RNA gene and internal transcribed spacer 2, complete sequence; and 28S ribosomal RNA gene, partial sequence	99.63	541	0	539	1	1	1	TCTTTTTAG-AGTCCGACCCTTTCATTTTCTTACACTGTGCACACACTTCTTTTTTACACACACTTTTAACACCTTAGTATAAGAATGTAATAGTCTCTTTATTGAGCATAAATAAAATTAAAACTTTCAGCAACGGATCTCTTGGCTCTCGCATCGATGAAGAACGCAGCGAATTGCGATAAGTAATGTGAATTGCAGAATTCAGTGAATCATCGAATCTTTGAACGCACCTTGCACTCTTTGGTATTCCGAAGAGTATGTCTGTTTGAGTGTCATGAAACTCTCAACCCCCCTATTTTGTAATGAAATGGGCGTGGGCTTGGATTATGGTTGTCTGTCGGCGTAATTGCCGGCTCAACTGAAATACACGAGCAACCCTATTTAAATAAACGGTTTGA…	TCTTTTTAGAAGTCCGACCCTTTCATTTTCTTACACTGTGCACACACTTCTTTTTTACACACACTTTTAACACCTTAGTATAAGAATGTAATAGTCTCTTTATTGAGCATAAATAAAATTAAAACTTTCAGCAACGGATCTCTTGGCTCTCGCATCGATGAAGAACGCAGCGAATTGCGATAAGTAATGTGAATTGCAGAATTCAGTGAATCATCGAATCTTTGAACGCACCTTGCACTCTTTGGTATTCCGAAGAGTATGTCTGTTTGAGTGTCATGAAACTCTCAACCCCCCTATTTTGTAATGAAATGGGCGTGGGCTTGGATTATGGTTGTCTGTCGGCGTAATTGCCGGCTCAACTGAAATACACGAGCAACCCTATTTAAATAAACGGTTTGA…	Basidiomycota	Cystobasidiales	Cystobasidiaceae	Cystobasidium
101	G1_001	MT988248	MH684593.1	TGATTTGAGGTCTAAGCTTAATGCTATTAGAAGCGAATTAGAAGCACCTCTTATATTTGAAGAAAACGTCCTTAGCGAAATAATTATTACGCCAAGTCAAACCGTTTATTTCAATAGGGTTGCTCGTGTATTTCAGTTGAGCCGGCAATTACGCCGACAGACAACCATAATCCAAGCCCACACCCATCTCATTACAAAATAGGGGGGTTGAGAGTTTCATGACACTCAAACAGACATACTCTTCGGAATACCAAAGAGTGCAAGGTGCGTTCAAAGATTCGATGATTCACTGAATTCTGCAATTCACATTACTTATCGCAATTCGCTGCGTTCTTCATCGATGCGAGAGCCAAGAGATCCGTTGCTGAAAGTTTTGTTTTTATTTATGCTCAATTAAGA…	Cystobasidium sp.		MH684593.1 Cystobasidium minutum strain GA25 small subunit ribosomal RNA gene, partial sequence; internal transcribed spacer 1 and 5.8S ribosomal RNA gene, complete sequence; and internal transcribed spacer 2, partial sequence	99.816	543	0	542	0	1	1	TGATTTGAGGTCTAAGCTTAATGCTATTAGAAGCGAATTAGAAGCACCTCTTATATTTGAAGAAAACGTCCTTAGCGAAATAATTATTACGCCAAGTCAAACCGTTTATTTCAATAGGGTTGCTCGTGTATTTCAGTTGAGCCGGCAATTACGCCGACAGACAACCATAATCCAAGCCCACACCCATCTCATTACAAAATAGGGGGGTTGAGAGTTTCATGACACTCAAACAGACATACTCTTCGGAATACCAAAGAGTGCAAGGTGCGTTCAAAGATTCGATGATTCACTGAATTCTGCAATTCACATTACTTATCGCAATTCGCTGCGTTCTTCATCGATGCGAGAGCCAAGAGATCCGTTGCTGAAAGTTTTGTTTTTATTTATGCTCAATTAAGA…	TGATTTGAGGTCTAAGCTTAATGCTATTAGAAGCGAATTAGAAGCACCTCTTATATTTGAAGAAAACGTCCTTAGCGAAATAATTATTACGCCAAGTCAAACCGTTTATTTCAATAGGGTTGCTCGTGTATTTCAGTTGAGCCGGCAATTACGCCGACAGACAACCATAATCCAAGCCCACACCCATCTCATTACAAAATAGGGGGGTTGAGAGTTTCATGACACTCAAACAGACATACTCTTCGGAATACCAAAGAGTGCAAGGTGCGTTCAAAGATTCGATGATTCACTGAATTCTGCAATTCACATTACTTATCGCAATTCGCTGCGTTCTTCATCGATGCGAGAGCCAAGAGATCCGTTGCTGAAAGTTTTGTTTTTATTTATGCTCAATTAAGA…	Basidiomycota	Cystobasidiales	Cystobasidiaceae	Cystobasidium
102	G1_006	MT988249	MH684593.1	TTTGAGGTCTAAGCTTAATGCGATTAGAAGCGAATTAGAAGCACCTCTTATATTTGAAGAAAACGTCCTTAGCGAAATAATTATTACGCCAAGTCAAACCGTTTATTTCAATAGGGTTGCTCGTGTATTTCAGTTGAGCCGGCAATTACGCCGACAGACAACCATAATCCAAGCCCACACCCATCTCATTACAAAATAGGGGGGTTGAGAGTTTCATGACACTCAAACAGACATACTCTTCGGAATACCAAAGAGTGCAAGGTGCGTTCAAAGATTCGATGATTCACTGAATTCTGCAATTCACATTACTTATCGCAATTCGCTGCGTTCTTCATCGATGCGAGAGCCAAGAGATCCGTTGCTGAAAGTTTTGTTTTTATTTATGCTCAATTAAGAGAC…	Cystobasidium sp.		MH684593.1 Cystobasidium minutum strain GA25 small subunit ribosomal RNA gene, partial sequence; internal transcribed spacer 1 and 5.8S ribosomal RNA gene, complete sequence; and internal transcribed spacer 2, partial sequence	99.814	539	0	538	1	0	0	TTTGAGGTCTAAGCTTAATGCGATTAGAAGCGAATTAGAAGCACCTCTTATATTTGAAGAAAACGTCCTTAGCGAAATAATTATTACGCCAAGTCAAACCGTTTATTTCAATAGGGTTGCTCGTGTATTTCAGTTGAGCCGGCAATTACGCCGACAGACAACCATAATCCAAGCCCACACCCATCTCATTACAAAATAGGGGGGTTGAGAGTTTCATGACACTCAAACAGACATACTCTTCGGAATACCAAAGAGTGCAAGGTGCGTTCAAAGATTCGATGATTCACTGAATTCTGCAATTCACATTACTTATCGCAATTCGCTGCGTTCTTCATCGATGCGAGAGCCAAGAGATCCGTTGCTGAAAGTTTTGTTTTTATTTATGCTCAATTAAGAGAC…	TTTGAGGTCTAAGCTTAATGCTATTAGAAGCGAATTAGAAGCACCTCTTATATTTGAAGAAAACGTCCTTAGCGAAATAATTATTACGCCAAGTCAAACCGTTTATTTCAATAGGGTTGCTCGTGTATTTCAGTTGAGCCGGCAATTACGCCGACAGACAACCATAATCCAAGCCCACACCCATCTCATTACAAAATAGGGGGGTTGAGAGTTTCATGACACTCAAACAGACATACTCTTCGGAATACCAAAGAGTGCAAGGTGCGTTCAAAGATTCGATGATTCACTGAATTCTGCAATTCACATTACTTATCGCAATTCGCTGCGTTCTTCATCGATGCGAGAGCCAAGAGATCCGTTGCTGAAAGTTTTGTTTTTATTTATGCTCAATTAAGAGAC…	Basidiomycota	Cystobasidiales	Cystobasidiaceae	Cystobasidium
103	G1_007	MT988250	MH684593.1	AAGCTTAGTGCGAGTATAAGCGAATTAGAAGCACCTCTTATATTTGAAGAAAACGTCCTTAGCGAAATAATTATTACGCCAAGTCAAACCGTTTATTTCAATAGGGTTGCTCGTGTATTTCAGTTGAGCCGGCAATTACGCCGACAGACAACCATAATCCAAGCCCACACCCATCTCATTACAAAATAGGGGGGTTGAGAGTTTCATGACACTCAAACAGACATACTCTTCGGAATACCAAAGAGTGCAAGGTGCGTTCAAAGATTCGATGATTCACTGAATTCTGCAATTCACATTACTTATCGCAATTCGCTGCGTTCTTCATCGATGCGAGAGCCAAGAGATCCGTTGCTGAAAGTTTTGTTTTTATTTATGCTCAATTAAGAGACTATTACATTC…	Cystobasidium sp.		MH684593.1 Cystobasidium minutum strain GA25 small subunit ribosomal RNA gene, partial sequence; internal transcribed spacer 1 and 5.8S ribosomal RNA gene, complete sequence; and internal transcribed spacer 2, partial sequence	99.244	529	0	525	4	0	0	AAGCTTAGTGCGAGTATAAGCGAATTAGAAGCACCTCTTATATTTGAAGAAAACGTCCTTAGCGAAATAATTATTACGCCAAGTCAAACCGTTTATTTCAATAGGGTTGCTCGTGTATTTCAGTTGAGCCGGCAATTACGCCGACAGACAACCATAATCCAAGCCCACACCCATCTCATTACAAAATAGGGGGGTTGAGAGTTTCATGACACTCAAACAGACATACTCTTCGGAATACCAAAGAGTGCAAGGTGCGTTCAAAGATTCGATGATTCACTGAATTCTGCAATTCACATTACTTATCGCAATTCGCTGCGTTCTTCATCGATGCGAGAGCCAAGAGATCCGTTGCTGAAAGTTTTGTTTTTATTTATGCTCAATTAAGAGACTATTACATTC…	AAGCTTAATGCTATTAGAAGCGAATTAGAAGCACCTCTTATATTTGAAGAAAACGTCCTTAGCGAAATAATTATTACGCCAAGTCAAACCGTTTATTTCAATAGGGTTGCTCGTGTATTTCAGTTGAGCCGGCAATTACGCCGACAGACAACCATAATCCAAGCCCACACCCATCTCATTACAAAATAGGGGGGTTGAGAGTTTCATGACACTCAAACAGACATACTCTTCGGAATACCAAAGAGTGCAAGGTGCGTTCAAAGATTCGATGATTCACTGAATTCTGCAATTCACATTACTTATCGCAATTCGCTGCGTTCTTCATCGATGCGAGAGCCAAGAGATCCGTTGCTGAAAGTTTTGTTTTTATTTATGCTCAATTAAGAGACTATTACATTC…	Basidiomycota	Cystobasidiales	Cystobasidiaceae	Cystobasidium
104	G1_008	MT988251	MH684593.1	TGATTTGAGGTCTAAGCTTAGTGCTATTAAAGCGAATTAGAAGCACCTCTTATATTTGAAGAAAACGTCCTTAGCGAAATAATTATTACGCCAAGTCAAACCGTTTATTTCAATAGGGTTGCTCGTGTATTTCAGTTGAGCCGGCAATTACGCCGACAGACAACCATAATCCAAGCCCACACCCATCTCATTACAAAATAGGGGGGTTGAGAGTTTCATGACACTCAAACAGACATACTCTTCGGAATACCAAAGAGTGCAAGGTGCGTTCAAAGATTCGATGATTCACTGAATTCTGCAATTCACATTACTTATCGCAATTCGCTGCGTTCTTCATCGATGCGAGAGCCAAGAGATCCGTTGCTGAAAGTTTTGTTTTTATTTATGCTCAATTAAGAG…	Cystobasidium sp.		MH684593.1 Cystobasidium minutum strain GA25 small subunit ribosomal RNA gene, partial sequence; internal transcribed spacer 1 and 5.8S ribosomal RNA gene, complete sequence; and internal transcribed spacer 2, partial sequence	99.631	542	0	540	1	1	1	TGATTTGAGGTCTAAGCTTAGTGCTATTA-AAGCGAATTAGAAGCACCTCTTATATTTGAAGAAAACGTCCTTAGCGAAATAATTATTACGCCAAGTCAAACCGTTTATTTCAATAGGGTTGCTCGTGTATTTCAGTTGAGCCGGCAATTACGCCGACAGACAACCATAATCCAAGCCCACACCCATCTCATTACAAAATAGGGGGGTTGAGAGTTTCATGACACTCAAACAGACATACTCTTCGGAATACCAAAGAGTGCAAGGTGCGTTCAAAGATTCGATGATTCACTGAATTCTGCAATTCACATTACTTATCGCAATTCGCTGCGTTCTTCATCGATGCGAGAGCCAAGAGATCCGTTGCTGAAAGTTTTGTTTTTATTTATGCTCAATTAAGA…	TGATTTGAGGTCTAAGCTTAATGCTATTAGAAGCGAATTAGAAGCACCTCTTATATTTGAAGAAAACGTCCTTAGCGAAATAATTATTACGCCAAGTCAAACCGTTTATTTCAATAGGGTTGCTCGTGTATTTCAGTTGAGCCGGCAATTACGCCGACAGACAACCATAATCCAAGCCCACACCCATCTCATTACAAAATAGGGGGGTTGAGAGTTTCATGACACTCAAACAGACATACTCTTCGGAATACCAAAGAGTGCAAGGTGCGTTCAAAGATTCGATGATTCACTGAATTCTGCAATTCACATTACTTATCGCAATTCGCTGCGTTCTTCATCGATGCGAGAGCCAAGAGATCCGTTGCTGAAAGTTTTGTTTTTATTTATGCTCAATTAAGA…	Basidiomycota	Cystobasidiales	Cystobasidiaceae	Cystobasidium
105	G2_019_01	MT988252	MK267900.1	GTCGTGACTGATTTGAGGTCTAAAGCTTAAATGCTATTAGAAGCGAATTAGAAGCACCTCTTATATTTGAAGAAAACGTCCTTAGCGAAATAATTATTACGCCAAGTCAAACCGTTTATTTCAATAGGGTTGCTCGTGTATTTCAGTTGAGCCGGCAATTACGCCGACAGACAACCATAATCCAAGCCCACACCCATCTCATTACAAAATAGGGGGGTTGAGAGTTTCATGACACTCAAACAGACATACTCTTCGGAATACCAAAGAGTGCAAGGTGCGTTCAAAGATTCGATGATTCACTGAATTCTGCAATTCACATTACTTATCGCAATTCGCTGCGTTCTTCATCGATGCGAGAGCCAAGAGATCCGTTGCTGAAAGTTTTGTTTTTATTTATGC…	Cystobasidium sp.		MK267900.1 Cystobasidium slooffiae isolate R96651_ITS small subunit ribosomal RNA gene, partial sequence; internal transcribed spacer 1, 5.8S ribosomal RNA gene, and internal transcribed spacer 2, complete sequence; and large subunit ribosomal RNA gene, partial sequence	99.456	551	0	548	3	0	0	GTCGTGACTGATTTGAGGTCTAAAGCTTAAATGCTATTAGAAGCGAATTAGAAGCACCTCTTATATTTGAAGAAAACGTCCTTAGCGAAATAATTATTACGCCAAGTCAAACCGTTTATTTCAATAGGGTTGCTCGTGTATTTCAGTTGAGCCGGCAATTACGCCGACAGACAACCATAATCCAAGCCCACACCCATCTCATTACAAAATAGGGGGGTTGAGAGTTTCATGACACTCAAACAGACATACTCTTCGGAATACCAAAGAGTGCAAGGTGCGTTCAAAGATTCGATGATTCACTGAATTCTGCAATTCACATTACTTATCGCAATTCGCTGCGTTCTTCATCGATGCGAGAGCCAAGAGATCCGTTGCTGAAAGTTTTGTTTTTATTTATGC…	GTCCTGACTGATTTGAGGTCTAAAGCTTAAATGCTATTAGAAGCGAATTAGAAGCACCTCTTATATTTGAAGAAAACGTCCTTAGCGAAATAATTATTACGCCAAGTCAAACCGTTTATTTCAATAGGGTTGCTCGTGTATTTCAGTTGAGCCGGCAATTACGCCGACAGACAACCATAATCCAAGCCCACACCCATCTCATTACAAAATAGGGGGGTTGAGAGTTTCATGACACTCAAACAGACATACTCTTCGGAATACCAAAGAGTGCAAGGTGCGTTCAAAGATTCGATGATTCACTGAATTCTGCAATTCACATTACTTATCGCAATTCGCTGCGTTCTTCATCGATGCGAGAGCCAAGAGATCCGTTGCTGAAAGTTTTGTTTTTATTTATGC…	Basidiomycota	Cystobasidiales	Cystobasidiaceae	Cystobasidium
106	G2_019_02	MT988253	KX067831.1	TGACTGATTTGAGGTCTAAAGCTTAAATGCTATAAAAGCGAATTAGTAGCACCTCTTATATTTTAAGAAAACGTCCTTAGCGAAATAACTATTACGCCAAGTCAAACCGTTTATTTAAATAGGGTTGCTCGTGTATTTCAGTTGAGCCGGCAATTACGCCGACAGACAACCATAATCCAAGCCCACGCCCATTTCATTACAAAATAGGGGGGTTGAGAGTTTCATGACACTCAAACAGACATACTCTTCGGAATACCAAAGAGTGCAAGGTGCGTTCAAAGATTCGATGATTCACTGAATTCTGCAATTCACATTACTTATCGCAATTCGCTGCGTTCTTCATCGATGCGAGAGCCAAGAGATCCGTTGCTGAAAGTTTTAATTTTATTTATGCTCAAT…	Cystobasidium sp.	lowQ Seq	KX067831.1 Cystobasidium slooffiae isolate RP314_6 internal transcribed spacer 1, partial sequence; 5.8S ribosomal RNA gene and internal transcribed spacer 2, complete sequence; and 28S ribosomal RNA gene, partial sequence	99.259	540	0	536	1	3	3	TGACTGATTTGAGGTCTAAAGCTTAAATGCTATAAAAGCGAATTAGTAGCACCTCTTATATTTTAAGAAAACGTCCTTAGCGAAATAACTATTACGCCAAGTCAAACCGTTTATTTAAATAGGGTTGCTCGTGTATTTCAGTTGAGCCGGCAATTACGCCGACAGACAACCATAATCCAAGCCCACGCCCATTTCATTACAAAATAGGGGGGTTGAGAGTTTCATGACACTCAAACAGACATACTCTTCGGAATACCAAAGAGTGCAAGGTGCGTTCAAAGATTCGATGATTCACTGAATTCTGCAATTCACATTACTTATCGCAATTCGCTGCGTTCTTCATCGATGCGAGAGCCAAGAGATCCGTTGCTGAAAGTTTTAATTTTATTTATGCTCAAT…	TGACTGATTTGAGGTCTAAAGCTTAAATGCTATAAAAGCGAATTAGTAGCACCTCTTATATTTTAAGAAAACGTCCTTAGCGAAATAATTATTACGCCAAGTCAAACCGTTTATTTAAATAGGGTTGCTCGTGTATTTCAGTTGAGCCGGCAATTACGCCGACAGACAACCATAATCCAAGCCCACGCCCATTTCATTACAAAATAGGGGGGTTGAGAGTTTCATGACACTCAAACAGACATACTCTTCGGAATACCAAAGAGTGCAAGGTGCGTTCAAAGATTCGATGATTCACTGAATTCTGCAATTCACATTACTTATCGCAATTCGCTGCGTTCTTCATCGATGCGAGAGCCAAGAGATCCGTTGCTGAAAGTTTTAATTTTATTTATGCTCAAT…	Basidiomycota	Cystobasidiales	Cystobasidiaceae	Cystobasidium
107	G2_032_01	MT988254	MK267900.1	GAGGTCTAAAGCTTAAATGCTATTAGAAGCGAATTAGAAGCACCTCTTATATTTGAAGAAAACGTCCTTAGCGAAATAATTATTACGCCAAGTCAAACCGTTTATTTCAATAGGGTTGCTCGTGTATTTCAGTTGAGCCGGCAATTACGCCGACAGACAACCATAATCCAAGCCCACACCCATCTCATTACAAAATAGGGGGGTTGAGAGTTTCATGACACTCAAACAGACATACTCTTCGGAATACCAAAGAGTGCAAGGTGCGTTCAAAGATTCGATGATTCACTGAATTCTGCAATTCACATTACTTATCGCAATTCGCTGCGTTCTTCATCGATGCGAGAGCCAAGAGATCCGTTGCTGAAAGTTTTGTTTTTATTTATGCTCAATTAAGAGACT…	Cystobasidium sp.		MK267900.1 Cystobasidium slooffiae isolate R96651_ITS small subunit ribosomal RNA gene, partial sequence; internal transcribed spacer 1, 5.8S ribosomal RNA gene, and internal transcribed spacer 2, complete sequence; and large subunit ribosomal RNA gene, partial sequence	100	525	0	525	0	0	0	GAGGTCTAAAGCTTAAATGCTATTAGAAGCGAATTAGAAGCACCTCTTATATTTGAAGAAAACGTCCTTAGCGAAATAATTATTACGCCAAGTCAAACCGTTTATTTCAATAGGGTTGCTCGTGTATTTCAGTTGAGCCGGCAATTACGCCGACAGACAACCATAATCCAAGCCCACACCCATCTCATTACAAAATAGGGGGGTTGAGAGTTTCATGACACTCAAACAGACATACTCTTCGGAATACCAAAGAGTGCAAGGTGCGTTCAAAGATTCGATGATTCACTGAATTCTGCAATTCACATTACTTATCGCAATTCGCTGCGTTCTTCATCGATGCGAGAGCCAAGAGATCCGTTGCTGAAAGTTTTGTTTTTATTTATGCTCAATTAAGAGACT…	GAGGTCTAAAGCTTAAATGCTATTAGAAGCGAATTAGAAGCACCTCTTATATTTGAAGAAAACGTCCTTAGCGAAATAATTATTACGCCAAGTCAAACCGTTTATTTCAATAGGGTTGCTCGTGTATTTCAGTTGAGCCGGCAATTACGCCGACAGACAACCATAATCCAAGCCCACACCCATCTCATTACAAAATAGGGGGGTTGAGAGTTTCATGACACTCAAACAGACATACTCTTCGGAATACCAAAGAGTGCAAGGTGCGTTCAAAGATTCGATGATTCACTGAATTCTGCAATTCACATTACTTATCGCAATTCGCTGCGTTCTTCATCGATGCGAGAGCCAAGAGATCCGTTGCTGAAAGTTTTGTTTTTATTTATGCTCAATTAAGAGACT…	Basidiomycota	Cystobasidiales	Cystobasidiaceae	Cystobasidium
108	G2_032_02	MT988255	AB078491.1	TGATTTGAGGTCTAAAGCTTAAATGCTATTAGAAGCGAATTAGAAGCACCTCTTATATTTGAAGAAAACGTCCTTAGCGAAATAATTATTACGCCAAGTCAAACCGTTTATTTCAATAGGGTTGCTCGTGTATTTCAGTTGAGCCGGCAATTACGCCGACAGACAACCATAATCCAAGCCCACACCCATCTCATTACAAAATAGGGGGGTTGAGAGTTTCATGACACTCAAACAGACATACTCTTCGGAATACCAAAGAGTGCAAGGTGCGTTCAAAGATTCGATGATTCACTGAATTCTGCAATTCACATTACTTATCGCAATTCGCTGCGTTCTTCATCGATGCGAGAGCCAAGAGATCCGTTGCTGAAAGTTTTGTTTTTATTTATGCTCAATTAA…	Cystobasidium sp.		AB078491.1 Cystobasidium slooffiae genes for 18S rRNA, ITS1, 5.8S rRNA, ITS2, 26S rRNA, partial and complete sequences, strain:JCM 3779	99.811	530	0	529	0	1	1	TGATTTGAGGTCTAAAGCTTAAATGCTATTAGAAGCGAATTAGAAGCACCTCTTATATTTGAAGAAAACGTCCTTAGCGAAATAATTATTACGCCAAGTCAAACCGTTTATTTCAATAGGGTTGCTCGTGTATTTCAGTTGAGCCGGCAATTACGCCGACAGACAACCATAATCCAAGCCCACACCCATCTCATTACAAAATAGGGGGGTTGAGAGTTTCATGACACTCAAACAGACATACTCTTCGGAATACCAAAGAGTGCAAGGTGCGTTCAAAGATTCGATGATTCACTGAATTCTGCAATTCACATTACTTATCGCAATTCGCTGCGTTCTTCATCGATGCGAGAGCCAAGAGATCCGTTGCTGAAAGTTTTGTTTTTATTTATGCTCAATTAA…	TGATTTGAGGTCTAAAGCTTAAATGCTATTAGAAGCGAATTAGAAGCACCTCTTATATTTGAAGAAAACGTCCTTAGCGAAATAATTATTACGCCAAGTCAAACCGTTTATTTCAATAGGGTTGCTCGTGTATTTCAGTTGAGCCGGCAATTACGCCGACAGACAACCATAATCCAAGCCCACACCCATCTCATTACAAAATAGGGGGGTTGAGAGTTTCATGACACTCAAACAGACATACTCTTCGGAATACCAAAGAGTGCAAGGTGCGTTCAAAGATTCGATGATTCACTGAATTCTGCAATTCACATTACTTATCGCAATTCGCTGCGTTCTTCATCGATGCGAGAGCCAAGAGATCCGTTGCTGAAAGTTTTGTTTTTATTTATGCTCAATTAA…	Basidiomycota	Cystobasidiales	Cystobasidiaceae	Cystobasidium
109	G2_049_02	MT988256	NR_154833.1	CCTCTAACTTTTGAAGAAAACGTCCTCAGCGAAATAATTATTACGCCGAGTCAAGCCGTTTATTTCAAATGGGTTGCTCGTGTATTTCAACTGAGCCGGCAATTACGCCGACAGCAGTCATAATCCAAGCCCACGCCCATCTCATTACAAAATAGGGGGGTTGAGAGTTTCATGACACTCAAACAGACATACTCTTCGGAATACCAAAGAGTGCAAGGTGCGTTCAAAGATTCGATGATTCACTGAATTCTGCAATTCACATTACTTATCGCAATTCGCTGCGTTCTTCATCGATGCGAGAGCCAAGAGATCCGTTGCTGAAAGTTTTATTTTTATTTATGCTCAATAAAGAGACTGTTACATTCTTATACTATAGTGTTAAAATGTGTGAAAAGAAGT…	Cystobasidium sp.		NR_154833.1 Cystobasidium laryngis CBS 2221 ITS region; from TYPE material	100	491	0	491	0	0	0	CCTCTAACTTTTGAAGAAAACGTCCTCAGCGAAATAATTATTACGCCGAGTCAAGCCGTTTATTTCAAATGGGTTGCTCGTGTATTTCAACTGAGCCGGCAATTACGCCGACAGCAGTCATAATCCAAGCCCACGCCCATCTCATTACAAAATAGGGGGGTTGAGAGTTTCATGACACTCAAACAGACATACTCTTCGGAATACCAAAGAGTGCAAGGTGCGTTCAAAGATTCGATGATTCACTGAATTCTGCAATTCACATTACTTATCGCAATTCGCTGCGTTCTTCATCGATGCGAGAGCCAAGAGATCCGTTGCTGAAAGTTTTATTTTTATTTATGCTCAATAAAGAGACTGTTACATTCTTATACTATAGTGTTAAAATGTGTGAAAAGAAGT…	CCTCTAACTTTTGAAGAAAACGTCCTCAGCGAAATAATTATTACGCCGAGTCAAGCCGTTTATTTCAAATGGGTTGCTCGTGTATTTCAACTGAGCCGGCAATTACGCCGACAGCAGTCATAATCCAAGCCCACGCCCATCTCATTACAAAATAGGGGGGTTGAGAGTTTCATGACACTCAAACAGACATACTCTTCGGAATACCAAAGAGTGCAAGGTGCGTTCAAAGATTCGATGATTCACTGAATTCTGCAATTCACATTACTTATCGCAATTCGCTGCGTTCTTCATCGATGCGAGAGCCAAGAGATCCGTTGCTGAAAGTTTTATTTTTATTTATGCTCAATAAAGAGACTGTTACATTCTTATACTATAGTGTTAAAATGTGTGAAAAGAAGT…	Basidiomycota	Cystobasidiales	Cystobasidiaceae	Cystobasidium
110	G2_054_01	MT988257	MH380197.1	ATAAAAGGCGCATTACAAACACCTCTTACTTTTGAAGAAAACGTCCTCAGCGAAATAATTATTACGCCGAGTCAAGCCGTTTATTTCAAATGGGTTGCTCGTGTATTTCAACTGAGCCGGCAATTACGCCGACAGCAGTCATAATCCAAGCCCACGCCCATCTCATTACAAAATAGGGGGGTTGAGAGTTTCATGACACTCAAACAGACATACTCTTCGGAATACCAAAGAGTGCAAGGTGCGTTCAAAGATTCGATGATTCACTGAATTCTGCAATTCACATTACTTATCGCAATTCGCTGCGTTCTTCATCGATGCGAGAGCCAAGAGATCCGTTGCTGAAAGTTTTATTTTTATTTATGCTCAATAAAGAGACTGTTACATTCTTATACTATAGTG…	Cystobasidium sp.		MH380197.1 Cystobasidium pinicola strain ICMP 2924 small subunit ribosomal RNA gene, partial sequence; internal transcribed spacer 1, 5.8S ribosomal RNA gene, and internal transcribed spacer 2, complete sequence; and large subunit ribosomal RNA gene, partial sequence	99.414	512	0	509	2	1	1	ATAAAAGGCGCATTACAAACACCTCTTACTTTTGAAGAAAACGTCCTCAGCGAAATAATTATTACGCCGAGTCAAGCCGTTTATTTCAAATGGGTTGCTCGTGTATTTCAACTGAGCCGGCAATTACGCCGACAGCAGTCATAATCCAAGCCCACGCCCATCTCATTACAAAATAGGGGGGTTGAGAGTTTCATGACACTCAAACAGACATACTCTTCGGAATACCAAAGAGTGCAAGGTGCGTTCAAAGATTCGATGATTCACTGAATTCTGCAATTCACATTACTTATCGCAATTCGCTGCGTTCTTCATCGATGCGAGAGCCAAGAGATCCGTTGCTGAAAGTTTTATTTTTATTTATGCTCAATAAAGAGACTGTTACATTCTTATACTATAGTG…	ATAAAA-GCGCATTAGAAGCACCTCTTACTTTTGAAGAAAACGTCCTCAGCGAAATAATTATTACGCCGAGTCAAGCCGTTTATTTCAAATGGGTTGCTCGTGTATTTCAACTGAGCCGGCAATTACGCCGACAGCAGTCATAATCCAAGCCCACGCCCATCTCATTACAAAATAGGGGGGTTGAGAGTTTCATGACACTCAAACAGACATACTCTTCGGAATACCAAAGAGTGCAAGGTGCGTTCAAAGATTCGATGATTCACTGAATTCTGCAATTCACATTACTTATCGCAATTCGCTGCGTTCTTCATCGATGCGAGAGCCAAGAGATCCGTTGCTGAAAGTTTTATTTTTATTTATGCTCAATAAAGAGACTGTTACATTCTTATACTATAGTG…	Basidiomycota	Cystobasidiales	Cystobasidiaceae	Cystobasidium
111	G2_066_01	MT988258	MH380197.1	GCGCAGCTAGAAACACCTCTTACTTTTGAAGAAAACGTCCTCAGCGAAATAATTATTACGCCGAGTCAAGCCGTTTATTTCAAATGGGTTGCTCGTGTATTTCAACTGAGCCGGCAATTACGCCGACAGCAGTCATAATCCAAGCCCACGCCCATCTCATTACAAAATAGGGGGGTTGAGAGTTTCATGACACTCAAACAGACATACTCTTCGGAATACCAAAGAGTGCAAGGTGCGTTCAAAGATTCGATGATTCACTGAATTCTGCAATTCACATTACTTATCGCAATTCGCTGCGTTCTTCATCGATGCGAGAGCCAAGAGATCCGTTGCTGAAAGTTTTATTTTTATTTATGCTCAATAAAGAGACTGTTACATTCTTATACTATAGTGTTAAAA…	Cystobasidium sp.		MH380197.1 Cystobasidium pinicola strain ICMP 2924 small subunit ribosomal RNA gene, partial sequence; internal transcribed spacer 1, 5.8S ribosomal RNA gene, and internal transcribed spacer 2, complete sequence; and large subunit ribosomal RNA gene, partial sequence	99.408	507	0	504	2	1	1	GCGCAGCTAGAAACACCTCTTACTTTTGAAGAAAACGTCCTCAGCGAAATAATTATTACGCCGAGTCAAGCCGTTTATTTCAAATGGGTTGCTCGTGTATTTCAACTGAGCCGGCAATTACGCCGACAGCAGTCATAATCCAAGCCCACGCCCATCTCATTACAAAATAGGGGGGTTGAGAGTTTCATGACACTCAAACAGACATACTCTTCGGAATACCAAAGAGTGCAAGGTGCGTTCAAAGATTCGATGATTCACTGAATTCTGCAATTCACATTACTTATCGCAATTCGCTGCGTTCTTCATCGATGCGAGAGCCAAGAGATCCGTTGCTGAAAGTTTTATTTTTATTTATGCTCAATAAAGAGACTGTTACATTCTTATACTATAGTGTTAAAA…	GCGCA-TTAGAAGCACCTCTTACTTTTGAAGAAAACGTCCTCAGCGAAATAATTATTACGCCGAGTCAAGCCGTTTATTTCAAATGGGTTGCTCGTGTATTTCAACTGAGCCGGCAATTACGCCGACAGCAGTCATAATCCAAGCCCACGCCCATCTCATTACAAAATAGGGGGGTTGAGAGTTTCATGACACTCAAACAGACATACTCTTCGGAATACCAAAGAGTGCAAGGTGCGTTCAAAGATTCGATGATTCACTGAATTCTGCAATTCACATTACTTATCGCAATTCGCTGCGTTCTTCATCGATGCGAGAGCCAAGAGATCCGTTGCTGAAAGTTTTATTTTTATTTATGCTCAATAAAGAGACTGTTACATTCTTATACTATAGTGTTAAAA…	Basidiomycota	Cystobasidiales	Cystobasidiaceae	Cystobasidium
112	G2_073_03-2	MT988260	NR_154834.1	GACTGATTTGAGGTCTAAAATATAAATGCTATAAAAGCGCATTAGAAGCACCTCTTACTTTTGAAGAAAACGTCCTCAGCGAAATAATTATTACGCCGAGTCAAGCCGTTTATTTCAAATGGGTTGCTCGTGTATTTCAACTGAGCCGGCAATTACGCCGACAGCAGTCATAATCCAAGCCCACGCCCATCTCATTACAAAATAGGGGGGTTGAGAGTTTCATGACACTCAAACAGACATACTCTTCGGAATACCAAAGAGTGCAAGGTGCGTTCAAAGATTCGATGATTCACTGAATTCTGCAATTCACATTACTTATCGCAATTCGCTGCGTTCTTCATCGATGCGAGAGCCAAGAGATCCGTTGCTGAAAGTTTTATTTTTATTTATGCTCAATAA…	Cystobasidium sp.		NR_154834.1 Cystobasidium pinicola CBS 9130 ITS region; from TYPE material >KY103147.1 Cystobasidium pinicola culture CBS:9130 small subunit ribosomal RNA gene, partial sequence; internal transcribed spacer 1, 5.8S ribosomal RNA gene, and internal transcribed spacer 2, complete sequence; and large subunit ribosomal RNA gene, partial sequence	100	542	0	542	0	0	0	GACTGATTTGAGGTCTAAAATATAAATGCTATAAAAGCGCATTAGAAGCACCTCTTACTTTTGAAGAAAACGTCCTCAGCGAAATAATTATTACGCCGAGTCAAGCCGTTTATTTCAAATGGGTTGCTCGTGTATTTCAACTGAGCCGGCAATTACGCCGACAGCAGTCATAATCCAAGCCCACGCCCATCTCATTACAAAATAGGGGGGTTGAGAGTTTCATGACACTCAAACAGACATACTCTTCGGAATACCAAAGAGTGCAAGGTGCGTTCAAAGATTCGATGATTCACTGAATTCTGCAATTCACATTACTTATCGCAATTCGCTGCGTTCTTCATCGATGCGAGAGCCAAGAGATCCGTTGCTGAAAGTTTTATTTTTATTTATGCTCAATAA…	GACTGATTTGAGGTCTAAAATATAAATGCTATAAAAGCGCATTAGAAGCACCTCTTACTTTTGAAGAAAACGTCCTCAGCGAAATAATTATTACGCCGAGTCAAGCCGTTTATTTCAAATGGGTTGCTCGTGTATTTCAACTGAGCCGGCAATTACGCCGACAGCAGTCATAATCCAAGCCCACGCCCATCTCATTACAAAATAGGGGGGTTGAGAGTTTCATGACACTCAAACAGACATACTCTTCGGAATACCAAAGAGTGCAAGGTGCGTTCAAAGATTCGATGATTCACTGAATTCTGCAATTCACATTACTTATCGCAATTCGCTGCGTTCTTCATCGATGCGAGAGCCAAGAGATCCGTTGCTGAAAGTTTTATTTTTATTTATGCTCAATAA…	Basidiomycota	Cystobasidiales	Cystobasidiaceae	Cystobasidium
113	G2_079_02	MT988261	KX067831.1	TGACTGATTTGAGGTCTAAAGCTTAAATGCTATAATAGCGAATTAGTAGCACCTCTTATATTTAAGAAAACGTCCTTAGCGAAATAATTATTACGCCAAGTCAAACCGTTTATTTAAATAGGGTTGCTCGTGTATTTCAGTTGAGCCGGCAATTACGCCGACAGACAACCATAATCCAAGCCCACGCCCATTTCATTACAAAATAGGGGGGTTGAGAGTTTCATGACACTCAAACAGACATACTCTTCGGAATACCAAAGAGTGCAAGGTGCGTTCAAAGATTCGATGATTCACTGAATTCTGCAATTCACATTACTTATCGCAATTCGCTGCGTTCTTCATCGATGCGAGAGCCAAGAGATCCGTTGCTGAAAGTTTTAATTTTATTTATGCTCAATA…	Cystobasidium sp.		KX067831.1 Cystobasidium slooffiae isolate RP314_6 internal transcribed spacer 1, partial sequence; 5.8S ribosomal RNA gene and internal transcribed spacer 2, complete sequence; and 28S ribosomal RNA gene, partial sequence	99.436	532	0	529	1	2	2	TGACTGATTTGAGGTCTAAAGCTTAAATGCTATAATAGCGAATTAGTAGCACCTCTTATATTT-AAGAAAACGTCCTTAGCGAAATAATTATTACGCCAAGTCAAACCGTTTATTTAAATAGGGTTGCTCGTGTATTTCAGTTGAGCCGGCAATTACGCCGACAGACAACCATAATCCAAGCCCACGCCCATTTCATTACAAAATAGGGGGGTTGAGAGTTTCATGACACTCAAACAGACATACTCTTCGGAATACCAAAGAGTGCAAGGTGCGTTCAAAGATTCGATGATTCACTGAATTCTGCAATTCACATTACTTATCGCAATTCGCTGCGTTCTTCATCGATGCGAGAGCCAAGAGATCCGTTGCTGAAAGTTTTAATTTTATTTATGCTCAAT…	TGACTGATTTGAGGTCTAAAGCTTAAATGCTATAAAAGCGAATTAGTAGCACCTCTTATATTTTAAGAAAACGTCCTTAGCGAAATAATTATTACGCCAAGTCAAACCGTTTATTTAAATAGGGTTGCTCGTGTATTTCAGTTGAGCCGGCAATTACGCCGACAGACAACCATAATCCAAGCCCACGCCCATTTCATTACAAAATAGGGGGGTTGAGAGTTTCATGACACTCAAACAGACATACTCTTCGGAATACCAAAGAGTGCAAGGTGCGTTCAAAGATTCGATGATTCACTGAATTCTGCAATTCACATTACTTATCGCAATTCGCTGCGTTCTTCATCGATGCGAGAGCCAAGAGATCCGTTGCTGAAAGTTTTAATTTTATTTATGCTCAAT…	Basidiomycota	Cystobasidiales	Cystobasidiaceae	Cystobasidium
114	G2_083_01	MT988262	NR_154834.1	GACTGATTCGAGGTCTAAATATAAATGCTATAAAAGCGCATTAGAAGCACCTCTTACTTTTGAAGAAAACGTCCTCAGCGAAATAATTATTACGCCGAGTCAAGCCGTTTATTTCAAATGGGTTGCTCGTGTATTTCAACTGAGCCGGCAATTACGCCGACAGCAGTCATAATCCAAGCCCACGCCCATCTCATTACAAAATAGGGGGGTTGAGAGTTTCATGACACTCAAACAGACATACTCTTCGGAATACCAAAGAGTGCAAGGTGCGTTCAAAGATTCGATGATTCACTGAATTCTGCAATTCACATTACTTATCGCAATTCGCTGCGTTCTTCATCGATGCGAGAGCCAAGAGATCCGTTGCTGAAAGTTTTATTTTTATTTATGCTCAATAAA…	Cystobasidium sp.		NR_154834.1 Cystobasidium pinicola CBS 9130 ITS region; from TYPE material >KY103147.1 Cystobasidium pinicola culture CBS:9130 small subunit ribosomal RNA gene, partial sequence; internal transcribed spacer 1, 5.8S ribosomal RNA gene, and internal transcribed spacer 2, complete sequence; and large subunit ribosomal RNA gene, partial sequence	99.63	541	0	539	1	1	1	GACTGATTCGAGGTCTAAA-TATAAATGCTATAAAAGCGCATTAGAAGCACCTCTTACTTTTGAAGAAAACGTCCTCAGCGAAATAATTATTACGCCGAGTCAAGCCGTTTATTTCAAATGGGTTGCTCGTGTATTTCAACTGAGCCGGCAATTACGCCGACAGCAGTCATAATCCAAGCCCACGCCCATCTCATTACAAAATAGGGGGGTTGAGAGTTTCATGACACTCAAACAGACATACTCTTCGGAATACCAAAGAGTGCAAGGTGCGTTCAAAGATTCGATGATTCACTGAATTCTGCAATTCACATTACTTATCGCAATTCGCTGCGTTCTTCATCGATGCGAGAGCCAAGAGATCCGTTGCTGAAAGTTTTATTTTTATTTATGCTCAATAA…	GACTGATTTGAGGTCTAAAATATAAATGCTATAAAAGCGCATTAGAAGCACCTCTTACTTTTGAAGAAAACGTCCTCAGCGAAATAATTATTACGCCGAGTCAAGCCGTTTATTTCAAATGGGTTGCTCGTGTATTTCAACTGAGCCGGCAATTACGCCGACAGCAGTCATAATCCAAGCCCACGCCCATCTCATTACAAAATAGGGGGGTTGAGAGTTTCATGACACTCAAACAGACATACTCTTCGGAATACCAAAGAGTGCAAGGTGCGTTCAAAGATTCGATGATTCACTGAATTCTGCAATTCACATTACTTATCGCAATTCGCTGCGTTCTTCATCGATGCGAGAGCCAAGAGATCCGTTGCTGAAAGTTTTATTTTTATTTATGCTCAATAA…	Basidiomycota	Cystobasidiales	Cystobasidiaceae	Cystobasidium
115	G2_088_02	MT988263	NR_154833.1	TCCTGACTGACTCGACGTCTAAAATTTAAAGTGCTGTAATAGCGCATTAGAAGCACCTCTAACTTTTGAAGAAAACGTCCTCAGCGAAATAATTATTACGCCGAGTCAAGCCGTTTATTTCAAATGGGTTGCTCGTGTATTTCAACTGAGCCGGCAATTACGCCGACAGCAGTCATAATCCAAGCCCACGCCCATCTCATTACAAAATAGGGGGGTTGAGAGTTTCATGACACTCAAACAGACATACTCTTCGGAATACCAAAGAGTGCAAGGTGCGTTCAAAGATTCGATGATTCACTGAATTCTGCAATTCACATTACTTATCGCAATTCGCTGCGTTCTTCATCGATGCGAGAGCCAAGAGATCCGTTGCTGAAAGTTTTATTTTTATTTATGCTC…	Cystobasidium sp.		NR_154833.1 Cystobasidium laryngis CBS 2221 ITS region; from TYPE material	99.434	530	0	527	3	0	0	TCCTGACTGACTCGACGTCTAAAATTTAAAGTGCTGTAATAGCGCATTAGAAGCACCTCTAACTTTTGAAGAAAACGTCCTCAGCGAAATAATTATTACGCCGAGTCAAGCCGTTTATTTCAAATGGGTTGCTCGTGTATTTCAACTGAGCCGGCAATTACGCCGACAGCAGTCATAATCCAAGCCCACGCCCATCTCATTACAAAATAGGGGGGTTGAGAGTTTCATGACACTCAAACAGACATACTCTTCGGAATACCAAAGAGTGCAAGGTGCGTTCAAAGATTCGATGATTCACTGAATTCTGCAATTCACATTACTTATCGCAATTCGCTGCGTTCTTCATCGATGCGAGAGCCAAGAGATCCGTTGCTGAAAGTTTTATTTTTATTTATGCTC…	TCCTGACTGATTTGAGGTCTAAAATTTAAAGTGCTGTAATAGCGCATTAGAAGCACCTCTAACTTTTGAAGAAAACGTCCTCAGCGAAATAATTATTACGCCGAGTCAAGCCGTTTATTTCAAATGGGTTGCTCGTGTATTTCAACTGAGCCGGCAATTACGCCGACAGCAGTCATAATCCAAGCCCACGCCCATCTCATTACAAAATAGGGGGGTTGAGAGTTTCATGACACTCAAACAGACATACTCTTCGGAATACCAAAGAGTGCAAGGTGCGTTCAAAGATTCGATGATTCACTGAATTCTGCAATTCACATTACTTATCGCAATTCGCTGCGTTCTTCATCGATGCGAGAGCCAAGAGATCCGTTGCTGAAAGTTTTATTTTTATTTATGCTC…	Basidiomycota	Cystobasidiales	Cystobasidiaceae	Cystobasidium
116	G2_088_05	MT988264	NR_154834.1	ATATACATCGCTATAAAAGCGCATTAGAAGCACCTCTTACTTTTGAAGAAAACGTCCTCAGCGAAATAATTATTACGCCGAGTCAAGCCGTTTATTTCAAATGGGTTGCTCGTGTATTTCAACTGAGCCGGCAATTACGCCGACAGCAGTCATAATCCAAGCCCACGCCCATCTCATTACAAAATAGGGGGGTTGAGAGTTTCATGACACTCAAACAGACATACTCTTCGGAATACCAAAGAGTGCAAGGTGCGTTCAAAGATTCGATGATTCACTGAATTCTGCAATTCACATTACTTATCGCAATTCGCTGCGTTCTTCATCGATGCGAGAGCCAAGAGATCCGTTGCTGAAAGTTTTATTTTTATTTATGCTCAATAAAGAGACTGTTACATTCTT…	Cystobasidium sp.		NR_154834.1 Cystobasidium pinicola CBS 9130 ITS region; from TYPE material >KY103147.1 Cystobasidium pinicola culture CBS:9130 small subunit ribosomal RNA gene, partial sequence; internal transcribed spacer 1, 5.8S ribosomal RNA gene, and internal transcribed spacer 2, complete sequence; and large subunit ribosomal RNA gene, partial sequence	99.612	516	0	514	1	1	1	ATATACATCGCTATAAAAGCGCATTAGAAGCACCTCTTACTTTTGAAGAAAACGTCCTCAGCGAAATAATTATTACGCCGAGTCAAGCCGTTTATTTCAAATGGGTTGCTCGTGTATTTCAACTGAGCCGGCAATTACGCCGACAGCAGTCATAATCCAAGCCCACGCCCATCTCATTACAAAATAGGGGGGTTGAGAGTTTCATGACACTCAAACAGACATACTCTTCGGAATACCAAAGAGTGCAAGGTGCGTTCAAAGATTCGATGATTCACTGAATTCTGCAATTCACATTACTTATCGCAATTCGCTGCGTTCTTCATCGATGCGAGAGCCAAGAGATCCGTTGCTGAAAGTTTTATTTTTATTTATGCTCAATAAAGAGACTGTTACATTCTT…	ATATAAAT-GCTATAAAAGCGCATTAGAAGCACCTCTTACTTTTGAAGAAAACGTCCTCAGCGAAATAATTATTACGCCGAGTCAAGCCGTTTATTTCAAATGGGTTGCTCGTGTATTTCAACTGAGCCGGCAATTACGCCGACAGCAGTCATAATCCAAGCCCACGCCCATCTCATTACAAAATAGGGGGGTTGAGAGTTTCATGACACTCAAACAGACATACTCTTCGGAATACCAAAGAGTGCAAGGTGCGTTCAAAGATTCGATGATTCACTGAATTCTGCAATTCACATTACTTATCGCAATTCGCTGCGTTCTTCATCGATGCGAGAGCCAAGAGATCCGTTGCTGAAAGTTTTATTTTTATTTATGCTCAATAAAGAGACTGTTACATTCTT…	Basidiomycota	Cystobasidiales	Cystobasidiaceae	Cystobasidium
117	G2_147_02	MT988265	KX067831.1	GTTCCTTTTTAGAAGTCCGACCCTTTCATTTTCTTACACTGTGCACACACTTCTTTTTTACACACACTTTTAACACCTTAGTATAAGAATGTAATAGTCTCTTTATTGAGCATAAATAAAATTAAAACTTTCAGCAACGGATCTCTTGGCTCTCGCATCGATGAAGAACGCAGCGAATTGCGATAAGTAATGTGAATTGCAGAATTCAGTGAATCATCGAATCTTTGAACGCACCTTGCACTCTTTGGTATTCCGAAGAGTATGTCTGTTTGAGTGTCATGAAACTCTCAACCCCCCTATTTTGTAATGAAATGGGCGTGGGCTTGGATTATGGTTGTCTGTCGGCGTAATTGCCGGCTCAACTGAAATACACGAGCAACCCTATTTAAATAAACGGTT…	Cystobasidium sp.		KX067831.1 Cystobasidium slooffiae isolate RP314_6 internal transcribed spacer 1, partial sequence; 5.8S ribosomal RNA gene and internal transcribed spacer 2, complete sequence; and 28S ribosomal RNA gene, partial sequence	99.632	544	0	542	1	1	1	GTTCCTTTTTAGAAGTCCGACCCTTTCATTTTCTTACACTGTGCACACACTTCTTTTTTACACACACTTTTAACACCTTAGTATAAGAATGTAATAGTCTCTTTATTGAGCATAAATAAAATTAAAACTTTCAGCAACGGATCTCTTGGCTCTCGCATCGATGAAGAACGCAGCGAATTGCGATAAGTAATGTGAATTGCAGAATTCAGTGAATCATCGAATCTTTGAACGCACCTTGCACTCTTTGGTATTCCGAAGAGTATGTCTGTTTGAGTGTCATGAAACTCTCAACCCCCCTATTTTGTAATGAAATGGGCGTGGGCTTGGATTATGGTTGTCTGTCGGCGTAATTGCCGGCTCAACTGAAATACACGAGCAACCCTATTTAAATAAACGGTT…	GTT-CTTTTTAGAAGTCCGACCCTTTCATTTTCTTACACTGTGCACACACTTCTTTTTTACACACACTTTTAACACCTTAGTATAAGAATGTAATAGTCTCTTTATTGAGCATAAATAAAATTAAAACTTTCAGCAACGGATCTCTTGGCTCTCGCATCGATGAAGAACGCAGCGAATTGCGATAAGTAATGTGAATTGCAGAATTCAGTGAATCATCGAATCTTTGAACGCACCTTGCACTCTTTGGTATTCCGAAGAGTATGTCTGTTTGAGTGTCATGAAACTCTCAACCCCCCTATTTTGTAATGAAATGGGCGTGGGCTTGGATTATGGTTGTCTGTCGGCGTAATTGCCGGCTCAACTGAAATACACGAGCAACCCTATTTAAATAAACGGTT…	Basidiomycota	Cystobasidiales	Cystobasidiaceae	Cystobasidium
118	G2_163_02-1	MT988266	KT876712.1	CGTTCTTTTTAGAGTCCGACCCTTTCATTTTCTTACACTGTGCACACACTTCTTTTTTACACACACTTTTAACACCTTAGTATAAGAATGTAATACTCTCTTAATTGAGCATAAATAAAAACAAAACTTTCAGCAACGGATCTCTTGGCTCTCGCATCGATGAAGAACGCAGCGAATTGCGATAAGTAATGTGAATTGCAGAATTCAGTGAATCATCTAATCTTTGAACGCACCTTGCACTCTTTGGTATTCCGAAAAGTATGTCTGTTTGAGTGTCATGAAACTCACAACCCCCCTATTTTGTAATGAGATGGGTGTGGGCTTGGATTATGGTTGTCTGTCGGCGTAATTGCCGGCTCAACTGAAATACACGAGCAACCCTATTGAAATAAACGGTTT…	Cystobasidium sp.		KT876712.1 Cystobasidium slooffiae isolate B10-9 internal transcribed spacer 1, partial sequence; 5.8S ribosomal RNA gene, complete sequence; and internal transcribed spacer 2, partial sequence	97.794	544	0	532	12	0	0	CGTTCTTTTTAGAGTCCGACCCTTTCATTTTCTTACACTGTGCACACACTTCTTTTTTACACACACTTTTAACACCTTAGTATAAGAATGTAATACTCTCTTAATTGAGCATAAATAAAAACAAAACTTTCAGCAACGGATCTCTTGGCTCTCGCATCGATGAAGAACGCAGCGAATTGCGATAAGTAATGTGAATTGCAGAATTCAGTGAATCATCTAATCTTTGAACGCACCTTGCACTCTTTGGTATTCCGAAAAGTATGTCTGTTTGAGTGTCATGAAACTCACAACCCCCCTATTTTGTAATGAGATGGGTGTGGGCTTGGATTATGGTTGTCTGTCGGCGTAATTGCCGGCTCAACTGAAATACACGAGCAACCCTATTGAAATAAACGGTTT…	CGTTCTTTTTAGAGTCCGACCCTTTCATTTTCTTACACTGTGCACACACTTCTTTTTTACACACACTTTTAACACCTTAGTATAAGAATGTAATAGTCTCTTAATTGAGCATAAATAAAAACAAAACTTTCAGCAACGGATCTCTTGGCTCTCGCATCGATGAAGAACGCAGCGAATTGCGATAAGTAATGTGAATTGCAGAATTCAGTGAATCATCGAATCTTTGAACGCACCTTGCACTCTTTGGTATTCCGAAGAGTATGTCTGTTTGAGTGTCATGAAACTCTCAACCCCCCTATTTTGTAATGAGATGGGTGTGGGCTTGGATTATGGTTGTCTGTCGGCGTAATTGCCGGCTCAACTGAAATACACGAGCAACCCTATTGAAATAAACGGTTT…	Basidiomycota	Cystobasidiales	Cystobasidiaceae	Cystobasidium
119	G2_296_01-1	MT988267	NR_154834.1	GACTCTCTTTTTAGAGGTCCGACCCTTTCATTTCCTTACACTGTGCACACACTTCTTTTCACACATTTTAACACTATAGTATAAGAATGTAACAGTCTCTTTATTGAGCATAAATAAAAATAAAACTTTCAGCAACGGATCTCTTGGCTCTCGCATCGATGAAGAACGCAGCGAATTGCGATAAGTAATGTGAATTGCAGAATTCAGTGAATCATCGAATCTTTGAACGCACCTTGCACTCTTTGGTATTCCGAAGAGTATGTCTGTTTGAGTGTCATGAAACTCTCAACCCCCCTATTTTGTAATGAGATGGGCGTGGGCTTGGATTATGACTGCTGTCGGCGTAATTGCCGGCTCAGTTGAAATACACGAGCAACCCATTTGAAATAAACGGCTTGA…	Cystobasidium sp.		NR_154834.1 Cystobasidium pinicola CBS 9130 ITS region; from TYPE material >KY103147.1 Cystobasidium pinicola culture CBS:9130 small subunit ribosomal RNA gene, partial sequence; internal transcribed spacer 1, 5.8S ribosomal RNA gene, and internal transcribed spacer 2, complete sequence; and large subunit ribosomal RNA gene, partial sequence	100	528	0	528	0	0	0	GACTCTCTTTTTAGAGGTCCGACCCTTTCATTTCCTTACACTGTGCACACACTTCTTTTCACACATTTTAACACTATAGTATAAGAATGTAACAGTCTCTTTATTGAGCATAAATAAAAATAAAACTTTCAGCAACGGATCTCTTGGCTCTCGCATCGATGAAGAACGCAGCGAATTGCGATAAGTAATGTGAATTGCAGAATTCAGTGAATCATCGAATCTTTGAACGCACCTTGCACTCTTTGGTATTCCGAAGAGTATGTCTGTTTGAGTGTCATGAAACTCTCAACCCCCCTATTTTGTAATGAGATGGGCGTGGGCTTGGATTATGACTGCTGTCGGCGTAATTGCCGGCTCAGTTGAAATACACGAGCAACCCATTTGAAATAAACGGCTTGA…	GACTCTCTTTTTAGAGGTCCGACCCTTTCATTTCCTTACACTGTGCACACACTTCTTTTCACACATTTTAACACTATAGTATAAGAATGTAACAGTCTCTTTATTGAGCATAAATAAAAATAAAACTTTCAGCAACGGATCTCTTGGCTCTCGCATCGATGAAGAACGCAGCGAATTGCGATAAGTAATGTGAATTGCAGAATTCAGTGAATCATCGAATCTTTGAACGCACCTTGCACTCTTTGGTATTCCGAAGAGTATGTCTGTTTGAGTGTCATGAAACTCTCAACCCCCCTATTTTGTAATGAGATGGGCGTGGGCTTGGATTATGACTGCTGTCGGCGTAATTGCCGGCTCAGTTGAAATACACGAGCAACCCATTTGAAATAAACGGCTTGA…	Basidiomycota	Cystobasidiales	Cystobasidiaceae	Cystobasidium
120	G2_302_02	MT988268	NR_154833.1	TCTTTTTAGAGGTCCGACCCTTTCATTTCCATACACTGTGCACACACTTCTTTTCACACATTTTAACACTATAGTATAAGAATGTAACAGTCTCTTTATTGAGCATAAATAAAAATAAAACTTTCAGCAACGGATCTCTTGGCTCTCGCATCGATGAAGAACGCAGCGAATTGCGATAAGTAATGTGAATTGCAGAATTCAGTGAATCATCGAATCTTTGAACGCACCTTGCACTCTTTGGTATTCCGAAGAGTATGTCTGTTTGAGTGTCATGAAACTCTCAACCCCCCTATTTTGTAATGAGATGGGCGTGGGCTTGGATTATGACTGCTGTCGGCGTAATTGCCGGCTCAGTTGAAATACACGAGCAACCCATTTGAAATAAACGGCTTGACTCGG…	Cystobasidium sp.		NR_154833.1 Cystobasidium laryngis CBS 2221 ITS region; from TYPE material	99.812	533	0	532	1	0	0	TCTTTTTAGAGGTCCGACCCTTTCATTTCCATACACTGTGCACACACTTCTTTTCACACATTTTAACACTATAGTATAAGAATGTAACAGTCTCTTTATTGAGCATAAATAAAAATAAAACTTTCAGCAACGGATCTCTTGGCTCTCGCATCGATGAAGAACGCAGCGAATTGCGATAAGTAATGTGAATTGCAGAATTCAGTGAATCATCGAATCTTTGAACGCACCTTGCACTCTTTGGTATTCCGAAGAGTATGTCTGTTTGAGTGTCATGAAACTCTCAACCCCCCTATTTTGTAATGAGATGGGCGTGGGCTTGGATTATGACTGCTGTCGGCGTAATTGCCGGCTCAGTTGAAATACACGAGCAACCCATTTGAAATAAACGGCTTGACTCGG…	TCTTTTTAGAGGTCCGACCCTTTCATTTCCATACACTGTGCACACACTTCTTTTCACACATTTTAACACTATAGTATAAGAATGTAACAGTCTCTTTATTGAGCATAAATAAAAATAAAACTTTCAGCAACGGATCTCTTGGCTCTCGCATCGATGAAGAACGCAGCGAATTGCGATAAGTAATGTGAATTGCAGAATTCAGTGAATCATCGAATCTTTGAACGCACCTTGCACTCTTTGGTATTCCGAAGAGTATGTCTGTTTGAGTGTCATGAAACTCTCAACCCCCCTATTTTGTAATGAGATGGGCGTGGGCTTGGATTATGACTGCTGTCGGCGTAATTGCCGGCTCAGTTGAAATACACGAGCAACCCATTTGAAATAAACGGCTTGACTCGG…	Basidiomycota	Cystobasidiales	Cystobasidiaceae	Cystobasidium
121	G2_310_02	MT988269	KX067831.1	TAGGACGTTCTTTTTAGAAGTCCGACCCTTTCATTTTCTTACACTGTGCACACACTTCTTTTTTACACACACTTTTAACACCTTAGTATAAGAATGTAATAGTCTCTTTATTGAGCATAAATAAAATTAAAACTTTCAGCAACGGATCTCTTGGCTCTCGCATCGATGAAGAACGCAGCGAATTGCGATAAGTAATGTGAATTGCAGAATTCAGTGAATCATCGAATCTTTGAACGCACCTTGCACTCTTTGGTATTCCGAAGAGTATGTCTGTTTGAGTGTCATGAAACTCTCAACCCCCCTATTTTGTAATGAAATGGGCGTGGGCTTGGATTATGGTTGTCTGTCGGCGTAATTGCCGGCTCAACTGAAATACACGAGCAACCCTATTTAAATAAA…	Cystobasidium sp.		KX067831.1 Cystobasidium slooffiae isolate RP314_6 internal transcribed spacer 1, partial sequence; 5.8S ribosomal RNA gene and internal transcribed spacer 2, complete sequence; and 28S ribosomal RNA gene, partial sequence	99.089	549	0	544	5	0	0	TAGGACGTTCTTTTTAGAAGTCCGACCCTTTCATTTTCTTACACTGTGCACACACTTCTTTTTTACACACACTTTTAACACCTTAGTATAAGAATGTAATAGTCTCTTTATTGAGCATAAATAAAATTAAAACTTTCAGCAACGGATCTCTTGGCTCTCGCATCGATGAAGAACGCAGCGAATTGCGATAAGTAATGTGAATTGCAGAATTCAGTGAATCATCGAATCTTTGAACGCACCTTGCACTCTTTGGTATTCCGAAGAGTATGTCTGTTTGAGTGTCATGAAACTCTCAACCCCCCTATTTTGTAATGAAATGGGCGTGGGCTTGGATTATGGTTGTCTGTCGGCGTAATTGCCGGCTCAACTGAAATACACGAGCAACCCTATTTAAATAAA…	TAGGACGTTCTTTTTAGAAGTCCGACCCTTTCATTTTCTTACACTGTGCACACACTTCTTTTTTACACACACTTTTAACACCTTAGTATAAGAATGTAATAGTCTCTTTATTGAGCATAAATAAAATTAAAACTTTCAGCAACGGATCTCTTGGCTCTCGCATCGATGAAGAACGCAGCGAATTGCGATAAGTAATGTGAATTGCAGAATTCAGTGAATCATCGAATCTTTGAACGCACCTTGCACTCTTTGGTATTCCGAAGAGTATGTCTGTTTGAGTGTCATGAAACTCTCAACCCCCCTATTTTGTAATGAAATGGGCGTGGGCTTGGATTATGGTTGTCTGTCGGCGTAATTGCCGGCTCAACTGAAATACACGAGCAACCCTATTTAAATAAA…	Basidiomycota	Cystobasidiales	Cystobasidiaceae	Cystobasidium
122	B194	MT988270	NR_073232.1	AACAGCTAGCGGTGGCCAACGCCCACAAGGAGCACTGTCCTCGACGGAGATCTTATCACGTCGAGTAGAACCAACACTAGAGGATTCAGCTAATAAATTTCAAGTGAGCCGATGCAGCGAGGGCACCAGCAGCACTCACGTCCACGCTCCAGCCCTCTAATAAAAGAGTGCTGCAGGTGAGAGTTTCATGACACTCAAACAGGCATGCTCTTCGGAATACCAAAGAGCGCAAGATGCGTTCAAAGATTCGATGATTCACTGAATTCTGCAATTCACATTACTTATCGCAATTCGCTGCGTTCTTCATCGATGCGAGAACCAAGAGATCCGTTGTTGAAAGTTATATTAGTTTATAACGATTTTACATTCAATGACTTGTGTATATGGGTATGGTAATTA…	Cystofilobasidium aff. infirmominiatum		NR_073232.1 Cystofilobasidium infirmominiatum CBS 323 ITS region; from TYPE material >AF444400.1 Cystofilobasidium infirmominiatum strain CBS 323 18S ribosomal RNA gene, partial sequence; internal transcribed spacer 1, 5.8S ribosomal RNA gene, and internal transcribed spacer 2, complete sequence; and 28S ribosomal RNA gene, partial sequence >KJ081133.1 Uncultured Cystofilobasidium clone XN-6 18S …	100	510	0	510	0	0	0	AACAGCTAGCGGTGGCCAACGCCCACAAGGAGCACTGTCCTCGACGGAGATCTTATCACGTCGAGTAGAACCAACACTAGAGGATTCAGCTAATAAATTTCAAGTGAGCCGATGCAGCGAGGGCACCAGCAGCACTCACGTCCACGCTCCAGCCCTCTAATAAAAGAGTGCTGCAGGTGAGAGTTTCATGACACTCAAACAGGCATGCTCTTCGGAATACCAAAGAGCGCAAGATGCGTTCAAAGATTCGATGATTCACTGAATTCTGCAATTCACATTACTTATCGCAATTCGCTGCGTTCTTCATCGATGCGAGAACCAAGAGATCCGTTGTTGAAAGTTATATTAGTTTATAACGATTTTACATTCAATGACTTGTGTATATGGGTATGGTAATTA…	AACAGCTAGCGGTGGCCAACGCCCACAAGGAGCACTGTCCTCGACGGAGATCTTATCACGTCGAGTAGAACCAACACTAGAGGATTCAGCTAATAAATTTCAAGTGAGCCGATGCAGCGAGGGCACCAGCAGCACTCACGTCCACGCTCCAGCCCTCTAATAAAAGAGTGCTGCAGGTGAGAGTTTCATGACACTCAAACAGGCATGCTCTTCGGAATACCAAAGAGCGCAAGATGCGTTCAAAGATTCGATGATTCACTGAATTCTGCAATTCACATTACTTATCGCAATTCGCTGCGTTCTTCATCGATGCGAGAACCAAGAGATCCGTTGTTGAAAGTTATATTAGTTTATAACGATTTTACATTCAATGACTTGTGTATATGGGTATGGTAATTA…	Basidiomycota	Cystofilobasidiales	Cystofilobasidiaceae	Cystofilobasidium
123	B161	MT988271	MG938354.1	GCCAGTTGTCAAAAGTTGCCAGCACTCGAAGTCTGCGCTAATTAGAAGCGACGTCAACTGCTAGGAGCGGCCAGCACAACAAGTTGCACTGTCCTCGACGGAGATCTTATCACGTCGAGTAGAACCACCTCTAGAGGAGTCAGCTAACATATTTCAAGTGAGCCGATGCAACCAGGGCACCAGCAGCACTCACGTCCACGCCCCAACACCTCTAATTAAAGAAGGCTGGAGGTGAGAGTTTCATGACACTCAAACAGGCATGCTCTTCGGAATACCAAAGAGCGCAAGATGCGTTCAAAGATTCGATGATTCACTGAATTCTGCAATTCACATTACTTATCGCAATTCGCTGCGTTCTTCATCGATGCGAGAACCAAGAGATCCGTTGTTGAAAGTTAT…	Cystofilobasidium aff. macerans		MG938354.1 Cystofilobasidium macerans strain KJM11 small subunit ribosomal RNA gene, partial sequence; internal transcribed spacer 1, 5.8S ribosomal RNA gene, and internal transcribed spacer 2, complete sequence; and large subunit ribosomal RNA gene, partial sequence	99.834	603	0	602	0	1	1	GCC-AGTTGTCAAAAGTTGCCAGCACTCGAAGTCTGCGCTAATTAGAAGCGACGTCAACTGCTAGGAGCGGCCAGCACAACAAGTTGCACTGTCCTCGACGGAGATCTTATCACGTCGAGTAGAACCACCTCTAGAGGAGTCAGCTAACATATTTCAAGTGAGCCGATGCAACCAGGGCACCAGCAGCACTCACGTCCACGCCCCAACACCTCTAATTAAAGAAGGCTGGAGGTGAGAGTTTCATGACACTCAAACAGGCATGCTCTTCGGAATACCAAAGAGCGCAAGATGCGTTCAAAGATTCGATGATTCACTGAATTCTGCAATTCACATTACTTATCGCAATTCGCTGCGTTCTTCATCGATGCGAGAACCAAGAGATCCGTTGTTGAAAGTTA…	GCCAAGTTGTCAAAAGTTGCCAGCACTCGAAGTCTGCGCTAATTAGAAGCGACGTCAACTGCTAGGAGCGGCCAGCACAACAAGTTGCACTGTCCTCGACGGAGATCTTATCACGTCGAGTAGAACCACCTCTAGAGGAGTCAGCTAACATATTTCAAGTGAGCCGATGCAACCAGGGCACCAGCAGCACTCACGTCCACGCCCCAACACCTCTAATTAAAGAAGGCTGGAGGTGAGAGTTTCATGACACTCAAACAGGCATGCTCTTCGGAATACCAAAGAGCGCAAGATGCGTTCAAAGATTCGATGATTCACTGAATTCTGCAATTCACATTACTTATCGCAATTCGCTGCGTTCTTCATCGATGCGAGAACCAAGAGATCCGTTGTTGAAAGTTA…	Basidiomycota	Cystofilobasidiales	Cystofilobasidiaceae	Cystofilobasidium
124	B189	MT988272	MG938354.1	GCTAGGAGCGGCCAGCACAACAAGTTGCACTGTCCTCGACGGAGATCTTATCACGTCGAGTAGAACCACCTCTAGAGGAGTCAGCTAACATATTTCAAGTGAGCCGATGCAACCAGGGCACCAGCAGCACTCACGTCCACGCCCCAACACCTCTAATTAAAGAAGGCTGGAGGTGAGAGTTTCATGACACTCAAACAGGCATGCTCTTCGGAATACCAAAGAGCGCAAGATGCGTTCAAAGATTCGATGATTCACTGAATTCTGCAATTCACATTACTTATCGCAATTCGCTGCGTTCTTCATCGATGCGAGAACCAAGAGATCCGTTGTTGAAAGTTATATTAGTTTATAACGATTTTACATTCAATGACTTGTGTATATGGGTATAATTATAAAGAC…	Cystofilobasidium aff. macerans		MG938354.1 Cystofilobasidium macerans strain KJM11 small subunit ribosomal RNA gene, partial sequence; internal transcribed spacer 1, 5.8S ribosomal RNA gene, and internal transcribed spacer 2, complete sequence; and large subunit ribosomal RNA gene, partial sequence	100	543	0	543	0	0	0	GCTAGGAGCGGCCAGCACAACAAGTTGCACTGTCCTCGACGGAGATCTTATCACGTCGAGTAGAACCACCTCTAGAGGAGTCAGCTAACATATTTCAAGTGAGCCGATGCAACCAGGGCACCAGCAGCACTCACGTCCACGCCCCAACACCTCTAATTAAAGAAGGCTGGAGGTGAGAGTTTCATGACACTCAAACAGGCATGCTCTTCGGAATACCAAAGAGCGCAAGATGCGTTCAAAGATTCGATGATTCACTGAATTCTGCAATTCACATTACTTATCGCAATTCGCTGCGTTCTTCATCGATGCGAGAACCAAGAGATCCGTTGTTGAAAGTTATATTAGTTTATAACGATTTTACATTCAATGACTTGTGTATATGGGTATAATTATAAAGAC…	GCTAGGAGCGGCCAGCACAACAAGTTGCACTGTCCTCGACGGAGATCTTATCACGTCGAGTAGAACCACCTCTAGAGGAGTCAGCTAACATATTTCAAGTGAGCCGATGCAACCAGGGCACCAGCAGCACTCACGTCCACGCCCCAACACCTCTAATTAAAGAAGGCTGGAGGTGAGAGTTTCATGACACTCAAACAGGCATGCTCTTCGGAATACCAAAGAGCGCAAGATGCGTTCAAAGATTCGATGATTCACTGAATTCTGCAATTCACATTACTTATCGCAATTCGCTGCGTTCTTCATCGATGCGAGAACCAAGAGATCCGTTGTTGAAAGTTATATTAGTTTATAACGATTTTACATTCAATGACTTGTGTATATGGGTATAATTATAAAGAC…	Basidiomycota	Cystofilobasidiales	Cystofilobasidiaceae	Cystofilobasidium
125	G2_037_05	MT988273	MG020689.1	TTGAGGCCAGATGTCAAGAATATTAATCGTAAGATCAATGGATTAGAAAGCGGTCTTTAGTCCTGCAACGCGGCCATCCGAAGATGTCCTTAGCGAAATACTTATTACGCCAAGTCAAACCATGTCGCGAGACAGATCCAGCTATTACTTTTAAGACGAGCCGACTTATCATCGGCAAACGTCCAAATCCAAACCAAAGAAAGGTTTTAACCAATCTAGGGTTGAGGGTTTTCATGACACTCAAACAGGCATGCTCCTCGGAATACCAAGGAGCGCAAGGTGCGTTCAAAGATTCGATGATTCACTGAATTCTGCAATTCACATTACTTATCGCATTTCGCTGCGTTCTTCATCGATGCGAGAGCCAAGAGATCCGTTGTTGAAAGTTTTATTATGTTA…	Naganishia aff. adeliensis		MG020689.1 Naganishia adeliensis isolate 4-ITS1 internal transcribed spacer 1, partial sequence; 5.8S ribosomal RNA gene and internal transcribed spacer 2, complete sequence; and large subunit ribosomal RNA gene, partial sequence	99.625	534	0	532	2	0	0	TTGAGGCCAGATGTCAAGAATATTAATCGTAAGATCAATGGATTAGAAAGCGGTCTTTAGTCCTGCAACGCGGCCATCCGAAGATGTCCTTAGCGAAATACTTATTACGCCAAGTCAAACCATGTCGCGAGACAGATCCAGCTATTACTTTTAAGACGAGCCGACTTATCATCGGCAAACGTCCAAATCCAAACCAAAGAAAGGTTTTAACCAATCTAGGGTTGAGGGTTTTCATGACACTCAAACAGGCATGCTCCTCGGAATACCAAGGAGCGCAAGGTGCGTTCAAAGATTCGATGATTCACTGAATTCTGCAATTCACATTACTTATCGCATTTCGCTGCGTTCTTCATCGATGCGAGAGCCAAGAGATCCGTTGTTGAAAGTTTTATTATGTTA…	TTGAGGCCAGATGTCAAGAATATTAATCGTAAGATCAATGGATTAGAAAGCGGTCTTTAGTCCTGCAACGCGGCCATCCGAAGATGTCCTTAGCGAAATACTTATTACGCCAAGTCAAACCATGTCGCGAGACAGATCCAGCTATTACTTTTAAGACGAGCCGACTTATCATCGGCAAACGTCCAAATCCAAACCAAAGAAAGGTTTTAACCAATCTAGGGTTGAGGGTTTTCATGACACTCAAACAGGCATGCTCCTCGGAATACCAAGGAGCGCAAGGTGCGTTCAAAGATTCGATGATTCACTGAATTCTGCAATTCACATTACTTATCGCATTTCGCTGCGTTCTTCATCGATGCGAGAGCCAAGAGATCCGTTGTTGAAAGTTTTATTATGTTA…	Basidiomycota	Filobasidiales	Filobasidiaceae	Naganishia
126	B067	MT988274	MK782339.1	CAGTAAAGTAGCGTCTCATAGTGAGAACATGATTAGAAGCAGACGGCATCAAGCCTTGGCCAGGTGTTACCTTGTCCCCGATGAATACTTATTACATCGAGTCGAACCAAGTCATAGACAAGTCCAGCTAATAGTTTTAAGGCGAGCCACTTTGCAGCAGCAACACCCAAGTCCAAACCTTGATGGTAAAACCAATCAAGGTTGAGGTTGTTCACGACACTCAAACAGGCATGCCCGTCGGAATACCAACGGGCGCAAGGTGCGTTCAAAGATTCGATGATTCACTGAATTCTGCAATTCACATTACTTATCGCATTTCGCTGCGTTCTTCATCGATGCGAGAGCCAAGAGATCCGTTGTTAAAAGTTTTATTTGTTATAATAATTTACGTTCGTCACA…	Holtermanniella sp.		MK782339.1 Holtermanniella takashimae isolate NWHC 46388-1836_3SD small subunit ribosomal RNA gene, partial sequence; internal transcribed spacer 1 and 5.8S ribosomal RNA gene, complete sequence; and internal transcribed spacer 2, partial sequence	99.407	506	0	503	2	1	1	CAGTAAAGTAGCGTCTCATAGTGAGAACATGATTAGAAGCAGACGGCATCAAGCCTTGGCCAGGTGTTACCTTGTCCCCGATGAATACTTATTACATCGAGTCGAACCAAGTCATAGACAAGTCCAGCTAATAGTTTTAAGGCGAGCCACTTTGCAGCAGCAACACCCAAGTCCAAACCTTGATGGTAAAACCAATCAAGGTTGAGGTTGTTCACGACACTCAAACAGGCATGCCCGTCGGAATACCAACGGGCGCAAGGTGCGTTCAAAGATTCGATGATTCACTGAATTCTGCAATTCACATTACTTATCGCATTTCGCTGCGTTCTTCATCGATGCGAGAGCCAAGAGATCCGTTGTTAAAAGTTTTATTTGTTATAATAATTTACGTTCGTCACA…	CAGT-AAGTAGCGTCTCATAGTGAGAACATGATTAGAAGCAGACGGCATCAAGCCTTGGCCAGGTGTTACCCTGTCCCCGATGAATACTTATTACATCGAGTCGAACCAAGTCATAGACAAGTCCAGCTAATAGTTTTAAGGCGAGCCACTTTGCAGCAGCAACACCCAAGTCCAAGCCTTGATGGTAAAACCAATCAAGGTTGAGGTTGTTCACGACACTCAAACAGGCATGCCCGTCGGAATACCAACGGGCGCAAGGTGCGTTCAAAGATTCGATGATTCACTGAATTCTGCAATTCACATTACTTATCGCATTTCGCTGCGTTCTTCATCGATGCGAGAGCCAAGAGATCCGTTGTTAAAAGTTTTATTTGTTATAATAATTTACGTTCGTCACA…	Basidiomycota	Holtermanniales	Holtermanniella	Holtermanniella
127	B089	MT988275		GCCACACAGTAAAGTAGCGTCTCATAGTGAGAACATGATTAGAAGCMGACGGCATCAAGCCTTGGCCAGGTGTTACCCTGTCCCCGATGAATACTTATTACATCGAGTCGAACCAAGTCATAGACAAGTCCAGCTAATAGTTTTAAGGCGAGCCACTTTGCAGCAGCAACACCCAAATCCAAGCCTTGATTAGTAAAACCAATCAAGGTTGAGGTTGTTCACGACACTCAAACAGGCATGCCCGTCGGAATACCAACGGGCGCAAGGTGCGTTCAAAGATTCGATGATTCACTGAATTCTGCAATTCACATTACTTATCGCATTTCGCTGCGTTCTTCATCGATGCGAGAGCCAAGAGATCCGTTGTTAAAAGTTTTATTTGTTATAATAATTTACGTT…	Holtermanniella sp.				523	0	521	2	0	0	GCCACACAGTAAAGTAGCGTCTCATAGTGAGAACATGATTAGAAGCMGACGGCATCAAGCCTTGGCCAGGTGTTACCCTGTCCCCGATGAATACTTATTACATCGAGTCGAACCAAGTCATAGACAAGTCCAGCTAATAGTTTTAAGGCGAGCCACTTTGCAGCAGCAACACCCAAATCCAAGCCTTGATTAGTAAAACCAATCAAGGTTGAGGTTGTTCACGACACTCAAACAGGCATGCCCGTCGGAATACCAACGGGCGCAAGGTGCGTTCAAAGATTCGATGATTCACTGAATTCTGCAATTCACATTACTTATCGCATTTCGCTGCGTTCTTCATCGATGCGAGAGCCAAGAGATCCGTTGTTAAAAGTTTTATTTGTTATAATAATTTACGTT…	GCCACACAGTAAAGTAGCGTCTCATAGTGAGAACATGATTAGAAGCAGACGGCATCAAGCCTTGGCCAGGTGTTACCCTGTCCCCGATGAATACTTATTACATCGAGTCGAACCAAGTCATAGACAAGTCCAGCTAATAGTTTTAAGGCGAGCCACTTTGCAGCAGCAACACCCAAGTCCAAGCCTTGATTAGTAAAACCAATCAAGGTTGAGGTTGTTCACGACACTCAAACAGGCATGCCCGTCGGAATACCAACGGGCGCAAGGTGCGTTCAAAGATTCGATGATTCACTGAATTCTGCAATTCACATTACTTATCGCATTTCGCTGCGTTCTTCATCGATGCGAGAGCCAAGAGATCCGTTGTTAAAAGTTTTATTTGTTATAATAATTTACGTT…	Basidiomycota	Holtermanniales	Holtermanniella	Holtermanniella
128	B098	MT988276	MK782397.1	ATCAAGCCTTGGCCAGGTGTTACCCTGTCCCCGATGAATACTTATTACATCGAGTCGAACCAAGTCATAGACAAGTCCAGCTAATAGTTTTAAGGCGAGCCACTTTGCAGCAGCAACACCCAAATCCAAGCCTTGATTAGTAAAAACCAATCAAGGTTGAGGTTGTTCACGACACTCAAACAGGCATGCCCGTCGGAATACCAACGGGCGCAAGGTGCGTTCAAAGATTCGATGATTCACTGAATTCTGCAATTCACATTACTTATCGCATTTCGCTGCGTTCTTCATCGATGCGAGAGCCAAGAGATCCGTTGTTAAAAGTTTTATTTGTTATAATAATTTACGTTCGTCACAGTTGTAATTAAAGACCCGAAGGCCAACAGTTCACAGGTGTGTATA…	Holtermanniella sp.		MK782397.1 Holtermanniella takashimae isolate NWHC 46749_2_1SD small subunit ribosomal RNA gene, partial sequence; internal transcribed spacer 1 and 5.8S ribosomal RNA gene, complete sequence; and internal transcribed spacer 2, partial sequence	99.575	471	0	469	1	1	1	ATCAAGCCTTGGCCAGGTGTTACCCTGTCCCCGATGAATACTTATTACATCGAGTCGAACCAAGTCATAGACAAGTCCAGCTAATAGTTTTAAGGCGAGCCACTTTGCAGCAGCAACACCCAAATCCAAGCCTTGATTAGTAAAAACCAATCAAGGTTGAGGTTGTTCACGACACTCAAACAGGCATGCCCGTCGGAATACCAACGGGCGCAAGGTGCGTTCAAAGATTCGATGATTCACTGAATTCTGCAATTCACATTACTTATCGCATTTCGCTGCGTTCTTCATCGATGCGAGAGCCAAGAGATCCGTTGTTAAAAGTTTTATTTGTTATAATAATTTACGTTCGTCACAGTTGTAATTAAAGACCCGAAGGCCAACAGTTCACAGGTGTGTATA…	ATCAAGCCTTGGCCAGGTGTTACCCTGTCCCCGATGAATACTTATTACATCGAGTCGAACCAAGTCATAGACAAGTCCAGCTAATAGTTTTAAGGCGAGCCACTTTGCAGCAGCAACACCCAAGTCCAAGCCTTGATTAGTAAAA-CCAATCAAGGTTGAGGTTGTTCACGACACTCAAACAGGCATGCCCGTCGGAATACCAACGGGCGCAAGGTGCGTTCAAAGATTCGATGATTCACTGAATTCTGCAATTCACATTACTTATCGCATTTCGCTGCGTTCTTCATCGATGCGAGAGCCAAGAGATCCGTTGTTAAAAGTTTTATTTGTTATAATAATTTACGTTCGTCACAGTTGTAATTAAAGACCCGAAGGCCAACAGTTCACAGGTGTGTATA…	Basidiomycota	Holtermanniales	Holtermanniella	Holtermanniella
129	B099	MT988277	JX188168.1	TGATTTGAGGCCACACAGTAAAGTAGCGTCTCATAGTGAGAACATGATTAGAAGCAGACGGCATCAAGCCTTGGCCAGGTGTTACCCTGTCCCCGATGAATACTTATTACATCGAGTCGAACCAAGTCATAGACAAGTCCAGCTAATAGTTTTAAGGCGAGCCACTTTGCAGCAGCAACACCCAAATCCAAGCCTTGATTAGTAAAAACCAATCAAGGTTGAGGTTGTTCACGACACTCAAACAGGCATGCCCGTCGGAATACCAACGGGCGCAAGGTGCGTTCAAAGATTCGATGATTCACTGAATTCTGCAATTCACATTACTTATCGCATTTCGCTGCGTTCTTCATCGATGCGAGAGCCAAGAGATCCGTTGTTAAAAGTTTTATTTGTTATAAT…	Holtermanniella sp.		JX188168.1 Holtermanniella takashimae strain P34B009 internal transcribed spacer 1, partial sequence; 5.8S ribosomal RNA gene and internal transcribed spacer 2, complete sequence; and large subunit ribosomal RNA gene, partial sequence	99.795	487	0	486	0	1	1	TGATTTGAGGCCACACAGTAAAGTAGCGTCTCATAGTGAGAACATGATTAGAAGCAGACGGCATCAAGCCTTGGCCAGGTGTTACCCTGTCCCCGATGAATACTTATTACATCGAGTCGAACCAAGTCATAGACAAGTCCAGCTAATAGTTTTAAGGCGAGCCACTTTGCAGCAGCAACACCCAAATCCAAGCCTTGATTAGTAAAAACCAATCAAGGTTGAGGTTGTTCACGACACTCAAACAGGCATGCCCGTCGGAATACCAACGGGCGCAAGGTGCGTTCAAAGATTCGATGATTCACTGAATTCTGCAATTCACATTACTTATCGCATTTCGCTGCGTTCTTCATCGATGCGAGAGCCAAGAGATCCGTTGTTAAAAGTTTTATTTGTTATAAT…	TGATTTGAGGCCACACAGTAAAGTAGCGTCTCATAGTGAGAACATGATTAGAAGCAGACGGCATCAAGCCTTGGCCAGGTGTTACCCTGTCCCCGATGAATACTTATTACATCGAGTCGAACCAAGTCATAGACAAGTCCAGCTAATAGTTTTAAGGCGAGCCACTTTGCAGCAGCAACACCCAAATCCAAGCCTTGATTAGTAAAA-CCAATCAAGGTTGAGGTTGTTCACGACACTCAAACAGGCATGCCCGTCGGAATACCAACGGGCGCAAGGTGCGTTCAAAGATTCGATGATTCACTGAATTCTGCAATTCACATTACTTATCGCATTTCGCTGCGTTCTTCATCGATGCGAGAGCCAAGAGATCCGTTGTTAAAAGTTTTATTTGTTATAAT…	Basidiomycota	Holtermanniales	Holtermanniella	Holtermanniella
130	B100	MT988278	KX096665.1	CCTTGGCCAGGTGTTACCCTGTCCCCGATGAATACTTATTACATCGAGTCGAACCAAGTCATAGACAAGTCCAGCTAATAGTTTTAAGGCGAGCCACTTTGCAGCAGCAACACCCAAATCCAAGCCTTGATTAGTAAAACCAATCAAGGTTGAGGTTGTTCACGACACTCAAACAGGCATGCCCGTCGGAATACCAACGGGCGCAAGGTGCGTTCAAAGATTCGATGATTCACTGAATTCTGCAATTCACATTACTTATCGCATTTCGCTGCGTTCTTCATCGATGCGAGAGCCAAGAGATCCGTTGTTAAAAGTTTTATTTGTTATAATAATTTACGTTCGTCACAGTTGTAATTAAAGACCCGAAGGCCAACAGTTCACAGGTGTGTATAGATCAGA…	Holtermanniella sp.		KX096665.1 Holtermanniella festucosa isolate RP287_5 internal transcribed spacer 1, partial sequence; 5.8S ribosomal RNA gene and internal transcribed spacer 2, complete sequence; and 28S ribosomal RNA gene, partial sequence	100	426	0	426	0	0	0	CCTTGGCCAGGTGTTACCCTGTCCCCGATGAATACTTATTACATCGAGTCGAACCAAGTCATAGACAAGTCCAGCTAATAGTTTTAAGGCGAGCCACTTTGCAGCAGCAACACCCAAATCCAAGCCTTGATTAGTAAAACCAATCAAGGTTGAGGTTGTTCACGACACTCAAACAGGCATGCCCGTCGGAATACCAACGGGCGCAAGGTGCGTTCAAAGATTCGATGATTCACTGAATTCTGCAATTCACATTACTTATCGCATTTCGCTGCGTTCTTCATCGATGCGAGAGCCAAGAGATCCGTTGTTAAAAGTTTTATTTGTTATAATAATTTACGTTCGTCACAGTTGTAATTAAAGACCCGAAGGCCAACAGTTCACAGGTGTGTATAGATCAGA…	CCTTGGCCAGGTGTTACCCTGTCCCCGATGAATACTTATTACATCGAGTCGAACCAAGTCATAGACAAGTCCAGCTAATAGTTTTAAGGCGAGCCACTTTGCAGCAGCAACACCCAAATCCAAGCCTTGATTAGTAAAACCAATCAAGGTTGAGGTTGTTCACGACACTCAAACAGGCATGCCCGTCGGAATACCAACGGGCGCAAGGTGCGTTCAAAGATTCGATGATTCACTGAATTCTGCAATTCACATTACTTATCGCATTTCGCTGCGTTCTTCATCGATGCGAGAGCCAAGAGATCCGTTGTTAAAAGTTTTATTTGTTATAATAATTTACGTTCGTCACAGTTGTAATTAAAGACCCGAAGGCCAACAGTTCACAGGTGTGTATAGATCAGA…	Basidiomycota	Holtermanniales	Holtermanniella	Holtermanniella
131	B101	MT988279	MK737520.1	TGATTTGAGGCCACACAGTAAAGTAGCGTCTCATAGTGAGAACATGATTAGAAGCAGACGGCATCAAGCCTTGGCCAGGTGTTACCCTGTCCCCGATGAATACTTATTACATCGAGTCGAACCAAGTCATAGACAAGTCCAGCTAATAGTTTTAAGGCGAGCCACTTTGCAGCAGCAACACCCAAATCCAAGCCTTGATTAGTAAAACCAATCAAGGTTGAGGTTGTTCACGACACTCAAACAGGCATGCCCGTCGGAATACCAACGGGCGCAAGGTGCGTTCAAAGATTCGATGATTCACTGAATTCTGCAATTCACATTACTTATCGCATTTCGCTGCGTTCTTCATCGATGCGAGAGCCAAGAGATCCGTTGTTAAAAGTTTTATTTGTTATAATA…	Holtermanniella sp.		MK737520.1 Holtermanniella sp. isolate FBOC004 small subunit ribosomal RNA gene, partial sequence; internal transcribed spacer 1, 5.8S ribosomal RNA gene, and internal transcribed spacer 2, complete sequence; and large subunit ribosomal RNA gene, partial sequence	99.808	522	0	521	1	0	0	TGATTTGAGGCCACACAGTAAAGTAGCGTCTCATAGTGAGAACATGATTAGAAGCAGACGGCATCAAGCCTTGGCCAGGTGTTACCCTGTCCCCGATGAATACTTATTACATCGAGTCGAACCAAGTCATAGACAAGTCCAGCTAATAGTTTTAAGGCGAGCCACTTTGCAGCAGCAACACCCAAATCCAAGCCTTGATTAGTAAAACCAATCAAGGTTGAGGTTGTTCACGACACTCAAACAGGCATGCCCGTCGGAATACCAACGGGCGCAAGGTGCGTTCAAAGATTCGATGATTCACTGAATTCTGCAATTCACATTACTTATCGCATTTCGCTGCGTTCTTCATCGATGCGAGAGCCAAGAGATCCGTTGTTAAAAGTTTTATTTGTTATAATA…	TGATTTGAGGCCACACAGTAAAGTAGCGTCTCATAGTGAGAACATGATTAGAAGCAGACGGCATCAAGCCTTGGCCAGGTGTTACCCTGTCCCCGATGAATACTTATTACATCGAGTCGAACCAAGTCATAGACAAGTCCAGCTAATAGTTTTAAGGCGAGCCACTTTGCAGCAGCAACACCCAAGTCCAAGCCTTGATTAGTAAAACCAATCAAGGTTGAGGTTGTTCACGACACTCAAACAGGCATGCCCGTCGGAATACCAACGGGCGCAAGGTGCGTTCAAAGATTCGATGATTCACTGAATTCTGCAATTCACATTACTTATCGCATTTCGCTGCGTTCTTCATCGATGCGAGAGCCAAGAGATCCGTTGTTAAAAGTTTTATTTGTTATAATA…	Basidiomycota	Holtermanniales	Holtermanniella	Holtermanniella
132	B122	MT988280		TGACTGGCGTTCGGCCGCTCTGATCTATACACACCTGTGAACTGTTGGCCTTCGGGTCTTTAATTACAACTGTGACGAACGTAAATTATTATAACAAATAAAACTTTTAACAACGGATCTCTTGGCTCTCGCATCGATGAAGAACGCAGCGAAATGCGATAAGTAATGTGAATTGCAGAATTCAGTGAATCATCGAATCTTTGAACGCACCTTGCGCCCGTTGGTATTCCGACGGGCATGCCTGTTTGAGTGTCGTGAACAACCTCAACCTTGATTGGTTTTACTAATCAAGGCTTGGATTTGGGTGTTGCTGCTGCAAAGTGGCTCGCCTTAAAACTATTAGCTGGACTTGTCTATGACTTGGTTCGACTCGATGTAATAAGTATTCATCGGGGACAG…	Holtermanniella sp.				531	0	529	0	2	2	TGA-CTGGCGTTCGGCCGCTCTGATCTATACACACCTGTGAACTGTTGGCCTTCGGGTCTTTAATTACAACTGTGACGAACGTAAATTATTATAACAAATAAAACTTTTAACAACGGATCTCTTGGCTCTCGCATCGATGAAGAACGCAGCGAAATGCGATAAGTAATGTGAATTGCAGAATTCAGTGAATCATCGAATCTTTGAACGCACCTTGCGCCCGTTGGTATTCCGACGGGCATGCCTGTTTGAGTGTCGTGAACAACCTCAACCTTGATTGGTTTTACTAATCAAGGCTTGGATTTGGGTGTTGCTGCTGCAAAGTGGCTCGCCTTAAAACTATTAGCTGGACTTGTCTATGACTTGGTTCGACTCGATGTAATAAGTATTCATCGGGGACA…	TGAGCTGGC-TTCGGCCGCTCTGATCTATACACACCTGTGAACTGTTGGCCTTCGGGTCTTTAATTACAACTGTGACGAACGTAAATTATTATAACAAATAAAACTTTTAACAACGGATCTCTTGGCTCTCGCATCGATGAAGAACGCAGCGAAATGCGATAAGTAATGTGAATTGCAGAATTCAGTGAATCATCGAATCTTTGAACGCACCTTGCGCCCGTTGGTATTCCGACGGGCATGCCTGTTTGAGTGTCGTGAACAACCTCAACCTTGATTGGTTTTACTAATCAAGGCTTGGATTTGGGTGTTGCTGCTGCAAAGTGGCTCGCCTTAAAACTATTAGCTGGACTTGTCTATGACTTGGTTCGACTCGATGTAATAAGTATTCATCGGGGACA…	Basidiomycota	Holtermanniales	Holtermanniella	Holtermanniella
133	B123	MT988281	KP714657.1	GGCATCAAGCCTTGGCCAGGTTTAACCCTGTCCCCGATGAATACTTATTACATCGAGTCGAACCAAGTCATAGACAAGTCCAGCTAATAGTTTTAAGGCGAGCCACTTTGCAGCAGCAACACCCAAGTCCAAGCCTTGATGGTAAAACCAATCAAGGTTGAGGTTGTTCACGACACTCAAACAGGCATGCCCGTCGGAATACCAACGGGCGCAAGGTGCGTTCAAAGATTCGATGATTCACTGAATTCTGCAATTCACATTACTTATCGCATTTCGCTGCGTTCTTCATCGATGCGAGAGCCAAGAGATCCGTTGTTAAAAGTTTTATTTGTTATAATAATTTACGTTCGTCACAGTTGTAATTAAAGACCCGAAGGCCAACAGTTCACAGGTGTGTAT…	Holtermanniella sp.		KP714657.1 Basidiomycota sp. MKOTU67 18S ribosomal RNA gene, partial sequence; internal transcribed spacer 1 and 5.8S ribosomal RNA gene, complete sequence; and internal transcribed spacer 2, partial sequence	100	499	0	499	0	0	0	GGCATCAAGCCTTGGCCAGGTTTAACCCTGTCCCCGATGAATACTTATTACATCGAGTCGAACCAAGTCATAGACAAGTCCAGCTAATAGTTTTAAGGCGAGCCACTTTGCAGCAGCAACACCCAAGTCCAAGCCTTGATGGTAAAACCAATCAAGGTTGAGGTTGTTCACGACACTCAAACAGGCATGCCCGTCGGAATACCAACGGGCGCAAGGTGCGTTCAAAGATTCGATGATTCACTGAATTCTGCAATTCACATTACTTATCGCATTTCGCTGCGTTCTTCATCGATGCGAGAGCCAAGAGATCCGTTGTTAAAAGTTTTATTTGTTATAATAATTTACGTTCGTCACAGTTGTAATTAAAGACCCGAAGGCCAACAGTTCACAGGTGTGTAT…	GGCATCAAGCCTTGGCCAGGTTTAACCCTGTCCCCGATGAATACTTATTACATCGAGTCGAACCAAGTCATAGACAAGTCCAGCTAATAGTTTTAAGGCGAGCCACTTTGCAGCAGCAACACCCAAGTCCAAGCCTTGATGGTAAAACCAATCAAGGTTGAGGTTGTTCACGACACTCAAACAGGCATGCCCGTCGGAATACCAACGGGCGCAAGGTGCGTTCAAAGATTCGATGATTCACTGAATTCTGCAATTCACATTACTTATCGCATTTCGCTGCGTTCTTCATCGATGCGAGAGCCAAGAGATCCGTTGTTAAAAGTTTTATTTGTTATAATAATTTACGTTCGTCACAGTTGTAATTAAAGACCCGAAGGCCAACAGTTCACAGGTGTGTAT…	Basidiomycota	Holtermanniales	Holtermanniella	Holtermanniella
134	B130	MT988282	JN636812.1	GCCACACAGTAAGTAGCGTCTCATAGTGAGAACATGATTAGAAGCAGACGGCATCAAGCCTTGGCCAGGTGTTACCCTGTCCCCGATGAATACTTATTACATCGAGTCGAACCAAGTCATAGACAAGTCCAGCTAATAGTTTTAAGGCGAGCCACTTTGCAGCAGCAACACCCAAATCCAAGCCTTGATTAGTAAAAACCAATCAAGGTTGAGGTTGTTCACGACACTCAAACAGGCATGCCCGTCGGAATACCAACGGGCGCAAGGTGCGTTCAAAGATTCGATGATTCACTGAATTCTGCAATTCACATTACTTATCGCATTTCGCTGCGTTCTTCATCGATGCGAGAGCCAAGAGATCCGTTGTTAAAAGTTTTATTTGTTATAATAATTTACGTT…	Holtermanniella sp.		JN636812.1 Holtermanniella sp. G4 internal transcribed spacer 1, partial sequence; 5.8S ribosomal RNA gene, complete sequence; and internal transcribed spacer 2, partial sequence	99.247	531	0	527	1	3	3	GCCACACAG-T-AAGTAGCGTCTCATAGTGAGAACATGATTAGAAGCAGACGGCATCAAGCCTTGGCCAGGTGTTACCCTGTCCCCGATGAATACTTATTACATCGAGTCGAACCAAGTCATAGACAAGTCCAGCTAATAGTTTTAAGGCGAGCCACTTTGCAGCAGCAACACCCAAATCCAAGCCTTGATTAGTAAAAACCAATCAAGGTTGAGGTTGTTCACGACACTCAAACAGGCATGCCCGTCGGAATACCAACGGGCGCAAGGTGCGTTCAAAGATTCGATGATTCACTGAATTCTGCAATTCACATTACTTATCGCATTTCGCTGCGTTCTTCATCGATGCGAGAGCCAAGAGATCCGTTGTTAAAAGTTTTATTTGTTATAATAATTTACG…	GCCACACAGNTAAAGTAGCGTCTCATAGTGAGAACATGATTAGAAGCAGACGGCATCAAGCCTTGGCCAGGTGTTACCCTGTCCCCGATGAATACTTATTACATCGAGTCGAACCAAGTCATAGACAAGTCCAGCTAATAGTTTTAAGGCGAGCCACTTTGCAGCAGCAACACCCAAATCCAAGCCTTGATTAGTAAAA-CCAATCAAGGTTGAGGTTGTTCACGACACTCAAACAGGCATGCCCGTCGGAATACCAACGGGCGCAAGGTGCGTTCAAAGATTCGATGATTCACTGAATTCTGCAATTCACATTACTTATCGCATTTCGCTGCGTTCTTCATCGATGCGAGAGCCAAGAGATCCGTTGTTAAAAGTTTTATTTGTTATAATAATTTACG…	Basidiomycota	Holtermanniales	Holtermanniella	Holtermanniella
135	B151	MT988283		CACAGTAAAGTAGCGTCTCATAGTGAGAACATGATTAGAAGCMGACGGCATCAAGCCTTGGCCAGGTTTAACCCTGTCCCCGATGAATACTTATTACATCGAGTCGAACCAAGTCATAGACAAGTCCAGCTAATAGTTTTAAGGCGAGCCACTTTGCAGCAGCAACACCCAAGTCCAAGCCTTGATGGTAAAACCAATCAAGGTTGAGGTTGTTCACGACACTCAAACAGGCATGCCCGTCGGAATACCAACGGGCGCAAGGTGCGTTCAAAGATTCGATGATTCACTGAATTCTGCAATTCACATTACTTATCGCATTTCGCTGCGTTCTTCATCGATGCGAGAGCCAAGAGATCCGTTGTTAAAAGTTTTATTTGTTATAATAATTTACGTTCGTCA…	Holtermanniella sp.				544	0	543	1	0	0	CACAGTAAAGTAGCGTCTCATAGTGAGAACATGATTAGAAGCMGACGGCATCAAGCCTTGGCCAGGTTTAACCCTGTCCCCGATGAATACTTATTACATCGAGTCGAACCAAGTCATAGACAAGTCCAGCTAATAGTTTTAAGGCGAGCCACTTTGCAGCAGCAACACCCAAGTCCAAGCCTTGATGGTAAAACCAATCAAGGTTGAGGTTGTTCACGACACTCAAACAGGCATGCCCGTCGGAATACCAACGGGCGCAAGGTGCGTTCAAAGATTCGATGATTCACTGAATTCTGCAATTCACATTACTTATCGCATTTCGCTGCGTTCTTCATCGATGCGAGAGCCAAGAGATCCGTTGTTAAAAGTTTTATTTGTTATAATAATTTACGTTCGTCA…	CACAGTAAAGTAGCGTCTCATAGTGAGAACATGATTAGAAGCAGACGGCATCAAGCCTTGGCCAGGTTTAACCCTGTCCCCGATGAATACTTATTACATCGAGTCGAACCAAGTCATAGACAAGTCCAGCTAATAGTTTTAAGGCGAGCCACTTTGCAGCAGCAACACCCAAGTCCAAGCCTTGATGGTAAAACCAATCAAGGTTGAGGTTGTTCACGACACTCAAACAGGCATGCCCGTCGGAATACCAACGGGCGCAAGGTGCGTTCAAAGATTCGATGATTCACTGAATTCTGCAATTCACATTACTTATCGCATTTCGCTGCGTTCTTCATCGATGCGAGAGCCAAGAGATCCGTTGTTAAAAGTTTTATTTGTTATAATAATTTACGTTCGTCA…	Basidiomycota	Holtermanniales	Holtermanniella	Holtermanniella
136	B179	MT988284		AGCCTTGGCCAGGTTTAACCCTGTCCCCGATGAATACTTATTACATCGAGTCGAACCAAGTCATAGACAAGTCCAGCTAATAGTTTTAAGGCGAGCCACTTTGCAGCAGCAACACCCAAGTCCAAGCCTTGATGGTAAAACCAATCAAGGTTGAGGTTGTTCACGACACTCAAACAGGCATGCCCGTCGGAATACCAACGGGCGCAAGGTGCGTTCAAAGATTCGATGATTCACTGAATTCTGCAATTCACATTACTTATCGCATTTCGCTGCGTTCTTCATCGATGCGAGAGCCAAGAGATCCGTTGTTAAAAGTTTTATTTGTTATAATAATTTACGTTCGTCACAGTTGTAATTAAAGACCCGAAGGCCAACAGTTCACAGGTGTGTATAGATCAG…	Holtermanniella sp.				478	0	478	0	0	0	AGCCTTGGCCAGGTTTAACCCTGTCCCCGATGAATACTTATTACATCGAGTCGAACCAAGTCATAGACAAGTCCAGCTAATAGTTTTAAGGCGAGCCACTTTGCAGCAGCAACACCCAAGTCCAAGCCTTGATGGTAAAACCAATCAAGGTTGAGGTTGTTCACGACACTCAAACAGGCATGCCCGTCGGAATACCAACGGGCGCAAGGTGCGTTCAAAGATTCGATGATTCACTGAATTCTGCAATTCACATTACTTATCGCATTTCGCTGCGTTCTTCATCGATGCGAGAGCCAAGAGATCCGTTGTTAAAAGTTTTATTTGTTATAATAATTTACGTTCGTCACAGTTGTAATTAAAGACCCGAAGGCCAACAGTTCACAGGTGTGTATAGATCAG…	AGCCTTGGCCAGGTTTAACCCTGTCCCCGATGAATACTTATTACATCGAGTCGAACCAAGTCATAGACAAGTCCAGCTAATAGTTTTAAGGCGAGCCACTTTGCAGCAGCAACACCCAAGTCCAAGCCTTGATGGTAAAACCAATCAAGGTTGAGGTTGTTCACGACACTCAAACAGGCATGCCCGTCGGAATACCAACGGGCGCAAGGTGCGTTCAAAGATTCGATGATTCACTGAATTCTGCAATTCACATTACTTATCGCATTTCGCTGCGTTCTTCATCGATGCGAGAGCCAAGAGATCCGTTGTTAAAAGTTTTATTTGTTATAATAATTTACGTTCGTCACAGTTGTAATTAAAGACCCGAAGGCCAACAGTTCACAGGTGTGTATAGATCAG…	Basidiomycota	Holtermanniales	Holtermanniella	Holtermanniella
137	B180	MT988285		TGAGCTGGCTTCGGCCGCTCTGATCTATACACACCTGTGAACTGTTGGCCTTCGGGTCTTTAATTACAACTGTGACGAACGTAAATTATTATAACAAATAAAACTTTTAACAACGGATCTCTTGGCTCTCGCATCGATGAAGAACGCAGCGAAATGCGATAAGTAATGTGAATTGCAGAATTCAGTGAATCATCGAATCTTTGAACGCACCTTGCGCCCGTTGGTATTCCGACGGGCATGCCTGTTTGAGTGTCGTGAACAACCTCAACCTTGATTGGTTTTACCATCAAGGCTTGGACTTGGGTGTTGCTGCTGCAAAGTGGCTCGCCTTAAAACTATTAGCTGGACTTGTCTATGACTTGGTTCGACTCGATGTAATAAGTATTCATCGGGGACAGG…	Holtermanniella sp.				529	0	529	0	0	0	TGAGCTGGCTTCGGCCGCTCTGATCTATACACACCTGTGAACTGTTGGCCTTCGGGTCTTTAATTACAACTGTGACGAACGTAAATTATTATAACAAATAAAACTTTTAACAACGGATCTCTTGGCTCTCGCATCGATGAAGAACGCAGCGAAATGCGATAAGTAATGTGAATTGCAGAATTCAGTGAATCATCGAATCTTTGAACGCACCTTGCGCCCGTTGGTATTCCGACGGGCATGCCTGTTTGAGTGTCGTGAACAACCTCAACCTTGATTGGTTTTACCATCAAGGCTTGGACTTGGGTGTTGCTGCTGCAAAGTGGCTCGCCTTAAAACTATTAGCTGGACTTGTCTATGACTTGGTTCGACTCGATGTAATAAGTATTCATCGGGGACAGG…	TGAGCTGGCTTCGGCCGCTCTGATCTATACACACCTGTGAACTGTTGGCCTTCGGGTCTTTAATTACAACTGTGACGAACGTAAATTATTATAACAAATAAAACTTTTAACAACGGATCTCTTGGCTCTCGCATCGATGAAGAACGCAGCGAAATGCGATAAGTAATGTGAATTGCAGAATTCAGTGAATCATCGAATCTTTGAACGCACCTTGCGCCCGTTGGTATTCCGACGGGCATGCCTGTTTGAGTGTCGTGAACAACCTCAACCTTGATTGGTTTTACCATCAAGGCTTGGACTTGGGTGTTGCTGCTGCAAAGTGGCTCGCCTTAAAACTATTAGCTGGACTTGTCTATGACTTGGTTCGACTCGATGTAATAAGTATTCATCGGGGACAGG…	Basidiomycota	Holtermanniales	Holtermanniella	Holtermanniella
138	B186	MT988286	KC753411.1	GTAAAGTAGCGTCTCATAGTGAGAACATGATTAGAAGCAGACSGCATCAAGCCTTGGCCAGGTGTTACCCTGTCCCCGATGAATACTTATTACATCGAGTCGAACCAAGTCATAGACAAGTCCAGCTAATAGTTTTAAGGCGAGCCACTTTGCAGCAGCAACACCCAAATCCAAGCCTTGATTAGTAAAACCAATCAAGGTTGAGGTTGTTCACGACACTCAAACAGGCATGCCCGTCGGAATACCAACGGGCGCAAGGTGCGTTCAAAGATTCGATGATTCACTGAATTCTGCAATTCACATTACTTATCGCATTTCGCTGCGTTCTTCATCGATGCGAGAGCCAAGAGATCCGTTGTTAAAAGTTTTATTTGTTATAATAATTTACGTTCGTCACAG…	Holtermanniella sp.		KC753411.1 Uncultured Holtermanniella clone N2_6 18S ribosomal RNA gene, partial sequence; internal transcribed spacer 1, 5.8S ribosomal RNA gene, and internal transcribed spacer 2, complete sequence; and 28S ribosomal RNA gene, partial sequence	99.076	541	0	536	4	1	1	GTAAAGTAGCGTCTCATAGTGAGAACATGATTAGAAGCAGACSGCATCAAGCCTTGGCCAGGTGTTACCCTGTCCCCGATGAATACTTATTACATCGAGTCGAACCAAGTCATAGACAAGTCCAGCTAATAGTTTTAAGGCGAGCCACTTTGCAGCAGCAACACCCAAATCCAAGCCTTGATTAGTAAAACCAATCAAGGTTGAGGTTGTTCACGACACTCAAACAGGCATGCCCGTCGGAATACCAACGGGCGCAAGGTGCGTTCAAAGATTCGATGATTCACTGAATTCTGCAATTCACATTACTTATCGCATTTCGCTGCGTTCTTCATCGATGCGAGAGCCAAGAGATCCGTTGTTAAAAGTTTTATTTGTTATAATAATTTACGTTCGTCACAG…	GTAAAGTAGCGTCTCATAGTGAGAACATGATTAGAAGCAGACTGCATCAAGCCTTGGCCAGGTGTTACCCTGTCCCTGATGAATACTTATTACATCGAGTCGAACCAAGTCATAGACAAGTCCAGCTAATAGTTTTAAGGCGAGCCACTTTGCAGCAGCAACACCCAAGTCCAAGCCTTGATTAGTAAAACCAATCAAGGTTGAGGTTGTCCACGACACTCAAACAGGCATGCCCGTCGGAATACCAACGGGCGCAAGGTGCGTTCAAAGATTCGATGATTCACTGAATTCTGCAATTCACATTACTTATCGCATTTCGCTGCGTTCTTCATCGATGCGAGAGCCAAGAGATCCGTTGTTAAAAGTTTTATTTGTTATAATAATTTACGTTCGTCACAG…	Basidiomycota	Holtermanniales	Holtermanniella	Holtermanniella
139	B187	MT988287		GTAAAGTAGCGTCTCATAGTGAGAACATGATTAGAAGCAGACGGCATCAAGCCTTGGCCAGGTGTTACCCTGTCCCCGATGAATACTTATTACATCGAGTCGAACCAAGTCATAGACAAGTCCAGCTAATAGTTTTAAGGCGAGCCACTTTGCAGCAGCAACACCCAAATCCAAGCCTTGATTAGTAAAACCAATCAAGGTTGAGGTTGTTCACGACACTCAAACAGGCATGCCCGTCGGAATACCAACGGGCGCAAGGTGCGTTCAAAGATTCGATGATTCACTGAATTCTGCAATTCACATTACTTATCGCATTTCGCTGCGTTCTTCATCGATGCGAGAGCCAAGAGATCCGTTGTTAAAAGTTTTATTTGTTATAATAATTTACGTTCGTCACAG…	Holtermanniella sp.				529	0	525	4	0	0	GTAAAGTAGCGTCTCATAGTGAGAACATGATTAGAAGCAGACGGCATCAAGCCTTGGCCAGGTGTTACCCTGTCCCCGATGAATACTTATTACATCGAGTCGAACCAAGTCATAGACAAGTCCAGCTAATAGTTTTAAGGCGAGCCACTTTGCAGCAGCAACACCCAAATCCAAGCCTTGATTAGTAAAACCAATCAAGGTTGAGGTTGTTCACGACACTCAAACAGGCATGCCCGTCGGAATACCAACGGGCGCAAGGTGCGTTCAAAGATTCGATGATTCACTGAATTCTGCAATTCACATTACTTATCGCATTTCGCTGCGTTCTTCATCGATGCGAGAGCCAAGAGATCCGTTGTTAAAAGTTTTATTTGTTATAATAATTTACGTTCGTCACAG…	GTAAAGTAGCGTCTCATAGTGAGAACATGATTAGAAGCAGACTGCATCAAGCCTTGGCCAGGTGTTACCCTGTCCCTGATGAATACTTATTACATCGAGTCGAACCAAGTCATAGACAAGTCCAGCTAATAGTTTTAAGGCGAGCCACTTTGCAGCAGCAACACCCAAGTCCAAGCCTTGATTAGTAAAACCAATCAAGGTTGAGGTTGTCCACGACACTCAAACAGGCATGCCCGTCGGAATACCAACGGGCGCAAGGTGCGTTCAAAGATTCGATGATTCACTGAATTCTGCAATTCACATTACTTATCGCATTTCGCTGCGTTCTTCATCGATGCGAGAGCCAAGAGATCCGTTGTTAAAAGTTTTATTTGTTATAATAATTTACGTTCGTCACAG…	Basidiomycota	Holtermanniales	Holtermanniella	Holtermanniella
140	G1_002	MT988288	JX188167.1	CTACCTGATTTGAGGCCACACAGTAAGTAGCGTCTCATAGTGAGAACATGATTAGAAGCAGACGGCATCAAGCCTTGGCCAGGTTTAACCCTGTCCCCGATGAATACTTATTACATCGAGTCGAACCAAGTCATAGACAAGTCCAGCTAATAGTTTTAAGGCGAGCCACTTTGCAGCAGCAACACCCAAGTCCAAGCCTTGATGGTAAAACCAATCAAGGTTGAGGTTGTTCACGACACTCAAACAGGCATGCCCGTCGGAATACCAACGGGCGCAAGGTGCGTTCAAAGATTCGATGATTCACTGAATTCTGCAATTCACATTACTTATCGCATTTCGCTGCGTTCTTCATCGATGCGAGAGCCAAGAGATCCGTTGTTAAAAGTTTTATTTGTTATA…	Holtermanniella sp.		JX188167.1 Holtermanniella festucosa strain P40D005 small subunit ribosomal RNA gene, partial sequence; internal transcribed spacer 1, 5.8S ribosomal RNA gene, and internal transcribed spacer 2, complete sequence; and large subunit ribosomal RNA gene, partial sequence	99.24	526	0	522	3	1	1	CTACCTGATTTGAGGCCACACAGTAA-GTAGCGTCTCATAGTGAGAACATGATTAGAAGCAGACGGCATCAAGCCTTGGCCAGGTTTAACCCTGTCCCCGATGAATACTTATTACATCGAGTCGAACCAAGTCATAGACAAGTCCAGCTAATAGTTTTAAGGCGAGCCACTTTGCAGCAGCAACACCCAAGTCCAAGCCTTGATGGTAAAACCAATCAAGGTTGAGGTTGTTCACGACACTCAAACAGGCATGCCCGTCGGAATACCAACGGGCGCAAGGTGCGTTCAAAGATTCGATGATTCACTGAATTCTGCAATTCACATTACTTATCGCATTTCGCTGCGTTCTTCATCGATGCGAGAGCCAAGAGATCCGTTGTTAAAAGTTTTATTTGTTAT…	CTACCTGATTTGAGGCCACACAGTAAAGTAGCGTCTCATAGTGAGAACATGATTAGAAGCAGACGGCATCAAGCCTTGGCCAGGTTTAACCCTGTCCCCGATGAATACTTATTACATCGAGTCGAACCAAGTCATAGACAAGTCCAGCTAATAGTTTTAAGGCGAGCCACTTTGCAGCAGCAACACCCAAGTCCAAGCCTTGATGGTAAAACCAATCAAGGTTGAGGTTGTTCACGACACTCAAACAGGCATGCCCGTCGGAATACCAACGGGCGCAAGGTGCGTTCAAAGATTCGATGATTCACTGAATTCTGCAATTCACATTACTTATCGCATTTCGCTGCGTTCTTCATCGATGCGAGAGCCAAGAGATCCGTTGTTAAAAGTTTTATTGATTAT…	Basidiomycota	Holtermanniales	Holtermanniella	Holtermanniella
141	G1_003	MT988289	MK782397.1	AGTAGCGTCTCATAGTGAGAACATGATTAGAAGCAGACGGCATCAAGCCTTGGCCAGGTGTTACCCTGTCCCCGATGAATACTTATTACATCGAGTCGAACCAAGTCATAGACAAGTCCAGCTAATAGTTTTAAGGCGAGCCACTTTGCAGCAGCAACACCCAAGTCCAAGCCTTGATTAGTAAAACCAATCAAGGTTGAGGTTGTTCACGACACTCAAACAGGCATGCCCGTCGGAATACCAACGGGCGCAAGGTGCGTTCAAAGATTCGATGATTCACTGAATTCTGCAATTCACATTACTTATCGCATTTCGCTGCGTTCTTCATCGATGCGAGAGCCAAGAGATCCGTTGTTAAAAGTTTTATTTGTTATAATAATTTACGTTCGTCACAGTTGT…	Holtermanniella sp.		MK782397.1 Holtermanniella takashimae isolate NWHC 46749_2_1SD small subunit ribosomal RNA gene, partial sequence; internal transcribed spacer 1 and 5.8S ribosomal RNA gene, complete sequence; and internal transcribed spacer 2, partial sequence	99.801	502	0	501	0	1	1	AGTAGCG-TCTCATAGTGAGAACATGATTAGAAGCAGACGGCATCAAGCCTTGGCCAGGTGTTACCCTGTCCCCGATGAATACTTATTACATCGAGTCGAACCAAGTCATAGACAAGTCCAGCTAATAGTTTTAAGGCGAGCCACTTTGCAGCAGCAACACCCAAGTCCAAGCCTTGATTAGTAAAACCAATCAAGGTTGAGGTTGTTCACGACACTCAAACAGGCATGCCCGTCGGAATACCAACGGGCGCAAGGTGCGTTCAAAGATTCGATGATTCACTGAATTCTGCAATTCACATTACTTATCGCATTTCGCTGCGTTCTTCATCGATGCGAGAGCCAAGAGATCCGTTGTTAAAAGTTTTATTTGTTATAATAATTTACGTTCGTCACAGTTG…	AGTAGCGCTCTCATAGTGAGAACATGATTAGAAGCAGACGGCATCAAGCCTTGGCCAGGTGTTACCCTGTCCCCGATGAATACTTATTACATCGAGTCGAACCAAGTCATAGACAAGTCCAGCTAATAGTTTTAAGGCGAGCCACTTTGCAGCAGCAACACCCAAGTCCAAGCCTTGATTAGTAAAACCAATCAAGGTTGAGGTTGTTCACGACACTCAAACAGGCATGCCCGTCGGAATACCAACGGGCGCAAGGTGCGTTCAAAGATTCGATGATTCACTGAATTCTGCAATTCACATTACTTATCGCATTTCGCTGCGTTCTTCATCGATGCGAGAGCCAAGAGATCCGTTGTTAAAAGTTTTATTTGTTATAATAATTTACGTTCGTCACAGTTG…	Basidiomycota	Holtermanniales	Holtermanniella	Holtermanniella
142	G1_005	MT988290	KM816683.1	ATCGTACATGATTTGAGGCCACACAGTAAAGTAGCGTCTCATAGTGAGAACATGATTAGAAGCAGACGGCATCAAGCCTTGGCCAGGTGTTACCCTGTCCCCGATGAATACTTATTACATCGAGTCGAACCAAGTCATAGACAAGTCCAGCTAATAGTTTTAAGGCGAGCCACTTTGCAGCAGCAACACCCAAGTCCAAGCCTTGATTAGTAAAACCAATCAAGGTTGAGGTTGTTCACGACACTCAAACAGGCATGCCCGTCGGAATACCAACGGGCGCAAGGTGCGTTCAAAGATTCGATGATTCACTGAATTCTGCAATTCACATTACTTATCGCATTTCGCTGCGTTCTTCATCGATGCGAGAGCCAAGAGATCCGTTGTTAAAAGTTTTATTTG…	Holtermanniella sp.		KM816683.1 Holtermanniella nyarrowii strain LKF08-137 18S ribosomal RNA gene, partial sequence; internal transcribed spacer 1, 5.8S ribosomal RNA gene, and internal transcribed spacer 2, complete sequence; and 28S ribosomal RNA gene, partial sequence	99.434	530	0	527	3	0	0	ATCGTACATGATTTGAGGCCACACAGTAAAGTAGCGTCTCATAGTGAGAACATGATTAGAAGCAGACGGCATCAAGCCTTGGCCAGGTGTTACCCTGTCCCCGATGAATACTTATTACATCGAGTCGAACCAAGTCATAGACAAGTCCAGCTAATAGTTTTAAGGCGAGCCACTTTGCAGCAGCAACACCCAAGTCCAAGCCTTGATTAGTAAAACCAATCAAGGTTGAGGTTGTTCACGACACTCAAACAGGCATGCCCGTCGGAATACCAACGGGCGCAAGGTGCGTTCAAAGATTCGATGATTCACTGAATTCTGCAATTCACATTACTTATCGCATTTCGCTGCGTTCTTCATCGATGCGAGAGCCAAGAGATCCGTTGTTAAAAGTTTTATTTG…	ATCCTACCTGATTTGAGGCCACACAGTAAAGTAGCGTCTCATAGTGAGAACATGATTAGAAGCAGACGGCATCAAGCCTTGGCCAGGTGTTACCCTGTCCCCGATGAATACTTATTACATCGAGTCGAACCAAGTCATAGACAAGTCCAGCTAATAGTTTTAAGGCGAGCCACTTTGCAGCAGCAACACCCAAGTCCAAGCCTTGATTAGTAAAACCAATCAAGGTTGAGGTTGTTCACGACACTCAAACAGGCATGCCCGTCGGAATACCAACGGGCGCAAGGTGCGTTCAAAGATTCGATGATTCACTGAATTCTGCAATTCACATTACTTATCGCATTTCGCTGCGTTCTTCATCGATGCGAGAGCCAAGAGATCCGTTGTTAAAAGTTTTATTTG…	Basidiomycota	Holtermanniales	Holtermanniella	Holtermanniella
143	B154	MT988291	NR_073286.1	GTCTAATCTAAAGTTGACTAAAGTAGTTGGAAGCTTCTACTGAGAYCTYATTCGGCCACACTGCAAGAGCGTGTCCTCAGCGAATAGTCTATTACACTGAGTCAATCCGAGTTCGAATTAGAGATGCTAATATATTACGAACGAGCTCGATCCGAGGACCAGCAACGCTCAAAATCCAAACACCTGTCAGTCTACAAGAAACTGGAGGGTTGAAGAGTTCATGACACTCAAACAGACATGCTCCCCGGAATACCAGGGAGCGCAAGGTGCGTTCAAAGATTCGATGATTCACTGAATTCTGCAATTCACATTACTTATCACATTTCGCTGCGTTCTTCATCGATGAGCAAGCCAAGAGATCCGTTGTTGAAAGTTTTTTTTGTTTCGATATTTCGTTAC…	Leucosporidium aff. muscorum		NR_073286.1 Leucosporidium muscorum CBS 6921 ITS region; from TYPE material >AF444527.1 Leucosporidium muscorum strain CBS 6921 18S ribosomal RNA gene, partial sequence; internal transcribed spacer 1, 5.8S ribosomal RNA gene, and internal transcribed spacer 2, complete sequence; and 28S ribosomal RNA gene, partial sequence	99.641	557	0	555	2	0	0	GTCTAATCTAAAGTTGACTAAAGTAGTTGGAAGCTTCTACTGAGAYCTYATTCGGCCACACTGCAAGAGCGTGTCCTCAGCGAATAGTCTATTACACTGAGTCAATCCGAGTTCGAATTAGAGATGCTAATATATTACGAACGAGCTCGATCCGAGGACCAGCAACGCTCAAAATCCAAACACCTGTCAGTCTACAAGAAACTGGAGGGTTGAAGAGTTCATGACACTCAAACAGACATGCTCCCCGGAATACCAGGGAGCGCAAGGTGCGTTCAAAGATTCGATGATTCACTGAATTCTGCAATTCACATTACTTATCACATTTCGCTGCGTTCTTCATCGATGAGCAAGCCAAGAGATCCGTTGTTGAAAGTTTTTTTTGTTTCGATATTTCGTTAC…	GTCTAATCTAAAGTTGACTAAAGTAGTTGGAAGCTTCTACTGAGATCTCATTCGGCCACACTGCAAGAGCGTGTCCTCAGCGAATAGTCTATTACACTGAGTCAATCCGAGTTCGAATTAGAGATGCTAATATATTACGAACGAGCTCGATCCGAGGACCAGCAACGCTCAAAATCCAAACACCTGTCAGTCTACAAGAAACTGGAGGGTTGAAGAGTTCATGACACTCAAACAGACATGCTCCCCGGAATACCAGGGAGCGCAAGGTGCGTTCAAAGATTCGATGATTCACTGAATTCTGCAATTCACATTACTTATCACATTTCGCTGCGTTCTTCATCGATGAGCAAGCCAAGAGATCCGTTGTTGAAAGTTTTTTTTGTTTCGATATTTCGTTAC…	Basidiomycota	Leucosporidiales	Leucosporidium	Leucosporidium
144	B155	MT988292	NR_073286.1	TTAGCGCATCTACTTGTAGAGCGTGACCTCCACTTTCTAACTCTGTGCATTTATTGGCGGAAGAGACTTGAGCAATCGAGTCTTCTTCTCGCGGCTCATTTTATAACACTAGTTAAAGTATGTAACGAAATATCGAAACAAAAAAAACTTTCAACAACGGATCTCTTGGCTTGCTCATCGATGAAGAACGCAGCGAAATGTGATAAGTAATGTGAATTGCAGAATTCAGTGAATCATCGAATCTTTGAACGCACCTTGCGCTCCCTGGTATTCCGGGGAGCATGTCTGTTTGAGTGTCATGAACTCTTCAACCCTCCAGTTTCTTGTAGACTGACAGGTGTTTGGATTTTGAGCGTTGCTGGTCCTCGGATCGAGCTCGTTCGTAATATATTAGCATCT…	Leucosporidium aff. muscorum		NR_073286.1 Leucosporidium muscorum CBS 6921 ITS region; from TYPE material >AF444527.1 Leucosporidium muscorum strain CBS 6921 18S ribosomal RNA gene, partial sequence; internal transcribed spacer 1, 5.8S ribosomal RNA gene, and internal transcribed spacer 2, complete sequence; and 28S ribosomal RNA gene, partial sequence	100	574	0	574	0	0	0	TTAGCGCATCTACTTGTAGAGCGTGACCTCCACTTTCTAACTCTGTGCATTTATTGGCGGAAGAGACTTGAGCAATCGAGTCTTCTTCTCGCGGCTCATTTTATAACACTAGTTAAAGTATGTAACGAAATATCGAAACAAAAAAAACTTTCAACAACGGATCTCTTGGCTTGCTCATCGATGAAGAACGCAGCGAAATGTGATAAGTAATGTGAATTGCAGAATTCAGTGAATCATCGAATCTTTGAACGCACCTTGCGCTCCCTGGTATTCCGGGGAGCATGTCTGTTTGAGTGTCATGAACTCTTCAACCCTCCAGTTTCTTGTAGACTGACAGGTGTTTGGATTTTGAGCGTTGCTGGTCCTCGGATCGAGCTCGTTCGTAATATATTAGCATCT…	TTAGCGCATCTACTTGTAGAGCGTGACCTCCACTTTCTAACTCTGTGCATTTATTGGCGGAAGAGACTTGAGCAATCGAGTCTTCTTCTCGCGGCTCATTTTATAACACTAGTTAAAGTATGTAACGAAATATCGAAACAAAAAAAACTTTCAACAACGGATCTCTTGGCTTGCTCATCGATGAAGAACGCAGCGAAATGTGATAAGTAATGTGAATTGCAGAATTCAGTGAATCATCGAATCTTTGAACGCACCTTGCGCTCCCTGGTATTCCGGGGAGCATGTCTGTTTGAGTGTCATGAACTCTTCAACCCTCCAGTTTCTTGTAGACTGACAGGTGTTTGGATTTTGAGCGTTGCTGGTCCTCGGATCGAGCTCGTTCGTAATATATTAGCATCT…	Basidiomycota	Leucosporidiales	Leucosporidium	Leucosporidium
145	B066	MT988293	NR_111080.1	TCTGATCTGAGGTCTAATCTTAAAATGACTAGAAGGGTTAGAAGCTTCTACAATTATCTTATTCGGCCACACTAGGTGTGTCCTCAGCGAATAGTCTATTACACTGAGTCAATCCGAATTCGAATTAGAGATGCTCATATATTACGAATGAGCTCAGTCACAAGGACGAGCAACACTCAGAAACCAAACACCAGCCAGTTTACAAGAAACCGGTGGGTTGAAGAGTTCATGACACTCAAACAGACATGCTCCCCGGAATACCAGGGAGCGCAAGGTGCGTTCAAAGATTCGATGATTCACTGAATTCTGCAATTCACATTACTTATCACATTTCGCTGCGTTCTTCATCGATGCGAGAGCCAAGAGATCCGTTGTTGAAAGTTTTTTTTTGTTTCGATA…	Sampaiozyma aff. ingeniosa		NR_111080.1 Sampaiozyma ingeniosa CBS 4240 ITS region; from TYPE material >AF444534.1 Sampaiozyma ingeniosa strain CBS 4240 18S ribosomal RNA gene, partial sequence; internal transcribed spacer 1, 5.8S ribosomal RNA gene, and internal transcribed spacer 2, complete sequence; and 28S ribosomal RNA gene, partial sequence	100	558	0	558	0	0	0	TCTGATCTGAGGTCTAATCTTAAAATGACTAGAAGGGTTAGAAGCTTCTACAATTATCTTATTCGGCCACACTAGGTGTGTCCTCAGCGAATAGTCTATTACACTGAGTCAATCCGAATTCGAATTAGAGATGCTCATATATTACGAATGAGCTCAGTCACAAGGACGAGCAACACTCAGAAACCAAACACCAGCCAGTTTACAAGAAACCGGTGGGTTGAAGAGTTCATGACACTCAAACAGACATGCTCCCCGGAATACCAGGGAGCGCAAGGTGCGTTCAAAGATTCGATGATTCACTGAATTCTGCAATTCACATTACTTATCACATTTCGCTGCGTTCTTCATCGATGCGAGAGCCAAGAGATCCGTTGTTGAAAGTTTTTTTTTGTTTCGATA…	TCTGATCTGAGGTCTAATCTTAAAATGACTAGAAGGGTTAGAAGCTTCTACAATTATCTTATTCGGCCACACTAGGTGTGTCCTCAGCGAATAGTCTATTACACTGAGTCAATCCGAATTCGAATTAGAGATGCTCATATATTACGAATGAGCTCAGTCACAAGGACGAGCAACACTCAGAAACCAAACACCAGCCAGTTTACAAGAAACCGGTGGGTTGAAGAGTTCATGACACTCAAACAGACATGCTCCCCGGAATACCAGGGAGCGCAAGGTGCGTTCAAAGATTCGATGATTCACTGAATTCTGCAATTCACATTACTTATCACATTTCGCTGCGTTCTTCATCGATGCGAGAGCCAAGAGATCCGTTGTTGAAAGTTTTTTTTTGTTTCGATA…	Basidiomycota	Microbotryomycetes	Chrysozymaceae	Sampaiozyma
146	B197	MT988294	NR_111077.1	AATCTAAAGTTGACTAATAGAATTAGAAGCTTCTACTTTACAAAACTCGGCCACTCCCGAAAGAGCGTCCTCAGCGAATAGTCTATTACACTGAGTCAATCCGATTTTCGAATATGAGATGCTAATCATTTACGAACGAGCTTCGCCAATAAAGGCCAGCAAGCGTTCAAAATCCAAACACTAATCCGATTTACTAGAAATCGGTAGGTTGAAGAGTTCATGACACTCAAACAGACATGCTCTCCGGAATACCAGAGAGCGCAAGGTGCGTTCAAAGATTCGATGATTCACTGAATTCTGCAATTCACATTACTTATCACATTTCGCTGCGTTCTTCATCGATGCGAGAGCCAAGAGATCCGTTGTTGAAAGTTTTTTTTGTTTTGTTTTTATATACAT…	Curvibasidium aff. cygneicollum		NR_111077.1 Curvibasidium cygneicollum CBS 4551 ITS region; from synonym TYPE material >AF444490.1 Curvibasidium cygneicollum strain CBS 4551 18S ribosomal RNA gene, partial sequence; internal transcribed spacer 1, 5.8S ribosomal RNA gene, and internal transcribed spacer 2, complete sequence; and 28S ribosomal RNA gene, partial sequence	100	525	0	525	0	0	0	AATCTAAAGTTGACTAATAGAATTAGAAGCTTCTACTTTACAAAACTCGGCCACTCCCGAAAGAGCGTCCTCAGCGAATAGTCTATTACACTGAGTCAATCCGATTTTCGAATATGAGATGCTAATCATTTACGAACGAGCTTCGCCAATAAAGGCCAGCAAGCGTTCAAAATCCAAACACTAATCCGATTTACTAGAAATCGGTAGGTTGAAGAGTTCATGACACTCAAACAGACATGCTCTCCGGAATACCAGAGAGCGCAAGGTGCGTTCAAAGATTCGATGATTCACTGAATTCTGCAATTCACATTACTTATCACATTTCGCTGCGTTCTTCATCGATGCGAGAGCCAAGAGATCCGTTGTTGAAAGTTTTTTTTGTTTTGTTTTTATATACAT…	AATCTAAAGTTGACTAATAGAATTAGAAGCTTCTACTTTACAAAACTCGGCCACTCCCGAAAGAGCGTCCTCAGCGAATAGTCTATTACACTGAGTCAATCCGATTTTCGAATATGAGATGCTAATCATTTACGAACGAGCTTCGCCAATAAAGGCCAGCAAGCGTTCAAAATCCAAACACTAATCCGATTTACTAGAAATCGGTAGGTTGAAGAGTTCATGACACTCAAACAGACATGCTCTCCGGAATACCAGAGAGCGCAAGGTGCGTTCAAAGATTCGATGATTCACTGAATTCTGCAATTCACATTACTTATCACATTTCGCTGCGTTCTTCATCGATGCGAGAGCCAAGAGATCCGTTGTTGAAAGTTTTTTTTGTTTTGTTTTTATATACAT…	Basidiomycota	Microbotryomycetes	Curvibasidium	Curvibasidium
147	B198	MT988295	NR_111077.1	TCTAAAGTTGACTAATAGAATTAGAAGCTTCTACTTTACAAAACTCGGCCACTCCCGAAAGAGCGTCCTCAGCGAATAGTCTATTACACTGAGTCAATCCGATTTTCGAATATGAGATGCTAATCATTTACGAACGAGCTTCGCCAATAAAGGCCAGCAAGCGTTCAAAATCCAAACACTAATCCGATTTACTAGAAATCGGTAGGTTGAAGAGTTCATGACACTCAAACAGACATGCTCTCCGGAATACCAGAGAGCGCAAGGTGCGTTCAAAGATTCGATGATTCACTGAATTCTGCAATTCACATTACTTATCACATTTCGCTGCGTTCTTCATCGATGCGAGAGCCAAGAGATCCGTTGTTGAAAGTTTTTTTTGTTTTGTTTTTATATACATAC…	Curvibasidium aff. cygneicollum		NR_111077.1 Curvibasidium cygneicollum CBS 4551 ITS region; from synonym TYPE material >AF444490.1 Curvibasidium cygneicollum strain CBS 4551 18S ribosomal RNA gene, partial sequence; internal transcribed spacer 1, 5.8S ribosomal RNA gene, and internal transcribed spacer 2, complete sequence; and 28S ribosomal RNA gene, partial sequence	100	402	0	402	0	0	0	TCTAAAGTTGACTAATAGAATTAGAAGCTTCTACTTTACAAAACTCGGCCACTCCCGAAAGAGCGTCCTCAGCGAATAGTCTATTACACTGAGTCAATCCGATTTTCGAATATGAGATGCTAATCATTTACGAACGAGCTTCGCCAATAAAGGCCAGCAAGCGTTCAAAATCCAAACACTAATCCGATTTACTAGAAATCGGTAGGTTGAAGAGTTCATGACACTCAAACAGACATGCTCTCCGGAATACCAGAGAGCGCAAGGTGCGTTCAAAGATTCGATGATTCACTGAATTCTGCAATTCACATTACTTATCACATTTCGCTGCGTTCTTCATCGATGCGAGAGCCAAGAGATCCGTTGTTGAAAGTTTTTTTTGTTTTGTTTTTATATACATAC…	TCTAAAGTTGACTAATAGAATTAGAAGCTTCTACTTTACAAAACTCGGCCACTCCCGAAAGAGCGTCCTCAGCGAATAGTCTATTACACTGAGTCAATCCGATTTTCGAATATGAGATGCTAATCATTTACGAACGAGCTTCGCCAATAAAGGCCAGCAAGCGTTCAAAATCCAAACACTAATCCGATTTACTAGAAATCGGTAGGTTGAAGAGTTCATGACACTCAAACAGACATGCTCTCCGGAATACCAGAGAGCGCAAGGTGCGTTCAAAGATTCGATGATTCACTGAATTCTGCAATTCACATTACTTATCACATTTCGCTGCGTTCTTCATCGATGCGAGAGCCAAGAGATCCGTTGTTGAAAGTTTTTTTTGTTTTGTTTTTATATACATAC…	Basidiomycota	Microbotryomycetes	Curvibasidium	Curvibasidium
148	B090	MT988296	AF444635.1	CCCGGCTCTAATCCGAAGATTAGAATTCCTCAGCGAATAGTCTATTACGCCAAGTCAATCCGAAGTTCGATTGCGGATGCTAATGCATTACGAACGAGCTARACCGTAAAGGCCAGCAGCGCTCAGAAACCAAACACCTCTTCAATCATTAARAAAGAGGAGGGTTGAAGTATTCATGACACTCAAACAGGCATGCTCCACGGAWTACCATGGAGCGCAAGGTGCGTTCAAAGATTCGATGATTCACTGAATTCTGCMMTTCACATTACTTATCGCATTTCGCTGCGTTCTTCATCGATGCRAGAGCCAAGAGATCCGTTGTTGAAAGTTTTATTTTGTTATAAAATTTAATACATTCATAKACTTTGTGTTTRTAAGTGAATAGGAGTTCGCCCTCTT…	Rhodotorula aff. dairenensis		AF444635.1 Rhodotorula mucilaginosa strain CBS 9070 18S ribosomal RNA gene, partial sequence; internal transcribed spacer 1, 5.8S ribosomal RNA gene, and internal transcribed spacer 2, complete sequence; and 28S ribosomal RNA gene, partial sequence >KJ706320.1 Rhodotorula mucilaginosa strain DBMY101 18S ribosomal RNA gene, partial sequence; internal transcribed spacer 1, 5.8S ribosomal RNA gene, …	98.444	514	0	506	8	0	0	CCCGGCTCTAATCCGAAGATTAGAATTCCTCAGCGAATAGTCTATTACGCCAAGTCAATCCGAAGTTCGATTGCGGATGCTAATGCATTACGAACGAGCTARACCGTAAAGGCCAGCAGCGCTCAGAAACCAAACACCTCTTCAATCATTAARAAAGAGGAGGGTTGAAGTATTCATGACACTCAAACAGGCATGCTCCACGGAWTACCATGGAGCGCAAGGTGCGTTCAAAGATTCGATGATTCACTGAATTCTGCMMTTCACATTACTTATCGCATTTCGCTGCGTTCTTCATCGATGCRAGAGCCAAGAGATCCGTTGTTGAAAGTTTTATTTTGTTATAAAATTTAATACATTCATAKACTTTGTGTTTRTAAGTGAATAGGAGTTCGCCCTCTT…	CCCGGCTCTAATCCGAAGATTAGAATTCCTCAGCGAATAGTCTATTACGCCAAGTCAATCCGAAGTTCGATTGCGGATGCTAATGCATTACGAACGAGCTAGACCGTAAAGGCCAGCAGCGCTCAGAAACCAAACACCTCTTCAATCATTAAGAAAGAGGAGGGTTGAAGTATTCATGACACTCAAACAGGCATGCTCCACGGAATACCATGGAGCGCAAGGTGCGTTCAAAGATTCGATGATTCACTGAATTCTGCAATTCACATTACTTATCGCATTTCGCTGCGTTCTTCATCGATGCGAGAGCCAAGAGATCCGTTGTTGAAAGTTTTATTTTGTTATAAAATTTAATACATTCATAGACTTTGTGTTTATAAGTGAATAGGAGTTCGCCCTCTT…	Basidiomycota	Sporidiobolales	Sporidiobolaceae	Rhodotorula
149	B091	MT988297	MH185954.1	TTGAGATCTAATCTTAAATGTAGACATTCTGATTAGAAGCTTCCTTTAACCTAACCCGGSTCTAATCCGAAGATTAGAATTCCTCAGCGAATAGTCTATTACGCCAAGTCAATCCGAAGTTCGATTGCGGATGCTAATGCATTACGAACGAGCTAGACCGTAAGGYCAGCAGCGCTCAGAATCCAAACACCTCTTCAATCATTAAGAAAGAGGAGGGTTGAAGTATTCATGACACTCAAACAGGCATGCTCCACGGAATACCATGGAGCGCAAGGKGCGTTCAAAGATTCGATGATTCACTGAATTCTGCAATTCACATTACTTATCGCATTTCGCTGCGTTCTTCATCGATGCGAGAGCCAAGAGATCCGTTGTTGAAAGTTTTATTTTGTTATAAAA…	Rhodotorula aff. dairenensis		MH185954.1 Rhodotorula dairenensis strain SZWA1 small subunit ribosomal RNA gene, partial sequence; internal transcribed spacer 1 and 5.8S ribosomal RNA gene, complete sequence; and internal transcribed spacer 2, partial sequence	99.471	567	0	564	3	0	0	TTGAGATCTAATCTTAAATGTAGACATTCTGATTAGAAGCTTCCTTTAACCTAACCCGGSTCTAATCCGAAGATTAGAATTCCTCAGCGAATAGTCTATTACGCCAAGTCAATCCGAAGTTCGATTGCGGATGCTAATGCATTACGAACGAGCTAGACCGTAAGGYCAGCAGCGCTCAGAATCCAAACACCTCTTCAATCATTAAGAAAGAGGAGGGTTGAAGTATTCATGACACTCAAACAGGCATGCTCCACGGAATACCATGGAGCGCAAGGKGCGTTCAAAGATTCGATGATTCACTGAATTCTGCAATTCACATTACTTATCGCATTTCGCTGCGTTCTTCATCGATGCGAGAGCCAAGAGATCCGTTGTTGAAAGTTTTATTTTGTTATAAAA…	TTGAGATCTAATCTTAAATGTAGACATTCTGATTAGAAGCTTCCTTTAACCTAACCCGGCTCTAATCCGAAGATTAGAATTCCTCAGCGAATAGTCTATTACGCCAAGTCAATCCGAAGTTCGATTGCGGATGCTAATGCATTACGAACGAGCTAGACCGTAAGGCCAGCAGCGCTCAGAATCCAAACACCTCTTCAATCATTAAGAAAGAGGAGGGTTGAAGTATTCATGACACTCAAACAGGCATGCTCCACGGAATACCATGGAGCGCAAGGTGCGTTCAAAGATTCGATGATTCACTGAATTCTGCAATTCACATTACTTATCGCATTTCGCTGCGTTCTTCATCGATGCGAGAGCCAAGAGATCCGTTGTTGAAAGTTTTATTTTGTTATAAAA…	Basidiomycota	Sporidiobolales	Sporidiobolaceae	Rhodotorula
150	B096	MT988298	MK268126.1	CTAATCTTAAAATGTAGACATTCTGATTAGAAGCTTCCTTTAACCTAACCCGGCTCTAATCCGAAGATTAGAATTCCTCAGCGAATAGTCTATTACGCCAAGTCAATCCGAAGTTCGATTGCGGATGCTAATGCATTACGAACGAGCTAGACCGTAAGGCCAGCAGCGCTCAGAATCCAAACACCTCTTCAATCATTAAGAAAGAGGAGGGTTGAAGTATTCATGACACTCAAACAGGCATGCTCCACGGAATACCATGGAGCGCAAGGTGCGTTCAAAGATTCGATGATTCACTGAATTCTGCAATTCACATTACTTATCGCATTTCGCTGCGTTCTTCATCGATGCGAGAGCCAAGAGATCCGTTGTTGAAAGTTTTATTTTGTTATAAAATTAAAT…	Rhodotorula aff. dairenensis		MK268126.1 Rhodotorula dairenensis isolate R97193_ITS small subunit ribosomal RNA gene, partial sequence; internal transcribed spacer 1, 5.8S ribosomal RNA gene, and internal transcribed spacer 2, complete sequence; and large subunit ribosomal RNA gene, partial sequence	100	560	0	560	0	0	0	CTAATCTTAAAATGTAGACATTCTGATTAGAAGCTTCCTTTAACCTAACCCGGCTCTAATCCGAAGATTAGAATTCCTCAGCGAATAGTCTATTACGCCAAGTCAATCCGAAGTTCGATTGCGGATGCTAATGCATTACGAACGAGCTAGACCGTAAGGCCAGCAGCGCTCAGAATCCAAACACCTCTTCAATCATTAAGAAAGAGGAGGGTTGAAGTATTCATGACACTCAAACAGGCATGCTCCACGGAATACCATGGAGCGCAAGGTGCGTTCAAAGATTCGATGATTCACTGAATTCTGCAATTCACATTACTTATCGCATTTCGCTGCGTTCTTCATCGATGCGAGAGCCAAGAGATCCGTTGTTGAAAGTTTTATTTTGTTATAAAATTAAAT…	CTAATCTTAAAATGTAGACATTCTGATTAGAAGCTTCCTTTAACCTAACCCGGCTCTAATCCGAAGATTAGAATTCCTCAGCGAATAGTCTATTACGCCAAGTCAATCCGAAGTTCGATTGCGGATGCTAATGCATTACGAACGAGCTAGACCGTAAGGCCAGCAGCGCTCAGAATCCAAACACCTCTTCAATCATTAAGAAAGAGGAGGGTTGAAGTATTCATGACACTCAAACAGGCATGCTCCACGGAATACCATGGAGCGCAAGGTGCGTTCAAAGATTCGATGATTCACTGAATTCTGCAATTCACATTACTTATCGCATTTCGCTGCGTTCTTCATCGATGCGAGAGCCAAGAGATCCGTTGTTGAAAGTTTTATTTTGTTATAAAATTAAAT…	Basidiomycota	Sporidiobolales	Sporidiobolaceae	Rhodotorula
151	B114	MT988299	MH185954.1	TTGAGATCTAATCTTAAATGTAGACATTCTGATTAGAAGCTTCCTTTAACCTAMCCCGGCTCTAATCCGAAGATTAGAATTCCTCAGCGAATAGTCTATTACGCCAAGTCAATCCGAAGTTCGATTGCGGATGCTAATGCATTACGAACGAGCTAGACCGTAAGGCCAGCAGCGCTCAGAATCCAAACACCTCTTCAATCATTAAGAAAGAGGAGGGTTGAAGTATTCATGACACTCAAACAGGCATGCTCCACGGAATACCATGGAGCGCAAGGTGCGTTCAAAGATTCGATGATTCACTGAATTCTGCAATTCACATTACTTATCGCATTTCGCTGCGTTCTTCATCGATGCGAGAGCCAAGAGATCCGTTGTTGAAAGTTTTATTTTGTTATAAAA…	Rhodotorula aff. dairenensis		MH185954.1 Rhodotorula dairenensis strain SZWA1 small subunit ribosomal RNA gene, partial sequence; internal transcribed spacer 1 and 5.8S ribosomal RNA gene, complete sequence; and internal transcribed spacer 2, partial sequence	99.648	568	0	566	1	1	1	TTGAGATCTAATCTTAAATGTAGACATTCTGATTAGAAGCTTCCTTTAACCTAMCCCGGCTCTAATCCGAAGATTAGAATTCCTCAGCGAATAGTCTATTACGCCAAGTCAATCCGAAGTTCGATTGCGGATGCTAATGCATTACGAACGAGCTAGACCGTAAGGCCAGCAGCGCTCAGAATCCAAACACCTCTTCAATCATTAAGAAAGAGGAGGGTTGAAGTATTCATGACACTCAAACAGGCATGCTCCACGGAATACCATGGAGCGCAAGGTGCGTTCAAAGATTCGATGATTCACTGAATTCTGCAATTCACATTACTTATCGCATTTCGCTGCGTTCTTCATCGATGCGAGAGCCAAGAGATCCGTTGTTGAAAGTTTTATTTTGTTATAAAA…	TTGAGATCTAATCTTAAATGTAGACATTCTGATTAGAAGCTTCCTTTAACCTAACCCGGCTCTAATCCGAAGATTAGAATTCCTCAGCGAATAGTCTATTACGCCAAGTCAATCCGAAGTTCGATTGCGGATGCTAATGCATTACGAACGAGCTAGACCGTAAGGCCAGCAGCGCTCAGAATCCAAACACCTCTTCAATCATTAAGAAAGAGGAGGGTTGAAGTATTCATGACACTCAAACAGGCATGCTCCACGGAATACCATGGAGCGCAAGGTGCGTTCAAAGATTCGATGATTCACTGAATTCTGCAATTCACATTACTTATCGCATTTCGCTGCGTTCTTCATCGATGCGAGAGCCAAGAGATCCGTTGTTGAAAGTTTTATTTTGTTATAAAA…	Basidiomycota	Sporidiobolales	Sporidiobolaceae	Rhodotorula
152	B119	MT988300	MH185954.1	CGGCTCTAATCCGAAGATTAGAATTCCTCAGCGAATAGTCTATTACGCCAAGTCAATCCGAAGTTCGATTGCGGATGCTAATGCATTACGAACGAGCTAGACCGTAAGGCCAGCAGCGCTCAGAATCCAAACACCTCTTCAATCATTAAGAAAGAGGAGGGTTGAAGTATTCATGACACTCAAACAGGCATGCTCCACGGAATACCATGGAGCGCAAGGTGCGTTCAAAGATTCGATGATTCACTGAATTCTGCAATTCACATTACTTATCGCATTTCGCTGCGTTCTTCATCGATGCGAGAGCCAAGAGATCCGTTGTTGAAAGTTTTATTTTGTTATAAAATTAAATACATTCATAGACTTTGTGTTTATAAGTGAATAGGAGTTCGCTCTCTTGCG…	Rhodotorula aff. dairenensis		MH185954.1 Rhodotorula dairenensis strain SZWA1 small subunit ribosomal RNA gene, partial sequence; internal transcribed spacer 1 and 5.8S ribosomal RNA gene, complete sequence; and internal transcribed spacer 2, partial sequence	100	511	0	511	0	0	0	CGGCTCTAATCCGAAGATTAGAATTCCTCAGCGAATAGTCTATTACGCCAAGTCAATCCGAAGTTCGATTGCGGATGCTAATGCATTACGAACGAGCTAGACCGTAAGGCCAGCAGCGCTCAGAATCCAAACACCTCTTCAATCATTAAGAAAGAGGAGGGTTGAAGTATTCATGACACTCAAACAGGCATGCTCCACGGAATACCATGGAGCGCAAGGTGCGTTCAAAGATTCGATGATTCACTGAATTCTGCAATTCACATTACTTATCGCATTTCGCTGCGTTCTTCATCGATGCGAGAGCCAAGAGATCCGTTGTTGAAAGTTTTATTTTGTTATAAAATTAAATACATTCATAGACTTTGTGTTTATAAGTGAATAGGAGTTCGCTCTCTTGCG…	CGGCTCTAATCCGAAGATTAGAATTCCTCAGCGAATAGTCTATTACGCCAAGTCAATCCGAAGTTCGATTGCGGATGCTAATGCATTACGAACGAGCTAGACCGTAAGGCCAGCAGCGCTCAGAATCCAAACACCTCTTCAATCATTAAGAAAGAGGAGGGTTGAAGTATTCATGACACTCAAACAGGCATGCTCCACGGAATACCATGGAGCGCAAGGTGCGTTCAAAGATTCGATGATTCACTGAATTCTGCAATTCACATTACTTATCGCATTTCGCTGCGTTCTTCATCGATGCGAGAGCCAAGAGATCCGTTGTTGAAAGTTTTATTTTGTTATAAAATTAAATACATTCATAGACTTTGTGTTTATAAGTGAATAGGAGTTCGCTCTCTTGCG…	Basidiomycota	Sporidiobolales	Sporidiobolaceae	Rhodotorula
153	B129	MT988301	MH185954.1	GCGTTCAAAGATTCGATGATTCACTGAATTCTGCAATTCACATTACTTATCGSATTTCGCTGCGTTCTTCATCGATGCGAGAGCCAAGAGATCCGTTGTTGAAAGTTTTATTTTGTTATAAAATTAAATACATTCMTAGACTWKGTGTTTATAAGTGAATAGGAGTTCGCTCTCTTGCGAGAGTTACTATCCCAAACAAATGCACAGGGTTAGAAAGTGAGAGTTCGGACTCCAAGTTAAGTTGGACGTCCTATGTTCACTAATGATCCTTCCGCAGGTTCACCTACGGAA	Rhodotorula aff. dairenensis		MH185954.1 Rhodotorula dairenensis strain SZWA1 small subunit ribosomal RNA gene, partial sequence; internal transcribed spacer 1 and 5.8S ribosomal RNA gene, complete sequence; and internal transcribed spacer 2, partial sequence	98.625	291	2.69e-147	287	4	0	0	GCGTTCAAAGATTCGATGATTCACTGAATTCTGCAATTCACATTACTTATCGSATTTCGCTGCGTTCTTCATCGATGCGAGAGCCAAGAGATCCGTTGTTGAAAGTTTTATTTTGTTATAAAATTAAATACATTCMTAGACTWKGTGTTTATAAGTGAATAGGAGTTCGCTCTCTTGCGAGAGTTACTATCCCAAACAAATGCACAGGGTTAGAAAGTGAGAGTTCGGACTCCAAGTTAAGTTGGACGTCCTATGTTCACTAATGATCCTTCCGCAGGTTCACCTACGGAA	GCGTTCAAAGATTCGATGATTCACTGAATTCTGCAATTCACATTACTTATCGCATTTCGCTGCGTTCTTCATCGATGCGAGAGCCAAGAGATCCGTTGTTGAAAGTTTTATTTTGTTATAAAATTAAATACATTCATAGACTTTGTGTTTATAAGTGAATAGGAGTTCGCTCTCTTGCGAGAGTTACTATCCCAAACAAATGCACAGGGTTAGAAAGTGAGAGTTCGGACTCCAAGTTAAGTTGGACGTCCTATGTTCACTAATGATCCTTCCGCAGGTTCACCTACGGAA	Basidiomycota	Sporidiobolales	Sporidiobolaceae	Rhodotorula
154	G2_079_01	MT988302	MK079247.1	CCTGATTTGAGATCTAATCTTAAAATGTAGACATTCTGATTAGAAGCTTCCTTTAACCCAACCCGGCTCTAGTCCGAAGACTAGAATTCCTCAGCGAATAGTCTATTACGCCAAGTCAATCCGAAGTTCGATTGCGGATGCTAATGCATTACGAACGAGCTAGACCGTAAAGGCCAGCAGCGCTCAGAAACCAAACACCTCTTCAATCATTAAGAAAGAGGAGGGTTGAAGTATTCATGACACTCAAACAGGCATGCTCCACGGAATACCATGGAGCGCAAGGTGCGTTCAAAGATTCGATGATTCACTGAATTCTGCAATTCACATTACTTATCGCATTTCGCTGCGTTCTTCATCGATGCGAGAGCCAAGAGATCCGTTGTTGAAAGTTTTATTTTG…	Rhodotorula aff. mucilaginosa		MK079247.1 Rhodotorula mucilaginosa strain S2 internal transcribed spacer 1, partial sequence; 5.8S ribosomal RNA gene, complete sequence; and internal transcribed spacer 2, partial sequence	100	557	0	557	0	0	0	CCTGATTTGAGATCTAATCTTAAAATGTAGACATTCTGATTAGAAGCTTCCTTTAACCCAACCCGGCTCTAGTCCGAAGACTAGAATTCCTCAGCGAATAGTCTATTACGCCAAGTCAATCCGAAGTTCGATTGCGGATGCTAATGCATTACGAACGAGCTAGACCGTAAAGGCCAGCAGCGCTCAGAAACCAAACACCTCTTCAATCATTAAGAAAGAGGAGGGTTGAAGTATTCATGACACTCAAACAGGCATGCTCCACGGAATACCATGGAGCGCAAGGTGCGTTCAAAGATTCGATGATTCACTGAATTCTGCAATTCACATTACTTATCGCATTTCGCTGCGTTCTTCATCGATGCGAGAGCCAAGAGATCCGTTGTTGAAAGTTTTATTTTG…	CCTGATTTGAGATCTAATCTTAAAATGTAGACATTCTGATTAGAAGCTTCCTTTAACCCAACCCGGCTCTAGTCCGAAGACTAGAATTCCTCAGCGAATAGTCTATTACGCCAAGTCAATCCGAAGTTCGATTGCGGATGCTAATGCATTACGAACGAGCTAGACCGTAAAGGCCAGCAGCGCTCAGAAACCAAACACCTCTTCAATCATTAAGAAAGAGGAGGGTTGAAGTATTCATGACACTCAAACAGGCATGCTCCACGGAATACCATGGAGCGCAAGGTGCGTTCAAAGATTCGATGATTCACTGAATTCTGCAATTCACATTACTTATCGCATTTCGCTGCGTTCTTCATCGATGCGAGAGCCAAGAGATCCGTTGTTGAAAGTTTTATTTTG…	Basidiomycota	Sporidiobolales	Sporidiobolaceae	Rhodotorula
155	B065	MT988303	JN003620.1	GAGATCTAATCAAAAAATAGACTTTAGGATTAGGAGCTTCCTTTAACCCAACTCGGCTCTAGTAAACTAGAATCCTCAGCGAATAGTCTATTACGCCAAGTCAATCCGAAGTTCGGTTGCGGATGCTAATGCATTACGAACGAGCTAAGCCGAAGCAGAGCAGCGCTCAGAAACCAAGCACCACCAGATTCACTAAGAAAGAGGTGGGTTGAAGATTTCATGACACTCAAACAGGCATGCTCCTCGGAATACCAAGGAGCGCAAGGTGCGTTCAAAGATTCGATGATTCACTGAATTCTGCAATTCACATTACGTATCGCATTTCGCTGCGTTCTTCATCGATGCGAGAGCCAAGAGATCCGTTGTTGAAAGTTTTGTTTTGTTATAAATTTGTATACA…	Rhodotorula sp.	multiple 100% identity matches to several Rhodutorula species	JN003620.1 Rhodosporidium babjevae isolate BD19 18S ribosomal RNA gene, partial sequence; internal transcribed spacer 1, 5.8S ribosomal RNA gene, and internal transcribed spacer 2, complete sequence; and 28S ribosomal RNA gene, partial sequence	100	560	0	560	0	0	0	GAGATCTAATCAAAAAATAGACTTTAGGATTAGGAGCTTCCTTTAACCCAACTCGGCTCTAGTAAACTAGAATCCTCAGCGAATAGTCTATTACGCCAAGTCAATCCGAAGTTCGGTTGCGGATGCTAATGCATTACGAACGAGCTAAGCCGAAGCAGAGCAGCGCTCAGAAACCAAGCACCACCAGATTCACTAAGAAAGAGGTGGGTTGAAGATTTCATGACACTCAAACAGGCATGCTCCTCGGAATACCAAGGAGCGCAAGGTGCGTTCAAAGATTCGATGATTCACTGAATTCTGCAATTCACATTACGTATCGCATTTCGCTGCGTTCTTCATCGATGCGAGAGCCAAGAGATCCGTTGTTGAAAGTTTTGTTTTGTTATAAATTTGTATACA…	GAGATCTAATCAAAAAATAGACTTTAGGATTAGGAGCTTCCTTTAACCCAACTCGGCTCTAGTAAACTAGAATCCTCAGCGAATAGTCTATTACGCCAAGTCAATCCGAAGTTCGGTTGCGGATGCTAATGCATTACGAACGAGCTAAGCCGAAGCAGAGCAGCGCTCAGAAACCAAGCACCACCAGATTCACTAAGAAAGAGGTGGGTTGAAGATTTCATGACACTCAAACAGGCATGCTCCTCGGAATACCAAGGAGCGCAAGGTGCGTTCAAAGATTCGATGATTCACTGAATTCTGCAATTCACATTACGTATCGCATTTCGCTGCGTTCTTCATCGATGCGAGAGCCAAGAGATCCGTTGTTGAAAGTTTTGTTTTGTTATAAATTTGTATACA…	Basidiomycota	Sporidiobolales	Sporidiobolaceae	Rhodotorula
156	G2_037_02	MT988304	MF615041.1	TGATTTGAGGTCTAAATTCAAGAAATTTGACTACAAATTGAGATTAGAAGCTTCTAACTGTCATCTACAGTTCGGCCACCACACGAGGTAGTGTCCTCAGCGAATAGTCTATTACGCTGAGTCAATCCGAAGTTCGAAATTGAGAAGGCTAATGCATTACGAACGAGCAGTGCCCCGAGGGGCTCTGCAAAGCGTTCAAGATCCAAACACCAGCACCGATCAACAAGGAAAGGGTGGGTTGAAGAGTTCATGACACTCAAACAGGCATGCTCTCCGGAATACCAGAGAGCGCAAGGTGCGTTCAAAGATTCGATGATTCACTGAATTCTGCAATTCACATTACTTATCACATTTCGCTGCGTTCTTCATCGATGCGAGAGCCAAGAGATCCGTTGTTGA…	Sporobolomyces sp.	lowQ Seq	MF615041.1 Sporobolomyces sp. (in: Microbotryomycetes) strain W38 internal transcribed spacer 1, partial sequence; 5.8S ribosomal RNA gene and internal transcribed spacer 2, complete sequence; and large subunit ribosomal RNA gene, partial sequence	94.558	441	0	417	17	6	7	TGATTTGAGGTCTAAATTCAAGAAATTTGACTACAAAT-TGAGATTAGAAGCTTCTAACTGTCATCTACAGTTCGGCCACCACACGAGGTAGTGTCCTCAGCGAATAGTCTATTACGCTGAGTCAATCCGAAGTTCGAAATTGAGAAGGCTAATGCATTACGAACGAGCAGTGC-CCCGAGGGGCTCTGCAAAGCGTTCAAGATCCAAACACCAGCACCGATCAACAAGGAAAGGGTGGGTTGAAGAGTTCATGACACTCAAACAGGCATGCTCTCCGGAATACCAGAGAGCGCAAGGTGCGTTCAAAGATTCGATGATTCACTGAATTCTGCAATTCACATTACTTATCACATTTCGCTGCGTTCTTCATCGATGCGAGAGCCAAGAGATCCGTTGTT…	TGATTTGAGGTCTAAATTCAAAAAATTTGACTACAAATATGAGATTAGAAGCTTCGTA--GTTATCTACAGTTCGGCCACCGC-CGAAGCAGTGTCCTCAGCGAATAGTCTATTACGCTGAGTCAATCCGAAGGTCGAAATTGAGAAGGCTAATGTATTACGAACGAGCAG-GCTGACAAGCAG-TCTGCAAAACGTTCAAGATCCAAACACCAACACCGATCAACAAGGAAAGGGTGGGTTGAAGAGTTCATGACACTCAAACAGGCATGCTCTCCGGAATACCAGAGAGCGCAAGGTGCGTTCAAAGATTCGATGATTCACTGAATTCTGCAATTCACATTACTTATCACATTTCGCTGCGTTCTTCATCGATGCGAGAGCCAAGAGATCCGTTGTT…	Basidiomycota	Sporidiobolales	Sporidiobolaceae	Sporobolomyces
157	B150	MT988305	KY105837.1	TCATGAATATGTGGGGTTATCAGCCACCCAGAAGGATGAAACGTATTACATCCAAGGTGCTTATGTCTTTAAGGCGAGCCTTTAGCAAGGCAGCACCCAATACACCACCGCTCAGGCAAAAACCCAAGTGGGGTGAGGTTTCATGACACTCAAACAGGCATGCCCTTCGGAATACCAAAGGGCGCAAGGTGCGTTCAAAGATTCGATGATTCACTGAATTCTGCAATTCACATTACTTATCGCATTTCGCTGCGTTCTTCATCGATGCGAGAGCCAAGAGATCCGTTGTTAAAAGTTTTGTTTTTGTTATGATTTTACATTCATTACTAACAGTTTGTGATGGCCGAAGCCACAGTTCACGGTGTGTATGGAAACCCTCCTCTTGCGAGGAGAGCAGAT…	Vishniacozyma aff. victoriae		KY105837.1 Vishniacozyma victoriae culture CBS:9000 small subunit ribosomal RNA gene, partial sequence; internal transcribed spacer 1, 5.8S ribosomal RNA gene, and internal transcribed spacer 2, complete sequence; and large subunit ribosomal RNA gene, partial sequence	99.575	471	0	469	2	0	0	TCATGAATATGTGGGGTTATCAGCCACCCAGAAGGATGAAACGTATTACATCCAAGGTGCTTATGTCTTTAAGGCGAGCCTTTAGCAAGGCAGCACCCAATACACCACCGCTCAGGCAAAAACCCAAGTGGGGTGAGGTTTCATGACACTCAAACAGGCATGCCCTTCGGAATACCAAAGGGCGCAAGGTGCGTTCAAAGATTCGATGATTCACTGAATTCTGCAATTCACATTACTTATCGCATTTCGCTGCGTTCTTCATCGATGCGAGAGCCAAGAGATCCGTTGTTAAAAGTTTTGTTTTTGTTATGATTTTACATTCATTACTAACAGTTTGTGATGGCCGAAGCCACAGTTCACGGTGTGTATGGAAACCCTCCTCTTGCGAGGAGAGCAGAT…	TCATGAATATGTGGGGTTATCAGCCACCCAGAAGGATGAAACGTATTACATCCAAGGTGCTTATGTCTTTAAGGCGAGCCTTTAGCAAGGCAACACCCAATACACCACCGCTCAGGCAAAAACCCAAGTGGGGTGAGGTTTCATGACACTCAAACAGGCATGCCCTTCGGAATACCAAAGGGCGCAAGGTGCGTTCAAAGATTCGATGATTCACTGAATTCTGCAATTCACATTACTTATCGCATTTCGCTGCGTTCTTCATCGATGCGAGAGCCAAGAGATCCGTTGTTAAAAGTTTTGTTTTTGTTATGATTTTACATTCATTACTAACAGTTTGTGATGGCCGAAGCCACAGTTCACGGTGTGTATGGAAACCCTCCTCTTGCGAGGAGAGCAGAT…	Basidiomycota	Tremellales	Bulleribasidiaceae	Vishniacozyma
158	G2_067_05	MT988306	KY104461.1	CTGATTTCAGGTCAAGTCAAAAGGTGCGCGATGGCAGGTTTTGAGCAGTCATCACCACAAGGAGAGACGAAACTTATTACGTCTAACACTGATGTGGGATGTTCCACTAAGTCATTTGAGGTGAGCCATTGCTGGCAGACACCCAAGTCCAAGCCTAACATGTTCAGAAAACATATTAGATTGAGATTTCATGACACTGAAACAGGCATGCCTTTCGGAATACCAAAAGGCGCAAGGTGCGTTCAAAGATTCGATGATTCACTGAATTCTGCAATTCACATTACTTATCGCATTTCGCTGCGTTCTTCATCGATGCGAGAGCCAAGAGATCCGTTGTTAAAAGTTTTGTTTAATTAAGATACTCTTACGTTCGTTACACTGATGTTTGATTATTAACCC…	Papiliotrema aff. flavescens		KY104461.1 Papiliotrema flavescens culture CBS:6473 small subunit ribosomal RNA gene, partial sequence; internal transcribed spacer 1, 5.8S ribosomal RNA gene, and internal transcribed spacer 2, complete sequence; and large subunit ribosomal RNA gene, partial sequence	99.364	472	0	469	3	0	0	CTGATTTCAGGTCAAGTCAAAAGGTGCGCGATGGCAGGTTTTGAGCAGTCATCACCACAAGGAGAGACGAAACTTATTACGTCTAACACTGATGTGGGATGTTCCACTAAGTCATTTGAGGTGAGCCATTGCTGGCAGACACCCAAGTCCAAGCCTAACATGTTCAGAAAACATATTAGATTGAGATTTCATGACACTGAAACAGGCATGCCTTTCGGAATACCAAAAGGCGCAAGGTGCGTTCAAAGATTCGATGATTCACTGAATTCTGCAATTCACATTACTTATCGCATTTCGCTGCGTTCTTCATCGATGCGAGAGCCAAGAGATCCGTTGTTAAAAGTTTTGTTTAATTAAGATACTCTTACGTTCGTTACACTGATGTTTGATTATTAACCC…	CTGATTTCAGGTCAAGTCAAAAGGTGCGCGATGGCAGGTTTTGAGCAGTCATCACCACAAGGAGAGACGAAACTTATTACGTCTAACACTGATGTGGGATGTTCCACTAAGTCATTTGAGGTGAGCCATTGCTGGCAGACACCCAAGTCCAAGCCTAACATGTTCAGAAAACATATTAGATTGAGATTTCATGACACTGAAACAGGCATGCCTTTCGGAATACCAAAAGGCGCAAGGTGCGTTCAAAGATTCGATGATTCACTGAATTCTGCAATTCACATTACTTATCGCATTTCGCTGCGTTCTTCATCGATGCGAGAGCCAAGAGATCCGTTGTTAAAAGTTTTGTTTAATTAAGATACTCTTACGTTCGTTACACTGATGTTTGATTATTAACCC…	Basidiomycota	Tremellales	Rhynchogastremataceae	Papiliotrema
159	G2_073_01	MT988307	MH931267.1	CCTCCTGATTTCAGGTCAAGTCAAAAGGTGCGCGATGGCAGGTTTTGAGCAGTCATCACCACAAGGAGAGACGAAACTTATTACGTCTAACACTGATGTGGGATGTTCCACTAAGTCATTTGAGGTGAGCCATTGCTGGCAGACACCCAAGTCCAAGCCTAACATGTTCAGAAAACATATTAGATTGAGATTTCATGACACTGAAACAGGCATGCCTTTCGGAATACCAAAAGGCGCAAGGTGCGTTCAAAGATTCGATGATTCACTGAATTCTGCAATTCACATTACTTATCGCATTTCGCTGCGTTCTTCATCGATGCGAGAGCCAAGAGATCCGTTGTTAAAAGTTTTGTTTAATTAAGATACTCTTACGTTCGTTACACTGATGTTTGATTATTA…	Papiliotrema aff. flavescens		MH931267.1 Papiliotrema flavescens isolate OH 111003.16 small subunit ribosomal RNA gene, partial sequence; internal transcribed spacer 1, 5.8S ribosomal RNA gene, and internal transcribed spacer 2, complete sequence; and large subunit ribosomal RNA gene, partial sequence	99.593	492	0	490	0	2	2	CCT-CCTGATTTCAGGTCAA-GTCAAAAGGTGCGCGATGGCAGGTTTTGAGCAGTCATCACCACAAGGAGAGACGAAACTTATTACGTCTAACACTGATGTGGGATGTTCCACTAAGTCATTTGAGGTGAGCCATTGCTGGCAGACACCCAAGTCCAAGCCTAACATGTTCAGAAAACATATTAGATTGAGATTTCATGACACTGAAACAGGCATGCCTTTCGGAATACCAAAAGGCGCAAGGTGCGTTCAAAGATTCGATGATTCACTGAATTCTGCAATTCACATTACTTATCGCATTTCGCTGCGTTCTTCATCGATGCGAGAGCCAAGAGATCCGTTGTTAAAAGTTTTGTTTAATTAAGATACTCTTACGTTCGTTACACTGATGTTTGATTAT…	CCTACCTGATTTCAGGTCAAAGTCAAAAGGTGCGCGATGGCAGGTTTTGAGCAGTCATCACCACAAGGAGAGACGAAACTTATTACGTCTAACACTGATGTGGGATGTTCCACTAAGTCATTTGAGGTGAGCCATTGCTGGCAGACACCCAAGTCCAAGCCTAACATGTTCAGAAAACATATTAGATTGAGATTTCATGACACTGAAACAGGCATGCCTTTCGGAATACCAAAAGGCGCAAGGTGCGTTCAAAGATTCGATGATTCACTGAATTCTGCAATTCACATTACTTATCGCATTTCGCTGCGTTCTTCATCGATGCGAGAGCCAAGAGATCCGTTGTTAAAAGTTTTGTTTAATTAAGATACTCTTACGTTCGTTACACTGATGTTTGATTAT…	Basidiomycota	Tremellales	Rhynchogastremataceae	Papiliotrema
160	G2_073_04	MT988308	MH931267.1	CTGATTTCAGGTCAAGTCAAAAGGTGCGCGATGGCAGGTTTTGAGCAGTCATCACCACAAGGAGAGACGAAACTTATTACGTCTAACACTGATGTGGGATGTTCCACTAAGTCATTTGAGGTGAGCCATTGCTGGCAGACACCCAAGTCCAAGCCTAACATGTTCAGAAAACATATTAGATTGAGATTTCATGACACTGAAACAGGCATGCCTTTCGGAATACCAAAAGGCGCAAGGTGCGTTCAAAGATTCGATGATTCACTGAATTCTGCAATTCACATTACTTATCGCATTTCGCTGCGTTCTTCATCGATGCGAGAGCCAAGAGATCCGTTGTTAAAAGTTTTGTTTAATTAAGATACTCTTACGTTCGTTACACTGATGTTTGATTATTAACCC…	Papiliotrema aff. flavescens		MH931267.1 Papiliotrema flavescens isolate OH 111003.16 small subunit ribosomal RNA gene, partial sequence; internal transcribed spacer 1, 5.8S ribosomal RNA gene, and internal transcribed spacer 2, complete sequence; and large subunit ribosomal RNA gene, partial sequence	99.179	487	0	483	3	1	1	CTGATTTCAGGTCAA-GTCAAAAGGTGCGCGATGGCAGGTTTTGAGCAGTCATCACCACAAGGAGAGACGAAACTTATTACGTCTAACACTGATGTGGGATGTTCCACTAAGTCATTTGAGGTGAGCCATTGCTGGCAGACACCCAAGTCCAAGCCTAACATGTTCAGAAAACATATTAGATTGAGATTTCATGACACTGAAACAGGCATGCCTTTCGGAATACCAAAAGGCGCAAGGTGCGTTCAAAGATTCGATGATTCACTGAATTCTGCAATTCACATTACTTATCGCATTTCGCTGCGTTCTTCATCGATGCGAGAGCCAAGAGATCCGTTGTTAAAAGTTTTGTTTAATTAAGATACTCTTACGTTCGTTACACTGATGTTTGATTATTAACC…	CTGATTTCAGGTCAAAGTCAAAAGGTGCGCGATGGCAGGTTTTGAGCAGTCATCACCACAAGGAGAGACGAAACTTATTACGTCTAACACTGATGTGGGATGTTCCACTAAGTCATTTGAGGTGAGCCATTGCTGGCAGACACCCAAGTCCAAGCCTAACATGTTCAGAAAACATATTAGATTGAGATTTCATGACACTGAAACAGGCATGCCTTTCGGAATACCAAAAGGCGCAAGGTGCGTTCAAAGATTCGATGATTCACTGAATTCTGCAATTCACATTACTTATCGCATTTCGCTGCGTTCTTCATCGATGCGAGAGCCAAGAGATCCGTTGTTAAAAGTTTTGTTTAATTAAGATACTCTTACGTTCGTTACACTGATGTTTGATTATTAACC…	Basidiomycota	Tremellales	Rhynchogastremataceae	Papiliotrema
161	B195	MT988309	NR_160324.1	AGACGAAACTTATTACGTCTAACACTGATGTGGGATGTTCCACTAAGTCATTTGAGGCGAGCCATTGCTGGCAAATCACCCAAGTCCAATCCAACCAGTCCAGAAGAACCAGAGGGATTGAGATTTCATGACACTCAAACAGGCATGCCTTTCGGAATACCAAAAGGCGCAAGGTGCGTTCAAAGATTCGATGATTCACTGAATTCTGCAATTCACATTACTTATCGCATTTCGCTGCGTTCTTCATCGATGCGAGAGCCAAGAGATCCGTTGTTGAAAGTTTTGTTTTTGTTATATATTTTACGTTCATTACACTGATGTTTGAATTAGACCCGGAGGTCAACAGTTCACAGAGGTGGTAGAATCTGATAAGGTCTTTCGACCAATCAATAATGATCC…	Papiliotrema aff. wisconsinensis		NR_160324.1 Papiliotrema wisconsinensis CBS 13895 ITS region; from TYPE material	99.523	419	0	417	1	1	1	AGACGAAACTTATTACGTCTAACACTGATGTGGGATGTTCCACTAAGTCATTTGAGGCGAGCCATTGCTGGCAAATCACCCAAGTCCAATCCAACCAGTCCAGAAGAACCAGAGGGATTGAGATTTCATGACACTCAAACAGGCATGCCTTTCGGAATACCAAAAGGCGCAAGGTGCGTTCAAAGATTCGATGATTCACTGAATTCTGCAATTCACATTACTTATCGCATTTCGCTGCGTTCTTCATCGATGCGAGAGCCAAGAGATCCGTTGTTGAAAGTTTTGTTTTTGTTATATATTTTACGTTCATTACACTGATGTTTGAATTAGACCCGGAGGTCAACAGTTCACAGAGGTGGTAGAATCTGATAAGGTCTTTCGACCAATCAATAATGATCC…	AGACGAAACTTATTACGTCTAACACTGATGTGGGATGTTCCACTAAGTCATTTGAGGCGAGCCATTGCTGGCAAATCACCCAAGTCCAATCCAACCAGTCCAGAAGAACCAGAGGGATTGAGATTTCATGACACTCAAACAGGCATGCCTTTCGGAATACCAAAAGGCGCAAGGTGCGTTCAAAGATTCGATGATTCACTGAATTCTGCAATTCACATTACTTATCGCATTTCGCTGCGTTCTTCATCGATGCGAGAGCCAAGAGATCCGTTGTTGAAAGTTTTGTTTTTGTTATATATTTTACGTTCATTACACTGATGTTTGAATTAGACCCGGAGGTCAACAGTTCACAGAGGTGGTAGAATCTGATAAGGTCTTTCGACCAATCAATAATGATCC…	Basidiomycota	Tremellales	Rhynchogastremataceae	Papiliotrema
162	B196	MT988310	NR_160324.1	GTGCGCGATGGCAGGTTCTGAGCAGTCATCACCACAAGGAGAGACGAAACTTATTACGTCTAACACTGATGTGGGATGTTCCACTAAGTCATTTGAGGCGAGCCATTGCTGGCAAATCACCCAAGTCCAATCCAACCAGTCCAGAAGAACCAGAGGGATTGAGATTTCATGACACTCAAACAGGCATGCCTTTCGGAATACCAAAAGGCGCAAGGTGCGTTCAAAGATTCGATGATTCACTGAATTCTGCAATTCACATTACTTATCGCATTTCGCTGCGTTCTTCATCGATGCGAGAGCCAAGAGATCCGTTGTTGAAAGTTTTGTTTTTGTTATATATTTTACGTTCATTACACTGATGTTTGAATTAGACCCGGAGGTCAACAGTTCACAGAGGTG…	Papiliotrema aff. wisconsinensis		NR_160324.1 Papiliotrema wisconsinensis CBS 13895 ITS region; from TYPE material	99.565	460	0	458	1	1	1	GTGCGCGATGGCAGGTTCTGAGCAGTCATCACCACAAGGAGAGACGAAACTTATTACGTCTAACACTGATGTGGGATGTTCCACTAAGTCATTTGAGGCGAGCCATTGCTGGCAAATCACCCAAGTCCAATCCAACCAGTCCAGAAGAACCAGAGGGATTGAGATTTCATGACACTCAAACAGGCATGCCTTTCGGAATACCAAAAGGCGCAAGGTGCGTTCAAAGATTCGATGATTCACTGAATTCTGCAATTCACATTACTTATCGCATTTCGCTGCGTTCTTCATCGATGCGAGAGCCAAGAGATCCGTTGTTGAAAGTTTTGTTTTTGTTATATATTTTACGTTCATTACACTGATGTTTGAATTAGACCCGGAGGTCAACAGTTCACAGAGGTG…	GTGCGCGATGGCAGGTTCTGAGCAGTCATCACCACAAGGAGAGACGAAACTTATTACGTCTAACACTGATGTGGGATGTTCCACTAAGTCATTTGAGGCGAGCCATTGCTGGCAAATCACCCAAGTCCAATCCAACCAGTCCAGAAGAACCAGAGGGATTGAGATTTCATGACACTCAAACAGGCATGCCTTTCGGAATACCAAAAGGCGCAAGGTGCGTTCAAAGATTCGATGATTCACTGAATTCTGCAATTCACATTACTTATCGCATTTCGCTGCGTTCTTCATCGATGCGAGAGCCAAGAGATCCGTTGTTGAAAGTTTTGTTTTTGTTATATATTTTACGTTCATTACACTGATGTTTGAATTAGACCCGGAGGTCAACAGTTCACAGAGGTG…	Basidiomycota	Tremellales	Rhynchogastremataceae	Papiliotrema
163	B156	MT988311	KY101795.1	GGTGCGCGATGGCAGGTTATGAGCAGGCTCAGAYCGACAAGGGACAAGACGAAACTTATTACGTCTGTCACGGATGTCAGTGAGATCCCACTAAGTCATTTGAGACGAGCCATTTGACTGGCAGACGTCCATGTCCAAGTCCAGCACCGGGTAATAAAACCCGATGGGATTGAGATTTCATGACACTCAAACAGGCATGCCTTTCGGAATACCAAAAGGCGCAAGGTGCGTTCAAAGATTCGATGATTCACTGAATTCTGCAATTCACATTACTTATCGCATTTCGCTGCGTTCTTCATCGATGCGAGAGCCAAGAGATCCGTTGTTGAAAGTTTTGTTTTTGTTAAGATAACAAGACGTTCGTTACACTGATGTTTGTAATAGTAGACCCGGAGGTCA…	Papiliotrema sp.	lowQ Seq	KY101795.1 Papiliotrema pseudoalba culture CBS:7343 small subunit ribosomal RNA gene, partial sequence; internal transcribed spacer 1, 5.8S ribosomal RNA gene, and internal transcribed spacer 2, complete sequence; and large subunit ribosomal RNA gene, partial sequence	96.124	516	0	496	16	4	4	GGTGCGCGATGGCAGGTTATGAGCAGGCTCAGAYCGACAAGGGACAAGACGAAACTTATTACGTCTGTCACGGATGTC-AGTGAGATCCCACTAAGTCATTTGAGACGAGCCATTTGACTGGCAGACGTCCATGTCCAAGTCCAGCACCGGGTAATAAAACCCGATGGGATTGAGATTTCATGACACTCAAACAGGCATGCCTTTCGGAATACCAAAAGGCGCAAGGTGCGTTCAAAGATTCGATGATTCACTGAATTCTGCAATTCACATTACTTATCGCATTTCGCTGCGTTCTTCATCGATGCGAGAGCCAAGAGATCCGTTGTTGAAAGTTTTGTTTTTGTTAAGATAACAAGACGTTCGTTACACTGATGTTTGTAATAGTAGACCCGGAGGTC…	GGTGCGCGATGGCAGGTTATGAGCAGGCTCGGTCAGACAAGGGACGAGACGAAACTTATTACGTCTGTCGCGGATGTCTAG-GAGATCCCACTAAGTCATTTGAGGCGAGCCACTTGCGTGGCAGACGCCCAGGTCCAAGTCCAGCACCGGATAGTAAAACCCGGTGGGATTGAGATTTCATGACACTCAAACAGGCATGCCTTTCGGAATACCAAAAGGCGCAAGGTGCGTTCAAAGATTCGATGATTCACTGAATTCTGCAATTCACATTACTTATCGCATTTCGCTGCGTTCTTCATCGATGCGAGAGCCAAGAGATCCGTTGTTGAAAGTTTTGTTTTTGTTAAGATAACAAGACGTTCGTTACACTGATGTTTGTAATTG-AGACCCGGAGGTC…	Basidiomycota	Tremellales	Rhynchogastremataceae	Papiliotrema
164	B190	MT988312	KY102915.1	GAAACTTATTACGCCGACTACGGTGCTATCCCGCTAAGTCTTTTAAGGCGAGCCGGCAGAGCGGCAACACCCAAGTCCAATCTCCTCGGAAACCCGAGGGATTGAGTCTACATGACACTCAAACAGGCATGCCCTCCGGAATACCAGAGGGCGCAAGGTGCGTTCAAAGATTCGATGATTCACTGAATTCTGCAATTCACATTACTTATCGCATTTCGCTGCGTTCTTCATCGATGCGAGAGCCAAGAGATCCGTTGTTGAAAGTTTTGTTTTGTTATGATATATGACGTTCATTACACCATGTTTGTAAAATAGCCCCGAAGGGCACGGTTCACAGAGGTTTGGAATAGTTATAAGCCCGTGAGGGCGTTCACTAATGATCCTTCCGCAGGTTCACCT…	Saitozyma sp.		KY102915.1 Saitozyma podzolica culture CBS:9491 small subunit ribosomal RNA gene, partial sequence; internal transcribed spacer 1, 5.8S ribosomal RNA gene, and internal transcribed spacer 2, complete sequence; and large subunit ribosomal RNA gene, partial sequence	100	442	0	442	0	0	0	GAAACTTATTACGCCGACTACGGTGCTATCCCGCTAAGTCTTTTAAGGCGAGCCGGCAGAGCGGCAACACCCAAGTCCAATCTCCTCGGAAACCCGAGGGATTGAGTCTACATGACACTCAAACAGGCATGCCCTCCGGAATACCAGAGGGCGCAAGGTGCGTTCAAAGATTCGATGATTCACTGAATTCTGCAATTCACATTACTTATCGCATTTCGCTGCGTTCTTCATCGATGCGAGAGCCAAGAGATCCGTTGTTGAAAGTTTTGTTTTGTTATGATATATGACGTTCATTACACCATGTTTGTAAAATAGCCCCGAAGGGCACGGTTCACAGAGGTTTGGAATAGTTATAAGCCCGTGAGGGCGTTCACTAATGATCCTTCCGCAGGTTCACCT…	GAAACTTATTACGCCGACTACGGTGCTATCCCGCTAAGTCTTTTAAGGCGAGCCGGCAGAGCGGCAACACCCAAGTCCAATCTCCTCGGAAACCCGAGGGATTGAGTCTACATGACACTCAAACAGGCATGCCCTCCGGAATACCAGAGGGCGCAAGGTGCGTTCAAAGATTCGATGATTCACTGAATTCTGCAATTCACATTACTTATCGCATTTCGCTGCGTTCTTCATCGATGCGAGAGCCAAGAGATCCGTTGTTGAAAGTTTTGTTTTGTTATGATATATGACGTTCATTACACCATGTTTGTAAAATAGCCCCGAAGGGCACGGTTCACAGAGGTTTGGAATAGTTATAAGCCCGTGAGGGCGTTCACTAATGATCCTTCCGCAGGTTCACCT…	Basidiomycota	Tremellales	Trimorphomycetaceae	Saitozyma
165	B177	MT988245		ACGTCCTCAGCGAAATAATTATCACGCCGAGTCAAACCGTTTATTTCAAATGGGTAGCTCGTGTATTTCAATTGAGTCGACTTGCGCCGGCAACAATCATAATCCAAGCCCACGCTTATCTCATTACAAAATAAGGGGGTTGAGAGTTTCATGACACTCAAACAGACATACTCTTCGGAATACCAAAGAGTGCAAGGTGCGTTCAAAGATTCGATGATTCACTGAATTCTGCAATTCACATTACTTATCGCAATTCGCTGCGTTCTTCATCGATGTGAGAGCCAAGAGATCCGTTGCTGAAAGTTTTGTTTTTATTTATGCTCAATTAAGAGACTGTTACATTCTTATACTAATGTGTTAAAATGTGTGTAAAAAGAAGTGTGTGCACAGTGTAAGGAA…	Cystobasidium sp.	JN572895.1; JN572895.1; MN006705.1; Rhodosporidiobolus oreadorum; Cystobasidium psychroaquaticum			449	0	449	0	0	0	ACGTCCTCAGCGAAATAATTATCACGCCGAGTCAAACCGTTTATTTCAAATGGGTAGCTCGTGTATTTCAATTGAGTCGACTTGCGCCGGCAACAATCATAATCCAAGCCCACGCTTATCTCATTACAAAATAAGGGGGTTGAGAGTTTCATGACACTCAAACAGACATACTCTTCGGAATACCAAAGAGTGCAAGGTGCGTTCAAAGATTCGATGATTCACTGAATTCTGCAATTCACATTACTTATCGCAATTCGCTGCGTTCTTCATCGATGTGAGAGCCAAGAGATCCGTTGCTGAAAGTTTTGTTTTTATTTATGCTCAATTAAGAGACTGTTACATTCTTATACTAATGTGTTAAAATGTGTGTAAAAAGAAGTGTGTGCACAGTGTAAGGAA…	ACGTCCTCAGCGAAATAATTATCACGCCGAGTCAAACCGTTTATTTCAAATGGGTAGCTCGTGTATTTCAATTGAGTCGACTTGCGCCGGCAACAATCATAATCCAAGCCCACGCTTATCTCATTACAAAATAAGGGGGTTGAGAGTTTCATGACACTCAAACAGACATACTCTTCGGAATACCAAAGAGTGCAAGGTGCGTTCAAAGATTCGATGATTCACTGAATTCTGCAATTCACATTACTTATCGCAATTCGCTGCGTTCTTCATCGATGTGAGAGCCAAGAGATCCGTTGCTGAAAGTTTTGTTTTTATTTATGCTCAATTAAGAGACTGTTACATTCTTATACTAATGTGTTAAAATGTGTGTAAAAAGAAGTGTGTGCACAGTGTAAGGAA…	Basidiomycota	Cystobasidiales	Cystobasidiaceae	Cystobasidium

## Sheet: Tabelle1
Table S2: Draft Genome statistics for 3 yeast isolates obtained from snail excrement, Table S3: Draft Genome statistics collinearity to reference genome.
Table S2. Draft Genome statistics for 3 yeast isolates obtained from snail excrement
Isolate	Species	no. of read pairs	genome size contigs	no. of contigs	contig N50	contig L50	Longest contig	GC content
			[Mb]			[kb]
B079	Hanseniaspora uvarum	2,128,021	8661	3.965	1.045	2345	56.676 kb	31.76
B143	Pichia kudriavzevii	1,894,475	10372	1.553	263	11885	96.924 kb	38.22
B144	Meyerozyma guilliermondii	2,611,128	10622	30	4	834646	2.088 Mb	43.73
Table S3. Draft Genome statistics collinearity to reference genome
		Collinearity		Divergence
Isolate	species	Number of LCB/ no. of LCB > 50 kb	LCB genomic coverage all/ > 50 kb	average divergence per 1 kb window	number of 1 kb windows
			[Mb]
B079	Hanseniaspora uvarum	336/ 59	7.681/ 6.376	0.0100 ± 0.0082	4.197
B143	Pichia kudriavzevii	35/ 17	10.320/ 10.093	0.0030 ± 0.0029	9.606
B144	Meyerozyma guilliermondii	2020-12-25	10.594/ 10.499	0.0028 ± 0.0065	10.424

## Sheet: legend
	pident, sseqid and stitle were left blank intentionally for some samples (e.g. multiple 100% matches to multiple species or absence of a 'conclusive' match)
dex	dex - index enumerating rows
qseqid	qseqid - query sequence id; isolate ID this study
GenBankAccession	GenBankAccession - subject sequence id
sseqid	sseqid - subject sequence id (sequence retrieved by BLAST)
query_dna	query_dna - query dna sequence
species	species - species
note	note - note
stitle	stitle - subject sequence title
pident	pident - pairwise identitiy
match_length	match_length - match length to subject sequence
evalue	evalue - e-value
nident	nident - number of identical sites
mismatch	mismatch - number of mismatches
gapopen	gapopen - number of gaps
gaps	gaps - number of gap sites
qseq	qseq - query sequence from BLAST alignment; may contain gaps
sseq	sseq - subject sequence from BLAST alignment; may contain gaps
phyl	phyl - phylum
ord	ord - order
fam	fam - family
genus	gen - genus
